# Supplementary material for: Attitudes of pharmacy students towards patient safety: a cross-sectional study from six developing countries
Source: PubMed Central journal article supplement — BMJ Open. 2020 Dec 15;10(12):e039459. doi: 10.1136/bmjopen-2020-039459 (PMC7745325; doi:10.1136/bmjopen-2020-039459), 2020-12-15
Supplement: bmjopen-2020-039459.draft_revisions.pdf [file bmjopen-2020-039459.draft_revisions.pdf]

# BMJ Open

BMJ Open is committed to open peer review. As part of this commitment we make the peer review history of every article we publish publicly available.

When an article is published we post the peer reviewers' comments and the authors' responses online. We also post the versions of the paper that were used during peer review. These are the versions that the peer review comments apply to.

The versions of the paper that follow are the versions that were submitted during the peer review process. They are not the versions of record or the final published versions. They should not be cited or distributed as the published version of this manuscript.

BMJ Open is an open access journal and the full, final, typeset and author-corrected version of record of the manuscript is available on our site with no access controls, subscription charges or pay-per-view fees (<http://bmjopen.bmj.com>).

If you have any questions on BMJ Open's open peer review process please email [info.bmjopen@bmj.com](mailto:info.bmjopen@bmj.com)

# BMJ Open

## Attitudes of pharmacy students towards patient safety: a cross-sectional study from six developing countries

|                               |                                                                                                                                                                                                                                                                                                                                                                                                                                                                                                                                                                                                                                                                                                                                                                                                                                                                                                                                                                                                                                                                                                                                                                                                                                                                                                                                                                                                                                                                                                                                                                                           |
|-------------------------------|-------------------------------------------------------------------------------------------------------------------------------------------------------------------------------------------------------------------------------------------------------------------------------------------------------------------------------------------------------------------------------------------------------------------------------------------------------------------------------------------------------------------------------------------------------------------------------------------------------------------------------------------------------------------------------------------------------------------------------------------------------------------------------------------------------------------------------------------------------------------------------------------------------------------------------------------------------------------------------------------------------------------------------------------------------------------------------------------------------------------------------------------------------------------------------------------------------------------------------------------------------------------------------------------------------------------------------------------------------------------------------------------------------------------------------------------------------------------------------------------------------------------------------------------------------------------------------------------|
| Journal:                      | <i>BMJ Open</i>                                                                                                                                                                                                                                                                                                                                                                                                                                                                                                                                                                                                                                                                                                                                                                                                                                                                                                                                                                                                                                                                                                                                                                                                                                                                                                                                                                                                                                                                                                                                                                           |
| Manuscript ID                 | bmjopen-2020-039459                                                                                                                                                                                                                                                                                                                                                                                                                                                                                                                                                                                                                                                                                                                                                                                                                                                                                                                                                                                                                                                                                                                                                                                                                                                                                                                                                                                                                                                                                                                                                                       |
| Article Type:                 | Original research                                                                                                                                                                                                                                                                                                                                                                                                                                                                                                                                                                                                                                                                                                                                                                                                                                                                                                                                                                                                                                                                                                                                                                                                                                                                                                                                                                                                                                                                                                                                                                         |
| Date Submitted by the Author: | 15-Apr-2020                                                                                                                                                                                                                                                                                                                                                                                                                                                                                                                                                                                                                                                                                                                                                                                                                                                                                                                                                                                                                                                                                                                                                                                                                                                                                                                                                                                                                                                                                                                                                                               |
| Complete List of Authors:     | <p>Naser, Abdallah; Isra University, Department of Applied Pharmaceutical Sciences and Clinical Pharmacy<br/>         Alsairafi, Zahra; Kuwait University, Department of Pharmacy Practice, Faculty of Pharmacy<br/>         Awaisu, Ahmed; Qatar University, Department of Clinical Pharmacy and Practice, College of Pharmacy, QU Health<br/>         Alwafi, Hassan; Umm Al-Qura University, Department of Pharmacology and Toxicology<br/>         Awwad, Oriana ; The University of Jordan, Department of Biopharmaceutics and Clinical Pharmacy<br/>         Dahmash, Eman; Isra University, Department of Applied Pharmaceutical Sciences and Clinical Pharmacy<br/>         Hussain, Salman; Jamia Hamdard, Department of Pharmaceutical Medicine, School of Pharmaceutical Education and Research<br/>         Singh, Avinash ; Jamia Hamdard, Department of Pharmaceutical Medicine, School of Pharmaceutical Education and Research<br/>         Alsharif , Alaa ; UCL School of Pharmacy, Research Department of Practice and Policy, UCL School of Pharmacy; Princess Nora bint Abdul Rahman University, Department of Pharmacy Practice, Faculty of Pharmacy<br/>         Jeragh-Alhaddad, Fatima ; Kuwait University, Department of Pharmacy Practice, Faculty of Pharmacy<br/>         Kautsar, Angga ; Universitas Padjadjaran, Faculty of Pharmacy<br/>         AbuAlhommos, Amal ; King Faisal University, Pharmacy Practice Department, Clinical Pharmacy College<br/>         Alyami, Hamad; Najran University, Department of Pharmaceutics, College of Pharmacy</p> |
| Keywords:                     | MEDICAL EDUCATION & TRAINING, Health & safety < HEALTH SERVICES ADMINISTRATION & MANAGEMENT, Quality in health care < HEALTH SERVICES ADMINISTRATION & MANAGEMENT                                                                                                                                                                                                                                                                                                                                                                                                                                                                                                                                                                                                                                                                                                                                                                                                                                                                                                                                                                                                                                                                                                                                                                                                                                                                                                                                                                                                                         |
|                               |                                                                                                                                                                                                                                                                                                                                                                                                                                                                                                                                                                                                                                                                                                                                                                                                                                                                                                                                                                                                                                                                                                                                                                                                                                                                                                                                                                                                                                                                                                                                                                                           |

SCHOLARONE™  
Manuscripts

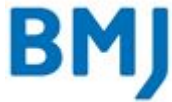

I, the Submitting Author has the right to grant and does grant on behalf of all authors of the Work (as defined in the below author licence), an exclusive licence and/or a non-exclusive licence for contributions from authors who are: i) UK Crown employees; ii) where BMJ has agreed a CC-BY licence shall apply, and/or iii) in accordance with the terms applicable for US Federal Government officers or employees acting as part of their official duties; on a worldwide, perpetual, irrevocable, royalty-free basis to BMJ Publishing Group Ltd ("BMJ") its licensees and where the relevant Journal is co-owned by BMJ to the co-owners of the Journal, to publish the Work in this journal and any other BMJ products and to exploit all rights, as set out in our [licence](#).

The Submitting Author accepts and understands that any supply made under these terms is made by BMJ to the Submitting Author unless you are acting as an employee on behalf of your employer or a postgraduate student of an affiliated institution which is paying any applicable article publishing charge ("APC") for Open Access articles. Where the Submitting Author wishes to make the Work available on an Open Access basis (and intends to pay the relevant APC), the terms of reuse of such Open Access shall be governed by a Creative Commons licence – details of these licences and which [Creative Commons](#) licence will apply to this Work are set out in our licence referred to above.

Other than as permitted in any relevant BMJ Author's Self Archiving Policies, I confirm this Work has not been accepted for publication elsewhere, is not being considered for publication elsewhere and does not duplicate material already published. I confirm all authors consent to publication of this Work and authorise the granting of this licence.

1  
2  
3 **Article title:** Attitudes of pharmacy students towards patient safety: a cross-sectional study from six developing  
4 countries  
5  
6

7 **Short-running title:** Attitudes of pharmacy students towards patient safety  
8  
9

10 **Authors' information:**  
11

12 Abdallah Y Naser<sup>1</sup>, Zahra Khalil Alsairafi<sup>2</sup>, Ahmed Awaisu<sup>3</sup>, Hassan Alwafi<sup>4</sup>, Oriana Awwad<sup>5</sup>, Eman Zmaily  
13 Dahmash<sup>1</sup>, Salman Hussain<sup>6</sup>, Avinash Kumar Singh<sup>6</sup>, Alaa Alsharif<sup>7,8</sup>, Fatima B Jeragh-Alhaddad<sup>2</sup>, Angga  
14 Prawira Kautsar<sup>9</sup>, Amal Khaleel AbuAlhommos<sup>10</sup>, Hamad S. Alyami<sup>11</sup>  
15  
16  
17  
18

19 **Corresponding Author:** Dr. Abdallah Y Naser, Assistant Professor in Clinical Pharmacy and  
20 Pharmacoeconomics, Department of Applied Pharmaceutical Sciences and Clinical Pharmacy, Faculty of  
21 Pharmacy, Isra University, Amman, Jordan (abdallah.naser@iu.edu.jo), 00962795285555  
22  
23  
24  
25  
26  
27  
28  
29  
30  
31  
32  
33  
34  
35  
36  
37  
38  
39  
40  
41  
42  
43  
44  
45  
46  
47  
48  
49  
50  
51  
52  
53  
54  
55  
56  
57  
58  
59  
60

**ABSTRACT**

**Objective:** To evaluate the attitudes of undergraduate pharmacy students towards patient safety in six developing countries.

**Design:** A cross-sectional study.

**Setting:** Participants were enrolled from the participating universities in six countries.

**Participants:** Undergraduate pharmacy students from the participating universities in six developing countries (Jordan, Saudi Arabia, Kuwait, Qatar, India and Indonesia) were invited to participate in the study between October 2018 and September 2019.

**Primary outcome:** Attitudes towards patient safety was measured using 14-item questionnaire that contained five subscales: being quality-improvement focused, internalising errors regardless of harm, value of contextual learning, acceptability of questioning more senior healthcare professionals' behaviour, and attitude towards open disclosure. Multiple-linear regression analysis was used to identify predictors of positive attitudes towards patient safety.

**Results:** A total of 2,595 students participated in this study (1,044 from Jordan, 514 from Saudi Arabia, 134 from Kuwait, 61 from Qatar, 416 from India and 429 from Indonesia). Overall, the pharmacy students reported a positive attitude towards patient safety with a mean score of 37.4 (SD= 7.0) out of 56 (66.8%). The "being quality-improvement focused" subscale had the highest score, 75.6%. The subscale with the lowest score was "internalising errors regardless of harm", 49.2%. Female students had significantly better attitudes towards patient safety scores compared to male students ( $p=0.001$ ). Being at a higher level of study and involvement in or witnessing harm to patients while practising were important predictors of negative attitudes towards patient safety ( $p<0.001$ ).

**Conclusion:** Patient safety content should be covered comprehensively in pharmacy curricula and reinforced in each year of study. This should be more focused on students in their final year of study and who have started their training. This will ensure that the next generation of pharmacists are equipped with the requisite knowledge, core competencies and attitudes to ensure optimal patient safety when they practice.

**Keywords:** Attitude; Patient; Pharmacy; Safety; Students.

### Strengths and limitations of this study

- This study provides evidence for a better understanding of the attitudes of undergraduate pharmacy students towards patient safety in developing countries.
- This is the first large-scale study to investigate this association in the Middle East and to extend the generalisability of the current evidence from other countries.
- We were not able to estimate the response rate for our study, which might lead to nonresponse bias.

For peer review only

## INTRODUCTION

Patient safety is one of the main concerns of healthcare systems during the provision of healthcare services and is increasingly being used as a measure of healthcare quality. The World Health Organization (WHO) has stressed the importance of reducing healthcare errors and establishing action plans to reduce patient harm and increase patient safety<sup>1</sup>. Medical errors are associated with high probability of patients harm and high mortality rate which raised the need for strategies that are evidence-based to enhance patient safety<sup>2</sup>. Research results revealed that around 10.0% of patients admitted to hospital within developed countries have a chance of being harmed, and up to 18.0% of hospital admissions experienced adverse events. Besides, there is a growing concern pertinent to the level of harm among patients in developing countries that could be attributed to the lack of accountability<sup>3-5</sup>.

One of the best strategies to promote safer attitudes towards patient safety is education<sup>6,7</sup>. Patient safety education for undergraduate healthcare students has been considered a crucial element in minimising patient harm and developing a positive patient safety culture<sup>8</sup>. Several key international organisations have made recommendations to reshape healthcare professional education curricula to guarantee that they foster students' attitudes toward patient safety through enhancing their knowledge, skills and attitudes<sup>9-14</sup>. In recent years, pharmacy degree programmes have included content related to patient safety through curriculum guides<sup>5</sup>, including the WHO's Patient Safety Curriculum Guide for Medical Schools<sup>15</sup> and their Multiprofessional Patient Safety Curriculum Guide<sup>16-19</sup>. Pharmacy students, in developing countries, gain some practical experience in healthcare settings at an earlier stage of their studies, either through experiential education placements or simulation-based programs<sup>20</sup>. However, unlike other healthcare professions, pharmacists' training is not well structured and does not mandate close monitoring of students during their training by preceptors. Although patient-centred care and patient safety might have been embedded through the curriculum, it has been mostly informal and theoretical<sup>4,5,21</sup>.

In developing countries, there are cultural concerns, where pharmacy students are intimidated by other healthcare professionals particularly, physicians, when they are in the clinical practice setting which will hamper patient safety. The 'hierarchical difference in medical knowledge' will make young pharmacists' reluctance to question decisions made by physicians<sup>5,22</sup>. Therefore, improving patient safety in developing countries requires changing attitude particularly in shifting the blame culture in healthcare settings.

Improving patient safety requires preparing future healthcare professionals to re-enforce patient safety. Therefore, efforts to foster patient safety in developing countries must be augmented and 'education system during undergraduate studies, to provide knowledge, that is reflected into attitudes, which will be translated into practice' to make healthcare safer<sup>22</sup>.

1  
2  
3 Despite the increasing effort to enhance patient safety through improving healthcare professional curricula, this  
4 improvement is considered challenging, and progress is very slow<sup>5,12,13,23-28</sup>. Developing positive attitudes among  
5 university students is important as it is positively related to their achievement<sup>29</sup>. The accomplishment of  
6 educational goals related to delivering safe and quality healthcare services requires students to have positive  
7 attitudes towards patient safety<sup>29,30</sup>. Since attitude can substantially impact an individual's behaviour and practice  
8  
9  
10  
11  
12  
13<sup>31</sup>, it is crucial that pharmacy students' attitudes towards patient safety are understood and evaluated particularly  
14 in developing countries.

15  
16 Previous studies have explored the attitudes and values of healthcare students towards patient safety in different  
17 countries, using different instruments<sup>18,19,32-39</sup>. The most widely-used validated tool is the patient safety/medical  
18 fallibility survey, which was originally developed by Madigosky et al. for use among medical students<sup>32</sup>. This  
19 tool was validated to assess the patient safety attitudes of pharmacy students by Walpola et al.<sup>40</sup>. However, there  
20 are a limited number of studies that have focused on attitudes of undergraduate pharmacy students towards patient  
21 safety, especially in developing countries. Therefore, the aim of this study was to evaluate the attitudes of  
22 undergraduate pharmacy students towards patient safety in six developing countries.

## 23 24 25 26 27 28 29 30 **METHODS**

### 31 32 **Study design**

33  
34 A quantitative cross-sectional survey using a self-administered questionnaire was conducted to explore patient  
35 safety attitudes and values among pharmacy students in six developing countries (Jordan, Saudi Arabia, Kuwait,  
36 Qatar, India and Indonesia). To achieve the study aim, a self-administered questionnaire approach was adopted.  
37  
38 This approach has the advantage of being easily administered to a large number of participants within a short time  
39 period, eliminating interviewer bias<sup>41</sup>. In addition, this technique can easily explain students' behaviour<sup>42</sup>.

### 40 41 42 43 **Sample size**

44  
45 Based on the original study conducted by Walpola et al.<sup>40</sup>, a sample size of 200 students from each country was  
46 considered adequately representative. The original study estimated the appropriate sample size based on  
47 Boomsma's method of estimating a minimum sample size to conduct a confirmatory factor analysis based on the  
48 number of items to number of factors ratio of the model<sup>43</sup>.

### 49 50 51 52 53 **Sampling strategy**

54  
55 The study population included undergraduate pharmacy students across all professional years of study. A  
56 convenience sampling technique was used to recruit eligible participants as it was not feasible to determine a  
57 sampling frame in each of the six countries. This sampling technique is a type of non-probability sampling method,  
58  
59  
60



1  
2  
3 in which participants from the target population who met the inclusion criteria of the study were easily accessible  
4 due to geographical proximity, availability at a given time, or were willing to take part in the study <sup>44</sup>. Student  
5 recruitment was conducted by researchers (AN, OA) in Jordan, (A. Alsharif) in Saudi Arabia, (ZA) in Kuwait,  
6 (A. Awaisu) in Qatar, (SH) in India and (AK) in Indonesia. The questionnaire was administered either as a hard-  
7 copy or electronically to eligible participants in a consistent manner to reduce the risk of assessment bias. All the  
8 undergraduate pharmacy students in the participating universities were approached and invited to take part in the  
9 study. For students who agreed to participate, the questionnaire was administered either as a hard copy or  
10 electronically after the study aim and objectives had been explained.

### 11 **Survey instrument**

12 A previously validated questionnaire <sup>40</sup> was used in this study to explore the attitudes of undergraduate pharmacy  
13 students towards patient safety. This questionnaire was originally developed and validated by Walpola and  
14 colleagues, who validated an adaptation of Madigosky et al's questionnaire (the Patient Safety/Medical Fallibility  
15 Curriculum Survey) <sup>32</sup>, to evaluate attitudes and values of pharmacy students towards patient safety. Walpola et  
16 al.'s 14-item questionnaire comprised five subscales: (1) quality-improvement focused (four questions), (2)  
17 internalising errors regardless of harm (three questions), (3) value of contextual learning (three questions), (4)  
18 acceptability of questioning more senior healthcare professionals' behaviour (two questions), and (5) attitude  
19 towards open disclosure (two questions). The study questionnaire asked undergraduate pharmacy students about  
20 the degree of applicability of each item to them using a 5-point Likert scale. Response options ranged from 0 to  
21 4, where 0 meant "strongly disagree" and 4 meant "strongly agree". Three items (items numbered 5, 6, and 7)  
22 were negatively worded and, thus, were reversely scored during the analysis, where 0 meant "strongly agree" and  
23 4 meant "strongly disagree". The total possible score for the questionnaire ranged between 0 and 56 and could be  
24 interpreted based on the mid-point of the highest possible score of the scale (equal to 28): the higher the score,  
25 the better the attitude towards patient safety. Besides, the following data were collected: participant's gender, year  
26 of study, prior practical experience in healthcare settings- if applicable, and involvement in an incident that  
27 resulted in harm or potential harm as a result of receiving healthcare.

28 The use of a pre-existing questionnaire has the advantage of using a validated and tested instrument, which  
29 increases the reliability of measurement <sup>45</sup>. In addition, the use of an existing questionnaire allows for comparison  
30 with different populations <sup>46</sup>. The mean score  $\pm$  SD for each item was calculated based on the student responses  
31 using the 5-point Likert scale, which ranged between 0 and 4. In addition, the total mean score for each subscale  
32 was calculated to allow comparison between different subscales.

### **Validity and reliability of the survey instrument**

Walpola's questionnaire was examined for its psychometric properties in 446 students<sup>40</sup>. The face and content validity of the questionnaire were tested. In addition, exploratory factor analysis was conducted to test the construct validity and the internal consistency of the questionnaire was examined. In addition, the original investigators conducted focus groups among three populations: initially among five pharmacy academics, five practising pharmacists and seven pharmacy student representatives to assess the face validity of the survey instrument. Besides this, we examined Cronbach's alpha measures for the five factors in the questionnaire, which ranged between 0.56 and 0.78. The overall Cronbach's alpha measure was 0.72. This identified the questionnaire as having acceptable stability.

### **Data collection procedure**

In Jordan, we used hard copies of the questionnaire, and the recruitment of participants was conducted in two universities (one private and one government). An electronic version of the questionnaire was used for the students recruited in the other countries. In Saudi Arabia, the survey was distributed in three government universities. In Indonesia, student recruitment was conducted in two government universities, while in India it was conducted in five universities. In Kuwait and Qatar, the study was conducted in one government university in each country, these being the only available ones that offer an undergraduate pharmacy degree program.

### **Patient and public involvement**

Patients were not involved in any aspect of the design or conduct of this study.

### **Statistical analysis**

Data were analysed using SPSS software, version 25 (IBM Corp, Armonk, NY, USA). Continuous variables were reported as mean ( $\pm$  standard deviation [SD]), while categorical variables were reported as frequencies and percentages. The Kolmogorov–Smirnov and Shapiro Wilk tests were used to check the normality of the data. Students' scores were interpreted as a continuous scale based on the scale midpoint, where scores above the midpoint represented more positive attitudes towards patient safety for that factor. The one-way ANOVA test and Pearson's correlation coefficient were used to compare the mean scores between different demographic groups and to analyse the correlation between continuous independent variables and students' scores, respectively. Tukey's HSD post-hoc test was conducted to identify the source of significant variation within each group. Additionally, significant predictors of positive attitudes towards patients' safety were determined using multiple linear regression analysis. A confidence interval of 95% ( $p < 0.05$ ) was applied to represent the statistical significance of the results, and the level of significance was predetermined as 5%.

## RESULTS

### Students' demographic characteristics

A total of 2,595 undergraduate pharmacy students participated in the study (Jordan = 1,044, Saudi Arabia = 514, Indonesia = 429, India = 416, Kuwait = 134 and Qatar = 61). About 67.0% (n = 1,752) of the students were female. The majority of the respondents were recruited from Jordan (n= 1,044; 39.9%), followed by Saudi Arabia (n= 514; 19.7%). An approximately similar percentage of participants were recruited from Indonesia (n= 429; 16.5%) and India (n= 416; 16.0%). The lowest percentages of participants came from Kuwait and Qatar, with only 5.2% (n= 134) and 2.4% (n= 61) being recruited from these two countries, respectively. This was expected due to the small population size and, thus, the small number of pharmacy students (Kuwait and Qatar only have one faculty of pharmacy each). The majority of the students were in their thirds and fourth year of study with 21.0% (n= 546) and 26.2% (n= 679), respectively. Only 38.2% (n= 990) of the participants reported that they had had prior or were undergoing current practical experience in a practice setting, with only 27.4% (n= 712) of the participants have been involved in or have witnessed harm to patients while practicing. **Table 1** below summarises the demographic characteristics of the study participants from each country.

**Table 1** Pharmacy students' characteristics from each country.

| <b>Demographics</b>                                                                 | <b>Overall (n= 2,595)</b> | <b>Jordan (n= 1,044)</b> | <b>Saudi Arabia (n= 514)</b> | <b>Indonesia (n= 429)</b> | <b>India (n= 416)</b> | <b>Kuwait (n= 134)</b> | <b>Qatar (n= 61)</b> |
|-------------------------------------------------------------------------------------|---------------------------|--------------------------|------------------------------|---------------------------|-----------------------|------------------------|----------------------|
| <b>Gender No. (%)</b>                                                               |                           |                          |                              |                           |                       |                        |                      |
| Female                                                                              | 1,752 (67.5)              | 741 (71.0)               | 323 (62.8)                   | 388 (90.4)                | 124 (29.8)            | 115 (85.8)             | 61 (100)             |
| <b>Year of study No. (%)</b>                                                        |                           |                          |                              |                           |                       |                        |                      |
| First year                                                                          | 511 (19.7)                | 74 (7.1)                 | 9 (1.8)                      | 255 (59.4)                | 165 (39.7)            | 0 (0.0)                | 8 (13.1)             |
| Second year                                                                         | 407 (15.7)                | 148 (14.2)               | 21 (4.1)                     | 78 (18.2)                 | 108 (26.0)            | 32 (23.9)              | 20 (32.8)            |
| Third year                                                                          | 546 (21.0)                | 243 (23.3)               | 110 (21.4)                   | 60 (14.0)                 | 57 (13.7)             | 67 (50.0)              | 9 (14.8)             |
| Fourth year                                                                         | 679 (26.2)                | 319 (30.6)               | 232 (45.1)                   | 29 (6.8)                  | 64 (15.4)             | 22 (16.4)              | 13 (21.3)            |
| Fifth year                                                                          | 452 (17.4)                | 260 (24.9)               | 142 (27.6)                   | 7 (1.6)                   | 22 (5.3)              | 13 (9.7)               | 11 (18.0)            |
| <b>Prior healthcare experience No. (%)</b>                                          |                           |                          |                              |                           |                       |                        |                      |
| Yes                                                                                 | 990 (38.2)                | 448 (42.9)               | 281 (54.7)                   | 39 (9.1)                  | 141 (33.9)            | 49 (36.6)              | 32 (52.5)            |
| <b>Ever been involved in or witnessed harm to patients while practicing No. (%)</b> |                           |                          |                              |                           |                       |                        |                      |
| Yes                                                                                 | 712 (27.4)                | 249 (23.9)               | 230 (44.7)                   | 82 (19.1)                 | 110 (26.4)            | 28 (20.9)              | 13 (21.3)            |

### Pharmacy students' attitude towards patient safety

The mean score of the participants for the total scale was 37.4 [SD= 7.0] out of 56 (the highest possible score), 66.8%. The first subscale measured students' attitude in terms of "being quality-improvement focused". The participants' score was the highest for this scale, 75.6%. The lowest score was for the "internalising errors regardless of harm" subscale, 49.2%. **Table 2** summarizes these findings.

**Table 2** Pharmacy students mean attitude towards patient safety scores in individual subscales and total scale scores (n = 2,595).

| Subscale                                                                     | Number of items | Range | Mean Score (SD) | Students score out of 100% |
|------------------------------------------------------------------------------|-----------------|-------|-----------------|----------------------------|
| Being quality improvement focused                                            | 4               | 0-16  | 12.1 (3.1)      | 75.6                       |
| Acceptability of questioning more senior healthcare professionals' behaviour | 2               | 0-8   | 5.6 (1.7)       | 70.0                       |
| Attitude towards open disclosure                                             | 2               | 0-8   | 5.5 (1.7)       | 68.8                       |
| Value of contextual learning                                                 | 3               | 0-12  | 8.2 (2.2)       | 68.3                       |
| Internalising errors regardless of harm                                      | 3               | 0-12  | 5.9 (3.2)       | 49.2                       |
| <b>Total Scale</b>                                                           | 14              | 0-56  | 37.4 (7.0)      | 66.8                       |

Abbreviation: SD, Standard deviation

### Effect of students' characteristics on their attitude towards patients' safety

**Table 3** presents the effect of the students' demographics on their attitude towards patient safety scores. Students' scores significantly differed by country, gender, year of study, having prior experience in healthcare and being involved in or having witnessed harm to patients while practicing ( $p < 0.01$ ). Tukey's HSD post-hoc test confirmed that all countries contributed to the significant difference in the mean score except Indonesia, and that Saudi Arabia, Kuwait and India had the most significant contributions in this variation. Regarding the year of study variable, the Tukey HSD test confirmed that all years of study contributed to the significant variation between groups.

**Table 3** Pharmacy students' attitude towards patient safety score by students' characteristics (n= 2,595).

| Variable                                                                    | Patients' safety scores |     |          |
|-----------------------------------------------------------------------------|-------------------------|-----|----------|
|                                                                             | Mean                    | SD  | P-value  |
| <b>Country</b>                                                              |                         |     |          |
| Jordan                                                                      | 38.9                    | 6.7 | 0.000*** |
| Saudi Arabia                                                                | 32.1                    | 7.0 |          |
| Indonesia                                                                   | 38.6                    | 5.3 |          |
| India                                                                       | 40.6                    | 5.5 |          |
| Kuwait                                                                      | 32.1                    | 6.6 |          |
| Qatar                                                                       | 36.2                    | 3.9 |          |
| <b>Gender</b>                                                               |                         |     |          |
| Male                                                                        | 36.6                    | 7.8 | 0.000*** |
| Female                                                                      | 37.7                    | 6.6 |          |
| <b>Year of study</b>                                                        |                         |     |          |
| First year                                                                  | 39.3                    | 6.1 | 0.000*** |
| Second year                                                                 | 37.8                    | 6.8 |          |
| Third year                                                                  | 37.0                    | 6.9 |          |
| Fourth year                                                                 | 36.4                    | 7.7 |          |
| Fifth year                                                                  | 36.8                    | 7.1 |          |
| <b>Prior healthcare experience</b>                                          |                         |     |          |
| Yes                                                                         | 36.8                    | 7.4 | 0.001**  |
| No                                                                          | 37.7                    | 6.8 |          |
| <b>Ever been involved in or witnessed harm to patients while practicing</b> |                         |     |          |
| Yes                                                                         | 36.2                    | 7.8 | 0.001**  |
| No                                                                          | 37.8                    | 6.7 |          |

\*\*p &lt; 0.01

\*\*\*p &lt; 0.001

Abbreviation: SD, Standard deviation

Simple linear regression analysis showed that all demographic variables were significantly associated with a better attitude towards patients' safety score ( $p < 0.01$ ). Multiple linear regression analysis showed that female students had a better attitude towards patients' safety score ( $p = 0.001$ ). In addition, it showed that higher-level students and being involved in or having witnessed harm to patients while practicing were associated with a slightly lower score ( $p = 0.000$ ), **Table 4**.

**Table 4** Multiple regression analysis predicting students' attitude towards patients' safety.

| Variable                                                         | Model <sup>a</sup> |       |          |
|------------------------------------------------------------------|--------------------|-------|----------|
|                                                                  | B                  | SE    | β        |
| Demographic data                                                 |                    |       |          |
| Females                                                          | 0.96               | 0.292 | 0.06**   |
| Year of study                                                    |                    |       |          |
| <b>Second year</b>                                               | -1.45              | 0.46  | -0.08**  |
| <b>Third year</b>                                                | -2.20              | 0.43  | -0.13*** |
| <b>Fourth year</b>                                               | -2.76              | 0.42  | -0.17*** |
| <b>Fifth year</b>                                                | -2.41              | 0.42  | -0.13*** |
| Having prior experience in healthcare                            |                    |       |          |
| <b>Yes</b>                                                       | 0.21               | 0.33  | 0.01     |
| Being involved in or witnessed harm to patients while practicing |                    |       |          |
| <b>Yes</b>                                                       | -1.17              | 0.33  | -0.07*** |
| Constant                                                         |                    |       |          |
| Adjusted R <sup>2</sup>                                          |                    |       | 0.030    |
| P-value                                                          |                    |       | 0.000    |

\*p < 0.05, \*\*p < 0.01, \*\*\*p < 0.001

a: includes gender, year of study, having prior experience in healthcare, and being involved in or witnessed harm to patients while practicing.

B: the average change in the dependent variable associated with a 1 unit change in the independent variable, statistically controlling for the other independent variables; SE: it is the standard deviation of its sampling distribution or an estimate of that standard deviation;

β: a statistical measure that compares the strength of the effect of each individual independent variable to the dependent variable

## DISCUSSION

The current study has identified the attitudes of undergraduate pharmacy students towards patients' safety. The sample was collected from different universities in different countries, across all years of study for the pharmacy program, and using a previously validated tool. The data was collected from a large sample compared to previous similar studies. For example, Carruthers et al. (2009) conducted a questionnaire-based study on 364 undergraduate medical students and 66 tutors from one medical school in the UK<sup>6</sup>, while Tegegn et al. (2017) conducted their study with a population of 83 students from a single university in Ethiopia<sup>47</sup>. Also, there were previous surveys conducted by Tegegn et al.<sup>47</sup> and Carruthers et al.<sup>6</sup> which did not obtain data on the nationality of the participants. This limited our ability to make direct comparisons between different nationalities settings. The results highlighted that, generally, a positive attitude towards patient safety was an important issue among pharmacy undergraduate students. There was a small but significant difference in attitudes between male and female pharmacy students. These results are comparable with those of another previous study<sup>47</sup>, where 86.7% of female respondents had an overall positive attitude to patient safety compared to 83% of their male counterparts. Neither the previous nor the current study was able to explain this difference, and a further study of attitudes of male and female students towards patient safety is required to elucidate whether this is a real gender-influenced trait.

In the current study, there were two factors which have been negatively correlated with attitudes towards patient safety; these are the 'year of study' and "being involved in or having witnessed harm to patients while practicing".

1  
2  
3 Similar findings were reported in a previous study and showed that students in their early years of study had  
4 higher scores (a better attitude towards patient safety) compared to others in their final years of training<sup>48</sup>. This  
5 could be justified because some health care students believe that patient safety issues cannot be taught and can  
6 only be learned through clinical experience when qualified<sup>48</sup>. This incorrect belief could have arisen among the  
7 students due to a lack of formal teaching that have led to the reluctance to adopt patient safety practices. These  
8 results are inconsistent with another study's results among pharmacy students in Ethiopia<sup>47</sup>. Such a difference  
9 between the studies could be due to variations in the study settings, the recruited participants or, possibly, due to  
10 the greater emphasis allocated to teaching patient safety to students in specific countries over others. A follow-up  
11 study focusing on the change in attitudes towards the pharmacy teaching course is required. In addition, there is  
12 a need for the reinforcement towards patient safety throughout the pharmacy program. This has also been  
13 recommended previously in studies about attitudes towards patient safety among medical students<sup>6,49</sup>. In a  
14 previous study, medical students who had received education on patient safety attached greater importance to this  
15 topic and had more confidence in reporting incidences of poor patient safety<sup>6</sup>. Also, it has been highlighted  
16 previously that there is a lack of patient safety education among a range of clinical disciplines, including medical,  
17 nursing and pharmacy students<sup>50,51</sup>. Patient safety education has the potential to revolutionise the attitudes of  
18 pharmacists and pharmacists-in-training, which has broad implications for practice<sup>50</sup>.

19  
20  
21 In addition to the importance of educating patient safety at the university level, there is a need for constant  
22 reinforcement of messages regarding patient safety. In one study, it has been reported that some of the positive  
23 messages regarding improving patient care, which were taught to second-year medical students, had been  
24 forgotten after one year<sup>32</sup>. Those students were also less likely to be open about the errors they had witnessed and  
25 less likely to believe that it was necessary to disclose errors that had not caused patient harm. Similarly, in the  
26 present study, it has been found that 49% of students agreed that errors should be internalised, regardless of harm  
27 to patients. Pharmacy students in Ethiopia shared the same belief in reporting self-errors, where only half of the  
28 students agreed, or strongly agreed, that pharmacists should report errors concerning a patient in situations where  
29 harm had occurred<sup>47</sup>. A previous study in Pakistan that assessed the attitudes and perceptions of postgraduate  
30 students towards patient safety reported consistent findings: that students felt less confident in reporting any error  
31 other people had made in the work environment, no matter how serious the outcome had been for the patient<sup>48</sup>.  
32 Many studies from different countries have reported that health care students have a common belief that medical  
33 errors are inevitable, and that even very experienced people make medical errors<sup>48,49,52,53</sup>. Reporting medical  
34 errors is important, and a failure to report such types of error indicates a lack of awareness of the risky



1  
2  
3 consequences of such practice to the healthcare services provided to the patients. This finding has an implication  
4 for further research to understand the reasons for this behaviour; whether it is from a fear of reprisal from  
5 colleagues or patients or a lack of recognition of reporting as part of the duty of care to patients. However,  
6  
7 incompatible results have been reported in North America, where the majority of students had positive attitudes  
8  
9 towards reporting serious errors when they encountered them, but they had inadequate knowledge about the  
10  
11 process of reporting them<sup>54</sup>. Also, in that study, it can be seen that some students had conflicting attitudes towards  
12  
13 reporting errors. They believed that reporting them would compromise inter-professional relationships, reduce the  
14  
15 patients' confidence in the healthcare system and interrupt the workflow.  
16  
17

### 18 **Strengths and weaknesses**

19  
20 The current study has many strengths. First, to the best of our knowledge, this study is the first large-scale study  
21  
22 comprising participants from multiple nations (six countries), which suggests the evidence is robust and more  
23  
24 generalizable. The data was collected from a large sample compared to previous similar studies from different  
25  
26 countries. Second, the research used a validated questionnaire and a non-biased recruitment process, which  
27  
28 provided reassurance of the quality of the study and the findings reported<sup>40</sup>. However, there are some limitations.  
29  
30 The study design itself, a cross-sectional survey design, limited our ability to identify causality between study  
31  
32 variables. A further limitation of the current study was the small number of participants from some of the  
33  
34 participating countries (Qatar; n= 61, and Kuwait; n= 134), and the dominance of the sample size by students  
35  
36 from only two countries Jordan (39.9%) and Saudi Arabia (19.7%). However, due to the small population size in  
37  
38 Qatar and Kuwait, and knowing that we recruited students from the only two available faculties of pharmacy in  
39  
40 these two countries, we assume that these small numbers are sufficient to draw conclusions from. Future research  
41  
42 should consider a wider range of countries during the recruitment phase to identify whether the findings can be  
43  
44 expanded. Finally, we were not able to estimate the response rate for our study, which might lead to nonresponse  
45  
46 bias, as we could not demonstrate how well the sample drawn from the population of interest. Therefore, the  
47  
48 findings should be interpreted carefully.

### 49 **Implications of Findings to Practice**

50  
51 The findings of this study can help curricula developers to focus on patient safety teaching and make it an essential  
52  
53 part of pharmacy curricula. Continuous educational sessions on patient safety and the reporting of errors in patient  
54  
55 care will help in raising the students' knowledge and awareness of patient safety and medical errors. In addition,  
56  
57 to ensure the quality of care and patient safety, it is important to provide clinical and senior supervision when  
58  
59 students are given tasks related to patient safety at all levels of the pharmacy program. Future studies to investigate  
60

1  
2  
3 the factors and attitudes of pharmacists and pharmacy students are warranted. Cultural and regional factors are  
4 important and must be taken into account when conducting future research. However, it is also important to  
5 mention that future research should also be conducted at the patient-level to study and explore patient safety from  
6 different perspectives.  
7  
8  
9

10  
11 In conclusion, the current study has revealed the positive attitudes of pharmacy students towards patient safety.  
12 There is currently a lack of research regarding the effect of pharmacy students' attitudes and the wider implications  
13 for practice. Patient safety should be covered explicitly during the pharmacy students' education and reinforced  
14 at each year of study within the curriculum to ensure that the next generation of pharmacists is equipped with the  
15 knowledge and behaviours to ensure good patient safety. An additional focus should be placed on the area of  
16 patient safety to investigate further the key findings of the current study.  
17  
18  
19  
20  
21  
22  
23  
24  
25  
26  
27  
28  
29  
30  
31  
32  
33  
34  
35  
36  
37  
38  
39  
40  
41  
42  
43  
44  
45  
46  
47  
48  
49  
50  
51  
52  
53  
54  
55  
56  
57  
58  
59  
60

### Author affiliations

<sup>1</sup> Faculty of Pharmacy, Isra University, Amman, Jordan (Naser)

<sup>2</sup> Department of Pharmacy Practice, Faculty of Pharmacy, Kuwait University, Kuwait, Kuwait (Alsairafi and Jeragh-Alhaddad)

<sup>3</sup> Department of Clinical Pharmacy and Practice, College of Pharmacy, QU Health, Qatar University, Doha, Qatar (Awaisu)

<sup>4</sup> Department of Pharmacology and Toxicology, Umm Alqura University, College of Medicine, Mecca, Saudi Arabia (Alwafi)

<sup>5</sup> Department of Biopharmaceutics and Clinical Pharmacy, Faculty of Pharmacy, The University of Jordan (Awwad)

<sup>6</sup> Department of Pharmaceutical Medicine, School of Pharmaceutical Education and Research, Jamia Hamdard, New Delhi, India (Hussain, Singh)

<sup>7</sup> Research Department of Practice and Policy, UCL School of Pharmacy, London, United Kingdom (Alsharif)

<sup>8</sup> Department of Pharmacy Practice, Faculty of Pharmacy, Princess Norah bint Abdul Rahman University, Kingdom of Saudi Arabia (Alsharif)

<sup>9</sup> Faculty of Pharmacy, Universitas Padjadjaran, Indonesia (Kautsar)

<sup>10</sup> Pharmacy Practice Department, Clinical Pharmacy College, King Faisal University, Alhasa, Saudi Arabia (AbuAlhommos)

<sup>11</sup> Department of Pharmaceutics, College of Pharmacy, Najran University, Najran, Saudi Arabia.

### Acknowledgments

This study was supported by Isra University (Amman, Jordan). We would like to thanks Saudi Ministry of Education for their support. In addition, the authors acknowledge Mohammad Alkharouf, Leena Abdullah, and Asma Almashayekh for helping in collection of data in Jordan.

### Contributors

The authors who contributed to the work described in this paper are as follows: Naser contributed to the study design. Naser, Alsairafi, Awaisu, Alwafi, Hussain, Awwad, Alsharif, and Kautsar conducted the study and

1  
2  
3 collected data. Naser conducted to the data analysis. Naser, Alsairafi, Alwafi, Awwad, Awaisu, and Dahmash  
4 were involved in interpretation of data. Naser, Alsairafi, Alwafi, Awwad, Awaisu, and Dahmash wrote the first  
5 draft of the article. All authors reviewed the manuscript for important intellectual content and provided final  
6 approval of the version to be published. All authors agreed to be accountable for all aspects of the work in ensuring  
7 that questions related to the accuracy or integrity of any part of the work are appropriately investigated and  
8 resolved.  
9

#### 14 **Funding**

15 No fund was received for this study  
16  
17

#### 18 **Competing interests**

19 None declared.  
20  
21

#### 22 **Patient consent**

23 Not required.  
24  
25

#### 26 **Ethics approval**

27 Ethical approval for this study was obtained from the research ethics committees of the participating universities.  
28  
29 Permission and approval for the use of the study questionnaire were acquired from the corresponding author of  
30 the original study.  
31  
32

#### 33 **Provenance and peer review**

34 Not commissioned; externally peer reviewed.  
35  
36

#### 37 **Data sharing statement**

38 No additional data are available.  
39  
40  
41  
42  
43  
44  
45  
46  
47  
48  
49  
50  
51  
52  
53  
54  
55  
56  
57  
58  
59  
60

## References

1. World Health Organization. Patient safety. *Education and training* 2020; <https://www.who.int/patientsafety/education/en/>, 2020.
2. Frush K. Fundamentals of a patient safety program. . *Pediatr Radiol.* 2008;38(4):S685 – 689.
3. Elmontsri M, Almashrafi A, Banarsee R, Majeed A. Status of patient safety culture in Arab countries: a systematic review. *BMJ Open.* 2017;7(2):e013487.
4. Elmontsri M, Banarsee R, Majeed A. Improving patient safety in developing countries - moving towards an integrated approach. *JRSM Open.* 2018;9(11):2054270418786112.
5. Tregunno D, Ginsburg L, Clarke B, Norton P. Integrating patient safety into health professionals' curricula: a qualitative study of medical, nursing and pharmacy faculty perspectives. *BMJ Qual Saf.* 2014;23(3):257-264.
6. Carruthers S, Lawton R, Sandars J, Howe A, Perry M. Attitudes to patient safety amongst medical students and tutors: Developing a reliable and valid measure. *Med Teach.* 2009;31(8):370 - 376.
7. Hindle D, Braithwaite J, Iedema R. The Centre for Clinical Governance Research, Patient Safety Research: A review of the technical literature. . In. Sydney: University of New South Wales; 2005.
8. Teigland C, Blasiak R, Wilson L, Hines R, Meyerhoff K, Viera A. Patient safety and quality improvement education: a cross sectional study of medical students' preferences and attitudes. *BMC Med Educ.* 2013;13(16):1 - 6.
9. Unmet Needs: Teaching Physicians to Provide Safe Patient Care. [press release]. Boston, MA: National Patient Safety Foundation 2010.
10. Department of Health. *Modernising Medical Careers. The New Curriculum for the Foundation Years in Postgraduate Education and Training.* London, UK: Department of Health;2007.
11. American Association of Colleges of Nursing. Hallmarks of quality and patient safety: recommended baccalaureate competencies and curricular guidelines to ensure high-quality and safe patient care. *J Prof Nurs.* 2006;22:329 - 330.
12. Cronenwett L, Sherwood G, Barnsteiner J, et al. Quality and safety education for nurses. *Nurs Outlook.* 2007;55(3):122 - 131.
13. Frank J, Brien S. *The Safety Competencies: Enhancing Patient Safety Across the Health Professions.* Ottawa, ON: Canadian Patient Safety Institute;2008.

- 1
  - 2
  - 3
  - 4
  - 5
  - 6
  - 7
  - 8
  - 9
  - 10
  - 11
  - 12
  - 13
  - 14
  - 15
  - 16
  - 17
  - 18
  - 19
  - 20
  - 21
  - 22
  - 23
  - 24
  - 25
  - 26
  - 27
  - 28
  - 29
  - 30
  - 31
  - 32
  - 33
  - 34
  - 35
  - 36
  - 37
  - 38
  - 39
  - 40
  - 41
  - 42
  - 43
  - 44
  - 45
  - 46
  - 47
  - 48
  - 49
  - 50
  - 51
  - 52
  - 53
  - 54
  - 55
  - 56
  - 57
  - 58
  - 59
  - 60
14. Schumacher D, Slovin S, Riebschleger M, Englander R, Hicks P, Carraccio C. Perspective: beyond counting hours: the importance of supervision, professionalism, transitions of care, and workload in residency training. *Acad Med.* 2012;87(7):883 - 888.
15. World Health Organization. The WHO patient safety curriculum guide for medical schools. 2009; <https://apps.who.int/iris/handle/10665/44091>, 2020.
16. World Health Organization. Multi-professional Patient Safety Curriculum Guide. [press release]. WHO Press 2011.
17. Marriott J, Nation R, Roller L, et al. Pharmacy education in the context of Australian practice. *Am J Pharm Educ.* 2008;72(6):1-18.
18. Kiersma M, Darbishire P, Plake K, Oswald C, Walters B. Laboratory Session to Improve First-year Pharmacy Students' Knowledge and Confidence Concerning the Prevention of Medication Errors *Am J Pharm Educ.* 2009;73(6):1 - 8.
19. Sukkari S, Sasich L, Tuttle D, Abu-Baker A, Howell H. Development and evaluation of a required patient safety course. *Am J Pharm Educ.* 2008;72(3):1 - 10.
20. Lin K, Travlos D, Wadelin J, Vlasses P. Simulation and introductory pharmacy practice experiences. *Am J Pharm Educ.* 2011;75(10):1 - 13.
21. Wilson RM, Michel P, Olsen S, et al. Patient safety in developing countries: retrospective estimation of scale and nature of harm to patients in hospital. *BMJ.* 2012;344:e832.
22. Leotsakos A, Ardolino A, Cheung R, Zheng H, Barraclough B, Walton M. Educating future leaders in patient safety. *J Multidiscip Healthc.* 2014;7:381-388.
23. Bloom S. The medical school as a social organization: the sources of resistance to change. *Med Educ.* 1989;23:228 - 241.
24. Nie Y, Li L, Duan Y, et al. Patient safety education for undergraduate medical students: a systematic review. *BMC Med Educ.* 2011;11:33.
25. Wong B, Etchells E, Kuper A, Levinson W, Shojania K. Teaching quality improvement and patient safety to trainees: a systematic review. *Acad Med.* 2010;85(9):1425 - 1439.
26. Kane J. Patient safety education: overreported and still lacking. *Acad Med.* 2010;85:1397 - 1398.
27. Alper E, Rosenberg E, O'Brien K, Fischer M, Durning S. Patient safety education at U.S. and Canadian medical Schools: results from the 2006 Clerkship Directors in Internal Medicine Survey. *Acad Med.* 2009;84(1672 - 1676.).

- 1  
2  
3 28. Castel E, Ginsburg L. *Patient Safety in Health Professional Education: Development of a Questionnaire*  
4 *to Assess Student Learning*.: The Canadian Patient Safety Institute.;2008.  
5  
6  
7 29. Candace S. Students' Attitudes: The "Other" Important Outcome in Statistics Education Paper presented  
8 at: Joint Statistics Meetings2003; San Francisco.  
9  
10 30. Ginsburg LR, Tregunno D, Norton PG. Self-reported patient safety competence among new graduates  
11 in medicine, nursing and pharmacy. *BMJ Qual Saf*. 2013;22(2):147-154.  
12  
13 31. Bentler P, Speckart G. Attitudes "cause" behaviors: a structural equation analysis. *J Pers Soc Psychol*.  
14 1981;40:226 - 238.  
15  
16 32. Madigosky W, Headrick L, Nelson K, Cox K, Anderson T. Changing and sustaining medical students'  
17 knowledge, skills, and attitudes about patient safety and medical fallibility. *Acad Med*. 2006;81(1):94 -  
18 101.  
19  
20 33. Leung G, Patil N. Patient safety in the undergraduate curriculum: medical students' perception. *Hong*  
21 *Kong Med J* 2010;16(2):101 - 105.  
22  
23 34. Halbach J, Sullivan L. Teaching medical students about medical errors and patient safety: evaluation of  
24 a required curriculum. *Acad Med*. 2005;80(6):600 - 606.  
25  
26 35. Schnall R, Stone P, Currie L, Desjardins K, John R, Bakken S. Development of a self-report instrument  
27 to measure patient safety attitudes, skills, and knowledge. *J Nurs Scholarsh*. 2008;40(4):391 - 394.  
28  
29 36. Flin R, Patey R, Jackson J, Mearns K, Dissanayaka U. Year 1 medical undergraduates' knowledge of  
30 and attitudes to medical error. *Med Educ* 2009;43(12):1147 - 1155.  
31  
32 37. Dudas R, Bundy D, Miller M, M. B. Can teaching medical students to investigate medication errors  
33 change their attitudes towards patient safety? *BMJ Qual Saf*. 2011;20(4):319 - 325.  
34  
35 38. Moskowitz E, Veloski J, Fields S, Nash D. Development and evaluation of a 1-day interclerkship  
36 program for medical students on medical errors and patient safety. *Am J Med Qual* 2007;22(1):13 - 17.  
37  
38 39. Kiersma M, Plake K, Darbishire P. Patient safety instruction in US health professions education. *Am J*  
39 *Pharm Educ* 2011;75(8):1 - 12.  
40  
41 40. Walpola RL, Fois RA, Carter SR, McLachlan AJ, Chen TF. Validation of a survey tool to assess the  
42 patient safety attitudes of pharmacy students. *BMJ Open*. 2015;5(9):e008442.  
43  
44 41. World Health Organization. Foodborne Disease Outbreaks. Guidelines for Investigation and Control.  
45 2017; [http://www.who.int/foodsafety/publications/foodborne\\_disease/Annex\\_4.pdf](http://www.who.int/foodsafety/publications/foodborne_disease/Annex_4.pdf) 2019.  
46  
47  
48  
49  
50  
51  
52  
53  
54  
55  
56  
57  
58  
59  
60

- 1  
2  
3 42. Farmer K. Methods for measuring and monitoring medication regimen adherence in clinical trials and  
4 clinical practice. *Clin Ther.* 1999;21(6):1074 -1090.  
5  
6  
7 43. MacCallum R, Widaman K, Zhang K, Sehee S. Sample size in factor analysis. *Psychol Methods.*  
8  
9 1999;4(1):84 - 99.  
10  
11 44. Dornyei Z. *Research methods in applied linguistics.* . New York2007.  
12  
13 45. Mathers N, Fox N, Hunn A. *Surveys and Questionnaires.* . The NIHR RDS for the East Midlands;2007.  
14  
15 46. Smith F. *Research Methods in Pharmacy Practice.* London2002.  
16  
17 47. Tegegn H, Abebe T, Ayalew M, Bhagavathula A. Patient safety attitudes of pharmacy students in an  
18 Ethiopian university: a cross-sectional study. *Drug Healthc Patient Saf.* 2017;2017(9):19 - 24.  
19  
20 48. Bari A, Jabeen U, Bano I, Rathore AW. Patient safety awareness among postgraduate students and nurses  
21 in a tertiary health care facility. *Pak J Med Sci.* 2017;33(5):1059-1064.  
22  
23 49. Nabilou B, Feizi A, Seyedin H. Patient Safety in Medical Education: Students' Perceptions, Knowledge  
24 and Attitudes. *PLoS One.* 2015;10(8):e0135610.  
25  
26 50. Fuji K, Paschal K, Galt K, Abbott A. Pharmacy student attitudes toward an interprofessional patient  
27 safety course: an exploratory mixed methods study. *Curr Pharm Teach Learn* 2010;2(4):238 - 247.  
28  
29 51. Sherwood G, Drenkard K. Quality and safety curricula in nursing education: Matching practice realities.  
30  
31 *Nurs Outlook.* 2007;55(3):151 - 155.  
32  
33 52. Shah N, Jawaid M, Shah N, Ali S. Patient safety: Perceptions of Medical Students of Dow Medical  
34 College ,Karachi *J Pak Med Assoc.* 2015;65(12):1261- 1265.  
35  
36 53. Al-Khaldi YM. Attitude of primary care physicians toward patient safety in Aseer region, Saudi Arabia.  
37  
38 *J Family Community Med.* 2013;20(3):153-158.  
39  
40 54. Gavaza P, Bui B. Pharmacy students' attitudes toward reporting serious adverse drug events. *Am J Pharm*  
41  
42 *Educ.* 2012;76(10):1- 8.  
43  
44  
45  
46  
47  
48  
49  
50  
51  
52  
53  
54  
55  
56  
57  
58  
59  
60



1  
2  
3 **Tables legends:**  
4

5 **Table 1** Pharmacy students' characteristics from each country.  
6

7 **Table 2** Pharmacy students mean attitude towards patient safety scores in individual subscales and total scale  
8 scores (n = 2,595).  
9

10 **Table 3** Pharmacy students' attitude towards patient safety score by students' characteristics (n = 2,595).  
11

12 **Table 4** Multiple regression analysis predicting students' attitude towards patients' safety.  
13  
14  
15  
16  
17  
18  
19  
20  
21  
22  
23  
24  
25  
26  
27  
28  
29  
30  
31  
32  
33  
34  
35  
36  
37  
38  
39  
40  
41  
42  
43  
44  
45  
46  
47  
48  
49  
50  
51  
52  
53  
54  
55  
56  
57  
58  
59  
60

**Tables:****Table 1** Pharmacy students' characteristics from each country.

| <b>Demographics</b>                                                                 | <b>Overall (n= 2,595)</b> | <b>Jordan (n= 1,044)</b> | <b>Saudi Arabia (n= 514)</b> | <b>Indonesia (n= 429)</b> | <b>India (n= 416)</b> | <b>Kuwait (n= 134)</b> | <b>Qatar (n= 61)</b> |
|-------------------------------------------------------------------------------------|---------------------------|--------------------------|------------------------------|---------------------------|-----------------------|------------------------|----------------------|
| <b>Gender No. (%)</b>                                                               |                           |                          |                              |                           |                       |                        |                      |
| Female                                                                              | 1,752 (67.5)              | 741 (71.0)               | 323 (62.8)                   | 388 (90.4)                | 124 (29.8)            | 115 (85.8)             | 61 (100)             |
| <b>Year of study No. (%)</b>                                                        |                           |                          |                              |                           |                       |                        |                      |
| First year                                                                          | 511 (19.7)                | 74 (7.1)                 | 9 (1.8)                      | 255 (59.4)                | 165 (39.7)            | 0 (0.0)                | 8 (13.1)             |
| Second year                                                                         | 407 (15.7)                | 148 (14.2)               | 21 (4.1)                     | 78 (18.2)                 | 108 (26.0)            | 32 (23.9)              | 20 (32.8)            |
| Third year                                                                          | 546 (21.0)                | 243 (23.3)               | 110 (21.4)                   | 60 (14.0)                 | 57 (13.7)             | 67 (50.0)              | 9 (14.8)             |
| Fourth year                                                                         | 679 (26.2)                | 319 (30.6)               | 232 (45.1)                   | 29 (6.8)                  | 64 (15.4)             | 22 (16.4)              | 13 (21.3)            |
| Fifth year                                                                          | 452 (17.4)                | 260 (24.9)               | 142 (27.6)                   | 7 (1.6)                   | 22 (5.3)              | 13 (9.7)               | 11 (18.0)            |
| <b>Prior healthcare experience No. (%)</b>                                          |                           |                          |                              |                           |                       |                        |                      |
| Yes                                                                                 | 990 (38.2)                | 448 (42.9)               | 281 (54.7)                   | 39 (9.1)                  | 141 (33.9)            | 49 (36.6)              | 32 (52.5)            |
| <b>Ever been involved in or witnessed harm to patients while practicing No. (%)</b> |                           |                          |                              |                           |                       |                        |                      |
| Yes                                                                                 | 712 (27.4)                | 249 (23.9)               | 230 (44.7)                   | 82 (19.1)                 | 110 (26.4)            | 28 (20.9)              | 13 (21.3)            |

**Table 2** Pharmacy students mean attitude towards patient safety scores in individual subscales and total scale scores (n = 2,595).

| Subscale                                                                     | Number of items | Range | Mean Score (SD) | Students score out of 100% |
|------------------------------------------------------------------------------|-----------------|-------|-----------------|----------------------------|
| Being quality improvement focused                                            | 4               | 0-16  | 12.1 (3.1)      | 75.6                       |
| Acceptability of questioning more senior healthcare professionals' behaviour | 2               | 0-8   | 5.6 (1.7)       | 70.0                       |
| Attitude towards open disclosure                                             | 2               | 0-8   | 5.5 (1.7)       | 68.8                       |
| Value of contextual learning                                                 | 3               | 0-12  | 8.2 (2.2)       | 68.3                       |
| Internalising errors regardless of harm                                      | 3               | 0-12  | 5.9 (3.2)       | 49.2                       |
| <b>Total Scale</b>                                                           | 14              | 0-56  | 37.4 (7.0)      | 66.8                       |

Abbreviation: SD, Standard deviation

**Table 3** Pharmacy students' attitude towards patient safety score by students' characteristics (n = 2,595).

| Variable                                                                    | Patients' safety scores |     |          |
|-----------------------------------------------------------------------------|-------------------------|-----|----------|
|                                                                             | Mean                    | SD  | P-value  |
| <b>Country</b>                                                              |                         |     |          |
| Jordan                                                                      | 38.9                    | 6.7 | 0.000*** |
| Saudi Arabia                                                                | 32.1                    | 7.0 |          |
| Indonesia                                                                   | 38.6                    | 5.3 |          |
| India                                                                       | 40.6                    | 5.5 |          |
| Kuwait                                                                      | 32.1                    | 6.6 |          |
| Qatar                                                                       | 36.2                    | 3.9 |          |
| <b>Gender</b>                                                               |                         |     |          |
| Male                                                                        | 36.6                    | 7.8 | 0.000*** |
| Female                                                                      | 37.7                    | 6.6 |          |
| <b>Year of study</b>                                                        |                         |     |          |
| First year                                                                  | 39.3                    | 6.1 | 0.000*** |
| Second year                                                                 | 37.8                    | 6.8 |          |
| Third year                                                                  | 37.0                    | 6.9 |          |
| Fourth year                                                                 | 36.4                    | 7.7 |          |
| Fifth year                                                                  | 36.8                    | 7.1 |          |
| <b>Prior healthcare experience</b>                                          |                         |     |          |
| Yes                                                                         | 36.8                    | 7.4 | 0.001**  |
| No                                                                          | 37.7                    | 6.8 |          |
| <b>Ever been involved in or witnessed harm to patients while practicing</b> |                         |     |          |
| Yes                                                                         | 36.2                    | 7.8 | 0.001**  |
| No                                                                          | 37.8                    | 6.7 |          |

\*\*p < 0.01

\*\*\*p < 0.001

Abbreviation: SD, Standard deviation

**Table 4** Multiple regression analysis predicting students' attitude towards patients' safety.

| Variable                                                         | Model <sup>a</sup> |       |          |
|------------------------------------------------------------------|--------------------|-------|----------|
|                                                                  | B                  | SE    | β        |
| Demographic data                                                 |                    |       |          |
| Females                                                          | 0.96               | 0.292 | 0.06**   |
| Year of study                                                    |                    |       |          |
| <b>Second year</b>                                               | -1.45              | 0.46  | -0.08**  |
| <b>Third year</b>                                                | -2.20              | 0.43  | -0.13*** |
| <b>Fourth year</b>                                               | -2.76              | 0.42  | -0.17*** |
| <b>Fifth year</b>                                                | -2.41              | 0.42  | -0.13*** |
| Having prior experience in healthcare                            |                    |       |          |
| <b>Yes</b>                                                       | 0.21               | 0.33  | 0.01     |
| Being involved in or witnessed harm to patients while practicing |                    |       |          |
| <b>Yes</b>                                                       | -1.17              | 0.33  | -0.07*** |
| Constant                                                         |                    |       |          |
| Adjusted R <sup>2</sup>                                          |                    |       | 0.030    |
| P-value                                                          |                    |       | 0.000    |

\*p < 0.05, \*\*p < 0.01, \*\*\*p < 0.001

a: includes gender, year of study, having prior experience in healthcare, and being involved in or witnessed harm to patients while practicing.

B: the average change in the dependent variable associated with a 1 unit change in the independent variable, statistically controlling for the other independent variables; SE: it is the standard deviation of its sampling distribution or an estimate of that standard deviation; β: a statistical measure that compares the strength of the effect of each individual independent variable to the dependent variable

1  
2  
3  
4  
5  
6  
7  
8  
9  
10  
11  
12  
13  
14  
15  
16  
17  
18  
19  
20  
21  
22  
23  
24  
25  
26  
27  
28  
29  
30  
31  
32  
33  
34  
35  
36  
37  
38  
39  
40  
41  
42  
43  
44  
45  
46

For peer review only

**STROBE 2007 (v4) Statement—Checklist of items that should be included in reports of *cross-sectional studies***

| Section/Topic                | Item # | Recommendation                                                                                                                                                                       | Reported on page # |
|------------------------------|--------|--------------------------------------------------------------------------------------------------------------------------------------------------------------------------------------|--------------------|
| <b>Title and abstract</b>    | 1      | (a) Indicate the study's design with a commonly used term in the title or the abstract                                                                                               | 1 and 2            |
|                              |        | (b) Provide in the abstract an informative and balanced summary of what was done and what was found                                                                                  | 2                  |
| <b>Introduction</b>          |        |                                                                                                                                                                                      |                    |
| Background/rationale         | 2      | Explain the scientific background and rationale for the investigation being reported                                                                                                 | 4 and 5            |
| Objectives                   | 3      | State specific objectives, including any prespecified hypotheses                                                                                                                     | 5                  |
| <b>Methods</b>               |        |                                                                                                                                                                                      |                    |
| Study design                 | 4      | Present key elements of study design early in the paper                                                                                                                              | 5                  |
| Setting                      | 5      | Describe the setting, locations, and relevant dates, including periods of recruitment, exposure, follow-up, and data collection                                                      | 5 and 6            |
| Participants                 | 6      | (a) Give the eligibility criteria, and the sources and methods of selection of participants                                                                                          | 5 and 6            |
| Variables                    | 7      | Clearly define all outcomes, exposures, predictors, potential confounders, and effect modifiers. Give diagnostic criteria, if applicable                                             | Not applicable     |
| Data sources/<br>measurement | 8*     | For each variable of interest, give sources of data and details of methods of assessment (measurement). Describe comparability of assessment methods if there is more than one group | 5, 6 and 7         |
| Bias                         | 9      | Describe any efforts to address potential sources of bias                                                                                                                            | Not applicable     |
| Study size                   | 10     | Explain how the study size was arrived at                                                                                                                                            | 5 and 6            |
| Quantitative variables       | 11     | Explain how quantitative variables were handled in the analyses. If applicable, describe which groupings were chosen and why                                                         | 7                  |
| Statistical methods          | 12     | (a) Describe all statistical methods, including those used to control for confounding                                                                                                | 7                  |
|                              |        | (b) Describe any methods used to examine subgroups and interactions                                                                                                                  | 7                  |
|                              |        | (c) Explain how missing data were addressed                                                                                                                                          | Not applicable     |
|                              |        | (d) If applicable, describe analytical methods taking account of sampling strategy                                                                                                   | Not applicable     |
|                              |        | (e) Describe any sensitivity analyses                                                                                                                                                | Not applicable     |
| <b>Results</b>               |        |                                                                                                                                                                                      |                    |

|                          |     |                                                                                                                                                                                                              |                |
|--------------------------|-----|--------------------------------------------------------------------------------------------------------------------------------------------------------------------------------------------------------------|----------------|
| Participants             | 13* | (a) Report numbers of individuals at each stage of study—eg numbers potentially eligible, examined for eligibility, confirmed eligible, included in the study, completing follow-up, and analysed            | 8              |
|                          |     | (b) Give reasons for non-participation at each stage                                                                                                                                                         | Not applicable |
|                          |     | (c) Consider use of a flow diagram                                                                                                                                                                           | Not applicable |
| Descriptive data         | 14* | (a) Give characteristics of study participants (eg demographic, clinical, social) and information on exposures and potential confounders                                                                     | 8 and 9        |
|                          |     | (b) Indicate number of participants with missing data for each variable of interest                                                                                                                          | Not applicable |
| Outcome data             | 15* | Report numbers of outcome events or summary measures                                                                                                                                                         | 8 -12          |
| Main results             | 16  | (a) Give unadjusted estimates and, if applicable, confounder-adjusted estimates and their precision (eg, 95% confidence interval). Make clear which confounders were adjusted for and why they were included | Not applicable |
|                          |     | (b) Report category boundaries when continuous variables were categorized                                                                                                                                    | Not applicable |
|                          |     | (c) If relevant, consider translating estimates of relative risk into absolute risk for a meaningful time period                                                                                             | Not applicable |
| Other analyses           | 17  | Report other analyses done—eg analyses of subgroups and interactions, and sensitivity analyses                                                                                                               | Not applicable |
| <b>Discussion</b>        |     |                                                                                                                                                                                                              |                |
| Key results              | 18  | Summarise key results with reference to study objectives                                                                                                                                                     | 12             |
| Limitations              | 19  | Discuss limitations of the study, taking into account sources of potential bias or imprecision. Discuss both direction and magnitude of any potential bias                                                   | 14             |
| Interpretation           | 20  | Give a cautious overall interpretation of results considering objectives, limitations, multiplicity of analyses, results from similar studies, and other relevant evidence                                   | 12-14          |
| Generalisability         | 21  | Discuss the generalisability (external validity) of the study results                                                                                                                                        | 14             |
| <b>Other information</b> |     |                                                                                                                                                                                                              |                |
| Funding                  | 22  | Give the source of funding and the role of the funders for the present study and, if applicable, for the original study on which the present article is based                                                | 17             |

\*Give information separately for cases and controls in case-control studies and, if applicable, for exposed and unexposed groups in cohort and cross-sectional studies.

**Note:** An Explanation and Elaboration article discusses each checklist item and gives methodological background and published examples of transparent reporting. The STROBE checklist is best used in conjunction with this article (freely available on the Web sites of PLoS Medicine at <http://www.plosmedicine.org/>, Annals of Internal Medicine at <http://www.annals.org/>, and Epidemiology at <http://www.epidem.com/>). Information on the STROBE Initiative is available at [www.strobe-statement.org](http://www.strobe-statement.org).

# BMJ Open

## Attitudes of pharmacy students towards patient safety: a cross-sectional study from six developing countries

|                                 |                                                                                                                                                                                                                                                                                                                                                                                                                                                                                                                                                                                                                                                                                                                                                                                                                                                                                                                                                                                                                                                                                                                                                                                                                                                                                                                                                                                                                                                            |
|---------------------------------|------------------------------------------------------------------------------------------------------------------------------------------------------------------------------------------------------------------------------------------------------------------------------------------------------------------------------------------------------------------------------------------------------------------------------------------------------------------------------------------------------------------------------------------------------------------------------------------------------------------------------------------------------------------------------------------------------------------------------------------------------------------------------------------------------------------------------------------------------------------------------------------------------------------------------------------------------------------------------------------------------------------------------------------------------------------------------------------------------------------------------------------------------------------------------------------------------------------------------------------------------------------------------------------------------------------------------------------------------------------------------------------------------------------------------------------------------------|
| Journal:                        | <i>BMJ Open</i>                                                                                                                                                                                                                                                                                                                                                                                                                                                                                                                                                                                                                                                                                                                                                                                                                                                                                                                                                                                                                                                                                                                                                                                                                                                                                                                                                                                                                                            |
| Manuscript ID                   | bmjopen-2020-039459.R1                                                                                                                                                                                                                                                                                                                                                                                                                                                                                                                                                                                                                                                                                                                                                                                                                                                                                                                                                                                                                                                                                                                                                                                                                                                                                                                                                                                                                                     |
| Article Type:                   | Original research                                                                                                                                                                                                                                                                                                                                                                                                                                                                                                                                                                                                                                                                                                                                                                                                                                                                                                                                                                                                                                                                                                                                                                                                                                                                                                                                                                                                                                          |
| Date Submitted by the Author:   | 10-Aug-2020                                                                                                                                                                                                                                                                                                                                                                                                                                                                                                                                                                                                                                                                                                                                                                                                                                                                                                                                                                                                                                                                                                                                                                                                                                                                                                                                                                                                                                                |
| Complete List of Authors:       | Naser, Abdallah; Isra University, Department of Applied Pharmaceutical Sciences and Clinical Pharmacy<br>Alsairafi, Zahra; Kuwait University, Department of Pharmacy Practice, Faculty of Pharmacy<br>Awaisu, Ahmed; Qatar University, Department of Clinical Pharmacy and Practice, College of Pharmacy, QU Health<br>Alwafi, Hassan; Umm Al-Qura University, Department of Pharmacology and Toxicology<br>Awwad, Oriana ; The University of Jordan, Department of Biopharmaceutics and Clinical Pharmacy<br>Dahmash, Eman; Isra University, Department of Applied Pharmaceutical Sciences and Clinical Pharmacy<br>Alyami, Hamad; Najran University, Department of Pharmaceutics, College of Pharmacy<br>Alsharif , Alaa ; UCL School of Pharmacy, Research Department of Practice and Policy, UCL School of Pharmacy; Princess Nora bint Abdul Rahman University, Department of Pharmacy Practice, Faculty of Pharmacy<br>Hussain, Salman; Jamia Hamdard, Department of Pharmaceutical Medicine, School of Pharmaceutical Education and Research<br>Singh, Avinash ; Jamia Hamdard, Department of Pharmaceutical Medicine, School of Pharmaceutical Education and Research<br>Jeragh-Alhaddad, Fatima ; Kuwait University, Department of Pharmacy Practice, Faculty of Pharmacy<br>Kautsar, Angga ; Universitas Padjadjaran, Faculty of Pharmacy<br>AbuAlhommos, Amal ; King Faisal University, Pharmacy Practice Department, Clinical Pharmacy College |
| <b>Primary Subject Heading</b>: | Medical education and training                                                                                                                                                                                                                                                                                                                                                                                                                                                                                                                                                                                                                                                                                                                                                                                                                                                                                                                                                                                                                                                                                                                                                                                                                                                                                                                                                                                                                             |
| Secondary Subject Heading:      | Public health, Health services research, Patient-centred medicine                                                                                                                                                                                                                                                                                                                                                                                                                                                                                                                                                                                                                                                                                                                                                                                                                                                                                                                                                                                                                                                                                                                                                                                                                                                                                                                                                                                          |
| Keywords:                       | MEDICAL EDUCATION & TRAINING, Health & safety < HEALTH SERVICES ADMINISTRATION & MANAGEMENT, Quality in health care < HEALTH SERVICES ADMINISTRATION & MANAGEMENT                                                                                                                                                                                                                                                                                                                                                                                                                                                                                                                                                                                                                                                                                                                                                                                                                                                                                                                                                                                                                                                                                                                                                                                                                                                                                          |
|                                 |                                                                                                                                                                                                                                                                                                                                                                                                                                                                                                                                                                                                                                                                                                                                                                                                                                                                                                                                                                                                                                                                                                                                                                                                                                                                                                                                                                                                                                                            |



1  
2  
3  
4  
5  
6  
7  
8  
9  
10  
11  
12  
13  
14  
15  
16  
17  
18  
19  
20  
21  
22  
23  
24  
25  
26  
27  
28  
29  
30  
31  
32  
33  
34  
35  
36  
37  
38  
39  
40  
41  
42  
43  
44  
45  
46  
47  
48  
49  
50  
51  
52  
53  
54  
55  
56  
57  
58  
59  
60

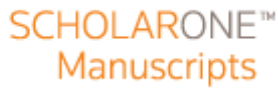

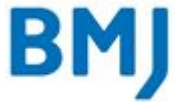

I, the Submitting Author has the right to grant and does grant on behalf of all authors of the Work (as defined in the below author licence), an exclusive licence and/or a non-exclusive licence for contributions from authors who are: i) UK Crown employees; ii) where BMJ has agreed a CC-BY licence shall apply, and/or iii) in accordance with the terms applicable for US Federal Government officers or employees acting as part of their official duties; on a worldwide, perpetual, irrevocable, royalty-free basis to BMJ Publishing Group Ltd ("BMJ") its licensees and where the relevant Journal is co-owned by BMJ to the co-owners of the Journal, to publish the Work in this journal and any other BMJ products and to exploit all rights, as set out in our [licence](#).

The Submitting Author accepts and understands that any supply made under these terms is made by BMJ to the Submitting Author unless you are acting as an employee on behalf of your employer or a postgraduate student of an affiliated institution which is paying any applicable article publishing charge ("APC") for Open Access articles. Where the Submitting Author wishes to make the Work available on an Open Access basis (and intends to pay the relevant APC), the terms of reuse of such Open Access shall be governed by a Creative Commons licence – details of these licences and which [Creative Commons](#) licence will apply to this Work are set out in our licence referred to above.

Other than as permitted in any relevant BMJ Author's Self Archiving Policies, I confirm this Work has not been accepted for publication elsewhere, is not being considered for publication elsewhere and does not duplicate material already published. I confirm all authors consent to publication of this Work and authorise the granting of this licence.

1  
2  
3 1 **Article title:** Attitudes of pharmacy students towards patient safety: a cross-sectional study from six developing  
4 countries  
5 2  
6

7 3 **Short-running title:** Attitudes of pharmacy students towards patient safety  
8  
9

10 4 **Authors' information:**  
11

12  
13 5 Abdallah Y Naser<sup>1</sup>, Zahra Khalil Alsairafi<sup>2</sup>, Ahmed Awaisu<sup>3</sup>, Hassan Alwafi<sup>4</sup>, Oriana Awwad<sup>5</sup>, Eman Zmaily  
14 Dahmash<sup>1</sup>, Hamad S. Alyami<sup>6</sup>, Alaa Alsharif<sup>7,8</sup>, Salman Hussain<sup>9</sup>, Avinash Kumar Singh<sup>9</sup>, Fatima B Jeragh-  
15 Alhaddad<sup>2</sup>, Angga Prawira Kautsar<sup>10</sup>, Amal Khaleel AbuAlhommos<sup>11</sup>,  
16  
17

18  
19 8 **Corresponding Author:** Dr. Abdallah Y Naser, Assistant Professor in Clinical Pharmacy and  
20 Pharmacoconomics, Department of Applied Pharmaceutical Sciences and Clinical Pharmacy, Faculty of  
21 Pharmacy, Isra University, Amman, Jordan (abdallah.naser@iu.edu.jo), 00962795285555  
22  
23 10  
24  
25

26 11

27 12

28 13

29 14

30 15

31 16

32 17

33 18

34 19

35 20

36 21

37 22

38 23

39 24

40 25

41 26

42 27

43 28

44 29

45 30

46 31

47 32

48 33

49 34

50 35

1  
2  
3 36 **ABSTRACT**

4  
5 37 **Objective:** To evaluate the attitudes of undergraduate pharmacy students towards patient safety in six developing  
6  
7 38 countries.

8  
9 39 **Design:** A cross-sectional study.

10  
11 40 **Setting:** Participants were enrolled from the participating universities in six countries.

12  
13 41 **Participants:** Undergraduate pharmacy students from the participating universities in six developing countries  
14  
15 42 (Jordan, Saudi Arabia, Kuwait, Qatar, India and Indonesia) were invited to participate in the study between  
16  
17 43 October 2018 and September 2019.

18  
19 44 **Primary outcome:** Attitudes towards patient safety was measured using 14-item questionnaire that contained  
20  
21 45 five subscales: being quality-improvement focused, internalising errors regardless of harm, value of contextual  
22  
23 46 learning, acceptability of questioning more senior healthcare professionals' behaviour, and attitude towards open  
24  
25 47 disclosure. Multiple-linear regression analysis was used to identify predictors of positive attitudes towards patient  
26  
27 48 safety.

28  
29 49 **Results:** A total of 2,595 students participated in this study (1,044 from Jordan, 514 from Saudi Arabia, 134 from  
30  
31 50 Kuwait, 61 from Qatar, 416 from India and 429 from Indonesia). Overall, the pharmacy students reported a  
32  
33 51 positive attitude towards patient safety with a mean score of 37.4 (SD= 7.0) out of 56 (66.8%). The "being quality-  
34  
35 52 improvement focused" subscale had the highest score, 75.6%. The subscale with the lowest score was  
36  
37 53 "internalising errors regardless of harm", 49.2%. Female students had significantly better attitudes towards patient  
38  
39 54 safety scores compared to male students ( $p=0.001$ ). Being at a higher level of study and involvement in or  
40  
41 55 witnessing harm to patients while practising were important predictors of negative attitudes towards patient safety  
42  
43 56 ( $p<0.001$ ).

44  
45 57 **Conclusion:** Patient safety content should be covered comprehensively in pharmacy curricula and reinforced in  
46  
47 58 each year of study. This should be more focused on students in their final year of study and who have started their  
48  
49 59 training. This will ensure that the next generation of pharmacists are equipped with the requisite knowledge, core  
50  
51 60 competencies and attitudes to ensure optimal patient safety when they practice.

51  
52 61 **Keywords:** Attitude; Patient; Pharmacy; Safety; Students.

53 62

54 63

55 64

56 65

57 66

58 67

59 68

60 69

### 66 **Strengths and limitations of this study**

- 67 • This is the first study comprising participants from multiple countries to investigate the attitudes of  
68 undergraduate pharmacy students towards patient safety in the Middle East region.
- 69 • We were not able to estimate the response rate for our study, which might have led to nonresponse bias.
- 70 • The study sample was mainly dominated by students from two countries (Jordan and Saudi Arabia),  
71 while there was a small number of participants from Qatar and Kuwait.

For peer review only

## 96 INTRODUCTION

97 Patient safety is one of the main concerns of healthcare systems during the provision of healthcare services and is  
98 increasingly being used as a measure of healthcare quality. The World Health Organization (WHO) has stressed  
99 the importance of reducing healthcare errors and establishing action plans to reduce patient harm and increase  
100 patient safety <sup>1</sup>. Medical errors are associated with high probability of patients harm and high mortality rate which  
101 raised the need for strategies that are evidence-based to enhance patient safety <sup>2</sup>. Research results revealed that  
102 around 10.0% of patients admitted to hospital within developed countries have a chance of being harmed, and up  
103 to 18.0% of hospital admissions experienced adverse events. Besides, there is a growing concern pertinent to the  
104 level of harm among patients in developing countries that could be attributed to the lack of accountability <sup>3-5</sup>.  
105 One of the best strategies to promote safer attitudes towards patient safety is education <sup>6,7</sup>. Patient safety education  
106 for undergraduate healthcare students has been considered a crucial element in minimising patient harm and  
107 developing a positive patient safety culture <sup>8</sup>. Several key international organisations have made recommendations  
108 to reshape healthcare professional education curricula to guarantee that they foster students' attitudes toward  
109 patient safety through enhancing their knowledge, skills and attitudes <sup>9-14</sup>. In recent years, pharmacy degree  
110 programmes have included content related to patient safety through curriculum guides <sup>5</sup>, including the WHO's  
111 Patient Safety Curriculum Guide for Medical Schools <sup>15</sup> and their Multiprofessional Patient Safety Curriculum  
112 Guide <sup>16-19</sup>. Pharmacy students, in developing countries, gain some practical experience in healthcare settings at  
113 an earlier stage of their studies, either through experiential education placements or simulation-based programs  
114 <sup>20</sup>. However, unlike other healthcare professions, pharmacists' training is not well structured and does not mandate  
115 close monitoring of students during their training by preceptors. Although patient-centred care and patient safety  
116 might have been embedded through the curriculum, it has been mostly informal and theoretical <sup>4,5,21</sup>.  
117 Unfortunately, there is no recent studies that described the curricula in the Middle Eastern countries, However, a  
118 study in 2008, in Jordan reported that curricula at various pharmacy schools covers only 20% of allocated credit  
119 hours in pharmaceutical care which covers elements of patient safety. A study with sample of government and  
120 private universities in Jordan concluded that none of the evaluated universities had adopted a structured patient-  
121 oriented training for students <sup>22</sup>. In Qatar, the pharmacy practice focuses mainly on medication dispensing, and  
122 patient care that includes patient safety is still in its infancy <sup>23</sup>. Similar situations are present in Kuwait and Saudi  
123 Arabia where pharmaceutical care is only a focused in Pharm D program not the BSc Pharmacy program <sup>24</sup>. The  
124 situation in India is not widely different, there is no standard curriculum and it varies across universities. Most  
125 pharmacy school's education is away from practice sites and compulsory training is not required <sup>25</sup>. In Indonesia,

1  
2  
3 126 recent study in 2020 revealed that the provision of the pharmaceutical care that covers patient centered care and  
4  
5 127 safety by community pharmacists in Malaysia is minimal <sup>26</sup>.

6  
7 128 In developing countries, there are cultural concerns, where pharmacy students are intimidated by other healthcare  
8  
9 129 professionals particularly, physicians, when they are in the clinical practice setting which will hamper patient  
10  
11 130 safety. The 'hierarchical difference in medical knowledge' will make young pharmacists' reluctance to question  
12  
13 131 decisions made by physicians <sup>5,27</sup>. Therefore, improving patient safety in developing countries requires changing  
14  
15 132 attitude particularly in shifting the blame culture in healthcare settings.

16  
17 133 Efforts to foster patient safety in developing countries must be augmented and education systems during  
18  
19 134 undergraduate level must provide knowledge to improve patient safety <sup>27</sup>.

20  
21 135 Despite the increasing effort to enhance patient safety through improving healthcare professional curricula, this  
22  
23 136 improvement is considered challenging, and progress is very slow <sup>5,12,13,28-33</sup>. Developing positive attitudes among  
24  
25 137 university students is important as it is positively related to their achievement <sup>34</sup>. The accomplishment of  
26  
27 138 educational goals related to delivering safe and quality healthcare services requires students to have positive  
28  
29 139 attitudes towards patient safety <sup>34,35</sup>. Since attitude can substantially impact an individual's behaviour and practice  
30  
31 140 <sup>36</sup>, it is crucial that pharmacy students' attitudes towards patient safety are understood and evaluated particularly  
32  
33 141 in developing countries.

34  
35 142 Previous studies have explored the attitudes and values of healthcare students towards patient safety in different  
36  
37 143 countries, using different instruments <sup>18,19,37-44</sup>. The most widely-used validated tool is the patient safety/medical  
38  
39 144 fallibility survey, which was originally developed by Madigosky et al. for use among medical students <sup>37</sup>. This  
40  
41 145 tool was validated to assess the patient safety attitudes of pharmacy students by Walpola et al. <sup>45</sup>. However, there  
42  
43 146 are a limited number of studies that have focused on attitudes of undergraduate pharmacy students towards patient  
44  
45 147 safety, especially in developing countries. Therefore, the aim of this study was to evaluate the attitudes of  
46  
47 148 undergraduate pharmacy students towards patient safety in six developing countries.

## 47 149 **METHODS**

### 48 49 150 **Study design**

50  
51 151 A quantitative cross-sectional survey using a self-administered questionnaire was conducted to explore patient  
52  
53 152 safety attitudes and values among pharmacy students in six developing countries (Jordan, Saudi Arabia, Kuwait,  
54  
55 153 Qatar, India and Indonesia). To achieve the study aim, a self-administered questionnaire approach was adopted.  
56  
57 154 This approach has the advantage of being easily administered to a large number of participants within a short time  
58  
59 155 period, eliminating interviewer bias <sup>46</sup>. In addition, this technique can easily explain students' behaviour <sup>47</sup>.

### 156 **Sample size**

157 Based on the original study conducted by Walpola et al.<sup>45</sup>, a sample size of 200 students from each country was  
158 considered adequately representative. The original study estimated the appropriate sample size based on  
159 Boomsma's method of estimating a minimum sample size to conduct a confirmatory factor analysis based on the  
160 number of items to number of factors ratio of the model<sup>48</sup>.

### 161 **Sampling strategy**

162 The study population included undergraduate pharmacy students across all professional years of study. A  
163 convenience sampling technique was used to recruit eligible participants as it was not feasible to determine a  
164 sampling frame in each of the six countries. This sampling technique is a type of non-probability sampling method,  
165 in which participants from the target population who met the inclusion criteria of the study were easily accessible  
166 due to geographical proximity, availability at a given time, or were willing to take part in the study<sup>49</sup>. Student  
167 recruitment was conducted by researchers (AN, OA) in Jordan, (A. Alsharif) in Saudi Arabia, (ZA) in Kuwait,  
168 (A. Awaisu) in Qatar, (SH) in India and (AK) in Indonesia. The questionnaire was administered either as a hard-  
169 copy or electronically to eligible participants in a consistent manner to reduce the risk of assessment bias. All the  
170 undergraduate pharmacy students in the participating universities were approached and invited to take part in the  
171 study. For students who agreed to participate, the questionnaire was administered either as a hard copy or  
172 electronically after the study aim and objectives had been explained.

### 173 **Survey instrument**

174 A previously validated questionnaire<sup>45</sup> was used in this study to explore the attitudes of undergraduate pharmacy  
175 students towards patient safety. This questionnaire was originally developed and validated by Walpola and  
176 colleagues, who validated an adaptation of Madigosky et al's questionnaire (the Patient Safety/Medical Fallibility  
177 Curriculum Survey)<sup>37</sup>, to evaluate attitudes and values of pharmacy students towards patient safety. Walpola et  
178 al.'s 14-item questionnaire comprised five subscales: (1) quality-improvement focused (four questions), (2)  
179 internalising errors regardless of harm (three questions), (3) value of contextual learning (three questions), (4)  
180 acceptability of questioning more senior healthcare professionals' behaviour (two questions), and (5) attitude  
181 towards open disclosure (two questions). The study questionnaire asked undergraduate pharmacy students about  
182 the degree of applicability of each item to them using a 5-point Likert scale. Response options ranged from 0 to  
183 4, where 0 meant "strongly disagree" and 4 meant "strongly agree". Three items (items numbered 5, 6, and 7)  
184 were negatively worded and, thus, were reversely scored during the analysis, where 0 meant "strongly agree" and  
185 4 meant "strongly disagree". The total possible score for the questionnaire ranged between 0 and 56 and could be



1  
2  
3 186 interpreted based on the mid-point of the highest possible score of the scale (equal to 28): the higher the score,  
4  
5 187 the better the attitude towards patient safety. Besides, the following data were collected: participant's gender, year  
6  
7 188 of study, prior practical experience in healthcare settings- if applicable, and involvement in an incident that  
8  
9 189 resulted in harm or potential harm as a result of receiving healthcare.

10  
11 190 The use of a pre-existing questionnaire has the advantage of using a validated and tested instrument, which  
12  
13 191 increases the reliability of measurement<sup>50</sup>. In addition, the use of an existing questionnaire allows for comparison  
14  
15 192 with different populations<sup>51</sup>. The mean score  $\pm$  SD for each item was calculated based on the student responses  
16  
17 193 using the 5-point Likert scale, which ranged between 0 and 4. In addition, the total mean score for each subscale  
18  
19 194 was calculated to allow comparison between different subscales.

### 20 195 **Validity and reliability of the survey instrument**

21  
22 196 Walpola's questionnaire was examined for its psychometric properties in 446 students<sup>45</sup>. The face and content  
23  
24 197 validity of the questionnaire were tested. In addition, exploratory factor analysis was conducted to test the  
25  
26 198 construct validity and the internal consistency of the questionnaire was examined. In addition, the original  
27  
28 199 investigators conducted focus groups among three populations: initially among five pharmacy academics, five  
29  
30 200 practising pharmacists and seven pharmacy student representatives to assess the face validity of the survey  
31  
32 201 instrument. Besides this, we examined Cronbach's alpha measures for the five factors in the questionnaire, which  
33  
34 202 ranged between 0.56 and 0.78. The overall Cronbach's alpha measure was 0.72. This identified the questionnaire  
35  
36 203 as having acceptable stability.

### 37 204 **Pre-testing of the questionnaire**

38  
39 205 A pilot study using the original questionnaire was conducted on 45 pharmacy students (from different Arab  
40  
41 206 nationalities) in Jordan, who met the inclusion criteria for the study. Students were asked about the clarity and  
42  
43 207 comprehensibility of the questionnaire, and if any of the questions were difficult to understand. Students  
44  
45 208 confirmed that the questionnaire was considered easy to understand and to complete.

### 46 209 **Data collection procedure**

47  
48  
49 210 In Jordan, we used hard copies of the questionnaire, and the recruitment of participants was conducted in two  
50  
51 211 universities (one private and one government). An electronic version of the questionnaire was used for the students  
52  
53 212 recruited in the other countries. In Saudi Arabia, the survey was distributed in three government universities. In  
54  
55 213 Indonesia, student recruitment was conducted in two government universities, while in India it was conducted in  
56  
57 214 five universities. In Kuwait and Qatar, the study was conducted in one government university in each country,  
58  
59 215 these being the only available ones that offer an undergraduate pharmacy degree program.

## 216 Patient and public involvement

217 Patients were not involved in any aspect of the design or conduct of this study.

## 218 Statistical analysis

219 Data were analysed using SPSS software, version 25 (IBM Corp, Armonk, NY, USA). Continuous variables were  
220 reported as mean ( $\pm$  standard deviation [SD]), while categorical variables were reported as frequencies and  
221 percentages. The Kolmogorov–Smirnov and Shapiro Wilk tests were used to check the normality of the data.  
222 Students' scores were interpreted as a continuous scale based on the scale midpoint, where scores above the  
223 midpoint represented more positive attitudes towards patient safety for that factor. The one-way ANOVA test and  
224 Pearson's correlation coefficient were used to compare the mean scores between different demographic groups  
225 and to analyse the correlation between continuous independent variables and students' scores, respectively.  
226 Tukey's HSD post-hoc test was conducted to identify the source of significant variation within each group.  
227 Additionally, significant predictors of positive attitudes towards patients' safety were determined using multiple  
228 linear regression analysis. A confidence interval of 95% ( $p < 0.05$ ) was applied to represent the statistical  
229 significance of the results, and the level of significance was predetermined as 5%.

## 230 RESULTS

### 231 Students' demographic characteristics

232 A total of 2,595 undergraduate pharmacy students participated in the study (Jordan = 1,044, Saudi Arabia = 514,  
233 Indonesia = 429, India = 416, Kuwait = 134 and Qatar = 61). About 67.0% ( $n = 1,752$ ) of the students were female.  
234 The majority of the respondents were recruited from Jordan ( $n = 1,044$ ; 39.9%), followed by Saudi Arabia ( $n =$   
235 514; 19.7%). An approximately similar percentage of participants were recruited from Indonesia ( $n = 429$ ; 16.5%)  
236 and India ( $n = 416$ ; 16.0%). The lowest percentages of participants came from Kuwait and Qatar, with only 5.2%  
237 ( $n = 134$ ) and 2.4% ( $n = 61$ ) being recruited from these two countries, respectively. This was expected due to the  
238 small population size and, thus, the small number of pharmacy students (Kuwait and Qatar only have one faculty  
239 of pharmacy each). The majority of the students were in their thirds and fourth year of study with 21.0% ( $n = 546$ )  
240 and 26.2% ( $n = 679$ ), respectively. Only 38.2% ( $n = 990$ ) of the participants reported that they had had prior or  
241 were undergoing current practical experience in a practice setting, with only 27.4% ( $n = 712$ ) of the participants  
242 have been involved in or have witnessed harm to patients while practicing. **Table 1** below summarises the  
243 demographic characteristics of the study participants from each country.

244 **Table 1** Pharmacy students' characteristics from each country.

| <b>Demographics</b>                                                                 | <b>Overall (n= 2,595)</b> | <b>Jordan (n= 1,044)</b> | <b>Saudi Arabia (n= 514)</b> | <b>Indonesia (n= 429)</b> | <b>India (n= 416)</b> | <b>Kuwait (n= 134)</b> | <b>Qatar (n= 61)</b> |
|-------------------------------------------------------------------------------------|---------------------------|--------------------------|------------------------------|---------------------------|-----------------------|------------------------|----------------------|
| <b>Gender No. (%)</b>                                                               |                           |                          |                              |                           |                       |                        |                      |
| Female                                                                              | 1,752 (67.5)              | 741 (71.0)               | 323 (62.8)                   | 388 (90.4)                | 124 (29.8)            | 115 (85.8)             | 61 (100)             |
| <b>Year of study No. (%)</b>                                                        |                           |                          |                              |                           |                       |                        |                      |
| First year                                                                          | 511 (19.7)                | 74 (7.1)                 | 9 (1.8)                      | 255 (59.4)                | 165 (39.7)            | 0 (0.0)                | 8 (13.1)             |
| Second year                                                                         | 407 (15.7)                | 148 (14.2)               | 21 (4.1)                     | 78 (18.2)                 | 108 (26.0)            | 32 (23.9)              | 20 (32.8)            |
| Third year                                                                          | 546 (21.0)                | 243 (23.3)               | 110 (21.4)                   | 60 (14.0)                 | 57 (13.7)             | 67 (50.0)              | 9 (14.8)             |
| Fourth year                                                                         | 679 (26.2)                | 319 (30.6)               | 232 (45.1)                   | 29 (6.8)                  | 64 (15.4)             | 22 (16.4)              | 13 (21.3)            |
| Fifth year                                                                          | 452 (17.4)                | 260 (24.9)               | 142 (27.6)                   | 7 (1.6)                   | 22 (5.3)              | 13 (9.7)               | 11 (18.0)            |
| <b>Prior healthcare experience No. (%)</b>                                          |                           |                          |                              |                           |                       |                        |                      |
| Yes                                                                                 | 990 (38.2)                | 448 (42.9)               | 281 (54.7)                   | 39 (9.1)                  | 141 (33.9)            | 49 (36.6)              | 32 (52.5)            |
| <b>Ever been involved in or witnessed harm to patients while practicing No. (%)</b> |                           |                          |                              |                           |                       |                        |                      |
| Yes                                                                                 | 712 (27.4)                | 249 (23.9)               | 230 (44.7)                   | 82 (19.1)                 | 110 (26.4)            | 28 (20.9)              | 13 (21.3)            |

### 246 Pharmacy students' attitude towards patient safety

247 The mean score of the participants for the total scale was 37.4 [SD= 7.0] out of 56 (the highest possible score),  
248 66.8%. The first subscale measured students' attitude in terms of "being quality-improvement focused". The  
249 participants' score was the highest for this scale, 75.6%. The lowest score was for the "internalising errors  
250 regardless of harm" subscale, 49.2%.

251 The highest mean score for the total scale was for India (40.6 (SD= 5.5), 72.5%). India had the highest subscale  
252 score for the subscale "value of contextual learning" (9.5 (SD= 1.7), 79.2%). Qatar had the highest subscale score  
253 for two subscales which are "being quality improvement focused" (13.9 (SD= 1.6), 86.9%) and "acceptability of  
254 questioning more senior healthcare professionals' behaviour" (6.5 (SD= 1.3), 81.3%). The score of the subscale  
255 "attitude towards open disclosure" was similar across students from Indonesia, India, and Qatar with a mean score  
256 that range between 6.0 (SD= 1.4) to 6.0 (SD= 1.7), 75.0%. Jordan had the highest subscale score for the subscale  
257 "internalising errors regardless of harm" (8.1 (SD= 2.6), 67.5%). **Table 2** summarizes these findings.

275 **Table 2** Pharmacy students mean attitude towards patient safety scores in individual subscales and total scale scores stratified by country (n = 2,595).

| Subscale                                                                     | Overall         |       |                 |                            | Jordan          |                            | Saudi Arabia    |                            | Indonesia       |                            | India           |                            | Kuwait          |                            | Qatar           |                            |
|------------------------------------------------------------------------------|-----------------|-------|-----------------|----------------------------|-----------------|----------------------------|-----------------|----------------------------|-----------------|----------------------------|-----------------|----------------------------|-----------------|----------------------------|-----------------|----------------------------|
|                                                                              | Number of items | Range | Mean Score (SD) | Students score out of 100% | Mean Score (SD) | Students score out of 100% | Mean Score (SD) | Students score out of 100% | Mean Score (SD) | Students score out of 100% | Mean Score (SD) | Students score out of 100% | Mean Score (SD) | Students score out of 100% | Mean Score (SD) | Students score out of 100% |
| Being quality improvement focused                                            | 4               | 0-16  | 12.1 (3.1)      | <b>75.6</b>                | 11.7 (2.8)      | <b>73.1</b>                | 10.4 (3.4)      | <b>65.0</b>                | 13.7 (1.9)      | <b>85.6</b>                | 13.4 (1.9)      | <b>83.8</b>                | 11.5 (4.5)      | <b>71.9</b>                | 13.9 (1.6)      | <b>86.9</b>                |
| Acceptability of questioning more senior healthcare professionals' behaviour | 2               | 0-8   | 5.6 (1.7)       | <b>70.0</b>                | 5.4 (1.6)       | <b>67.5</b>                | 4.9 (1.8)       | <b>61.3</b>                | 6.3 (1.4)       | <b>78.8</b>                | 6.3 (1.3)       | <b>78.8</b>                | 5.1 (2.2)       | <b>63.8</b>                | 6.5 (1.3)       | <b>81.3</b>                |
| Attitude towards open disclosure                                             | 2               | 0-8   | 5.5 (1.7)       | <b>68.8</b>                | 5.6 (1.7)       | <b>70.0</b>                | 4.7 (1.6)       | <b>58.8</b>                | 6.0 (1.7)       | <b>75.0</b>                | 6.0 (1.5)       | <b>75.0</b>                | 5.0 (2.0)       | <b>62.5</b>                | 6.0 (1.4)       | <b>75.0</b>                |
| Value of contextual learning                                                 | 3               | 0-12  | 8.2 (2.2)       | <b>68.3</b>                | 8.1 (2.0)       | <b>67.5</b>                | 7.1 (2.4)       | <b>59.2</b>                | 9.2 (1.8)       | <b>76.7</b>                | 9.5 (1.7)       | <b>79.2</b>                | 6.6 (2.3)       | <b>55.0</b>                | 8.0 (2.1)       | <b>66.7</b>                |
| Internalising errors regardless of harm                                      | 3               | 0-12  | 5.9 (3.2)       | <b>49.2</b>                | 8.1 (2.6)       | <b>67.5</b>                | 5.0 (2.7)       | <b>41.7</b>                | 3.4 (2.0)       | <b>28.3</b>                | 5.4 (2.8)       | <b>45.0</b>                | 3.9 (3.3)       | <b>32.5</b>                | 1.9 (1.5)       | <b>15.8</b>                |
| <b>Total Scale</b>                                                           | 14              | 0-56  | 37.4 (7.0)      | <b>66.8</b>                | 38.9 (6.7)      | <b>69.5</b>                | 32.1 (7.0)      | <b>57.3</b>                | 38.6 (5.3)      | <b>68.9</b>                | 40.6 (5.5)      | <b>72.5</b>                | 32.1 (6.6)      | <b>57.3</b>                | 36.2 (3.9)      | <b>64.6</b>                |

276

277 Abbreviation: SD, Standard deviation

278

279

280

281

282

283

284

285

286

287 **Effect of students' characteristics on their attitude towards patients' safety**

288 **Table 3** presents the effect of the students' demographics on their attitude towards patient safety scores. Students'  
 289 scores significantly differed by country, gender, year of study, having prior experience in healthcare and being  
 290 involved in or having witnessed harm to patients while practicing ( $p < 0.01$ ). Tukey's HSD post-hoc test confirmed  
 291 that all countries contributed to the significant difference in the mean score except Indonesia, and that Saudi  
 292 Arabia, Kuwait and India had the most significant contributions in this variation. Regarding the year of study  
 293 variable, the Tukey HSD test confirmed that all years of study contributed to the significant variation between  
 294 groups.

295 **Table 3** Pharmacy students' attitude towards patient safety score by students' characteristics (n= 2,595).

| Variable                                                                    | Patients' safety scores |     |          |
|-----------------------------------------------------------------------------|-------------------------|-----|----------|
|                                                                             | Mean                    | SD  | P-value  |
| <b>Country</b>                                                              |                         |     |          |
| Jordan                                                                      | 38.9                    | 6.7 | 0.000*** |
| Saudi Arabia                                                                | 32.1                    | 7.0 |          |
| Indonesia                                                                   | 38.6                    | 5.3 |          |
| India                                                                       | 40.6                    | 5.5 |          |
| Kuwait                                                                      | 32.1                    | 6.6 |          |
| Qatar                                                                       | 36.2                    | 3.9 |          |
| <b>Gender</b>                                                               |                         |     |          |
| Male                                                                        | 36.6                    | 7.8 | 0.000*** |
| Female                                                                      | 37.7                    | 6.6 |          |
| <b>Year of study</b>                                                        |                         |     |          |
| First year                                                                  | 39.3                    | 6.1 | 0.000*** |
| Second year                                                                 | 37.8                    | 6.8 |          |
| Third year                                                                  | 37.0                    | 6.9 |          |
| Fourth year                                                                 | 36.4                    | 7.7 |          |
| Fifth year                                                                  | 36.8                    | 7.1 |          |
| <b>Prior healthcare experience</b>                                          |                         |     |          |
| Yes                                                                         | 36.8                    | 7.4 | 0.001**  |
| No                                                                          | 37.7                    | 6.8 |          |
| <b>Ever been involved in or witnessed harm to patients while practicing</b> |                         |     |          |
| Yes                                                                         | 36.2                    | 7.8 | 0.001**  |
| No                                                                          | 37.8                    | 6.7 |          |

296 \*\* $p < 0.01$ , \*\*\* $p < 0.001$ , Abbreviation: SD, Standard deviation

297 Simple linear regression analysis showed that all demographic variables were significantly associated with a better  
 298 attitude towards patients' safety score ( $p < 0.01$ ). Multiple linear regression analysis showed that female students  
 299 had a better attitude towards patients' safety score ( $p = 0.001$ ). In addition, it showed that higher-level students  
 300 and being involved in or having witnessed harm to patients while practicing were associated with a slightly lower  
 301 score ( $p = 0.000$ ), **Table 4**.

**Table 4** Multiple regression analysis predicting students' attitude towards patients' safety.

| Variable                                                         | Model <sup>a</sup> |       |          |
|------------------------------------------------------------------|--------------------|-------|----------|
|                                                                  | B                  | SE    | $\beta$  |
| Demographic data                                                 |                    |       |          |
| Females                                                          | 0.96               | 0.292 | 0.06**   |
| Year of study                                                    |                    |       |          |
| <b>Second year</b>                                               | -1.45              | 0.46  | -0.08**  |
| <b>Third year</b>                                                | -2.20              | 0.43  | -0.13*** |
| <b>Fourth year</b>                                               | -2.76              | 0.42  | -0.17*** |
| <b>Fifth year</b>                                                | -2.41              | 0.42  | -0.13*** |
| Having prior experience in healthcare                            |                    |       |          |
| <b>Yes</b>                                                       | 0.21               | 0.33  | 0.01     |
| Being involved in or witnessed harm to patients while practicing |                    |       |          |
| <b>Yes</b>                                                       | -1.17              | 0.33  | -0.07*** |
| Constant                                                         |                    |       |          |
| Adjusted R <sup>2</sup>                                          |                    |       | 0.030    |
| P-value                                                          |                    |       | 0.000    |

\* $p < 0.05$ , \*\* $p < 0.01$ , \*\*\* $p < 0.001$

a: includes gender, year of study, having prior experience in healthcare, and being involved in or witnessed harm to patients while practicing.

B: the average change in the dependent variable associated with a 1 unit change in the independent variable, statistically controlling for the other independent variables; SE: it is the standard deviation of its sampling distribution or an estimate of that standard deviation;

$\beta$ : a statistical measure that compares the strength of the effect of each individual independent variable to the dependent variable

## DISCUSSION

The current study has identified the attitudes of undergraduate pharmacy students towards patients' safety. The sample was collected from different universities in different countries, across all years of study for the pharmacy program, and using a previously validated tool. The data was collected from a large sample compared to previous similar studies. For example, Carruthers et al. (2009) conducted a questionnaire-based study on 364 undergraduate medical students and 66 tutors from one medical school in the UK<sup>6</sup>, while Tegegn et al. conducted their study with a population of 83 students from a single university in Ethiopia<sup>52</sup>. Also, there were previous surveys conducted by Tegegn et al.<sup>52</sup> and Carruthers et al.<sup>6</sup> which did not obtain data on the nationality of the participants. This limited our ability to make direct comparisons between different nationalities settings. The results highlighted that, generally, a positive attitude towards patient safety was an important issue among pharmacy undergraduate students. There was a small but significant difference in attitudes between male and female pharmacy students. These results are comparable with those of another previous study<sup>52</sup>, where 86.7% of female respondents had an

1  
2  
3 322 overall positive attitude to patient safety compared to 83% of their male counterparts. Neither the previous nor  
4  
5 323 the current study was able to explain this difference, and a further study of attitudes of male and female students  
6  
7 324 towards patient safety is required to elucidate whether this is a real gender-influenced trait. Female students could  
8  
9 325 be more emotional and sensitive to patients' health outcomes, therefore, this would make them more proactive  
10  
11 326 and have stronger drive to act towards safer practices.

12  
13 327 Comparison in terms of patient safety elements revealed variations among countries. The first subscale focused  
14  
15 328 on "students being quality improvement focused" with results highlighting the superiority of Qatar, Indonesia,  
16  
17 329 and India over the other countries. Such difference could be attributed to students in these countries receiving  
18  
19 330 education more pertinent to patient safety and the science behind it that could cover medication errors, drug  
20  
21 331 adverse events and their effect in optimizing patient outcomes. Although there are no recent research indicating  
22  
23 332 that in these countries patient safety is fundamental in curricula, results reflect presence of such teaching modules,  
24  
25 333 where studies reported that integrating patient safety in curricula will improve student knowledge<sup>53</sup>. Similar  
26  
27 334 results were obtained in the second and third subscales which focused on addressing "the acceptability of  
28  
29 335 questioning more senior healthcare professionals' behaviour" and "attitude towards open disclosure" which  
30  
31 336 apparently put an emphasis on something that is a consequence of what has been taught. In these subscales the  
32  
33 337 scores were lower than the first subscale and this could be expected, where students attitude will enable them to  
34  
35 338 develop a culture of understanding and preventing errors from occurring<sup>45</sup>, which apparently requires practice  
36  
37 339 and elements that are beyond knowledge and hence the lower score of these two subscales were obtained when  
38  
39 340 compared to the first one.

40  
41 341 As for the fourth subscale "value of contextual learning", Indonesia and India scored the highest. Here the domain  
42  
43 342 is assessing the students belief in the need to the delivery of patient safety interventions and teaching materials  
44  
45 343<sup>45</sup>. Apparently, students who have good level of knowledge about patient safety will value the need to integrate  
46  
47 344 that into curricula and healthcare setting and hence the results reflected that. The last subscale assessed "students'  
48  
49 345 attitude pertinent to internalising errors regardless of harm", this subscale is related to the attitude of students in  
50  
51 346 internalising the error rather than taking action and this section provides good indication whether students would  
52  
53 347 manage risks and errors that could or not affect patients. Results showed that Jordan scored the highest among the  
54  
55 348 seven countries while Qatar scored the lowest. Although Jordan did not score the highest among the countries in  
56  
57 349 the first four subscales, it scored around the mean and none of the sections was below 67.0% indicating a positive  
58  
59 350 attitude towards patient safety. This last subscale is critical in fostering a patient safety culture. As this attitude is  
60  
351 related to the presence of transparency and willingness to reporting errors. Despite variations and slightly lower



1  
2  
3 352 scores, Jordan scores were above average and their score in the final subsection rated the highest among the seven  
4  
5 353 countries. Future research is required to assess the pharmacy curricula in developing countries. Interestingly,  
6  
7 354 students' attitude towards patient safety in Kuwait and Saudi Arabia, neighbouring countries with similar cultural  
8  
9 355 values, reported the lowest among the seven countries. The average of scores for the two countries showed results  
10  
11 356 that are shy above the 50% mark. It could be expected that in these two countries patient safety is still in its infancy  
12  
13 357 phase.

14 358 In the current study, there were two factors which have been negatively correlated with attitudes towards patient  
15  
16 359 safety; these are the 'year of study' and "being involved in or having witnessed harm to patients while practicing".  
17  
18 360 Similar findings were reported in a previous study and showed that students in their early years of study had  
19  
20 361 higher scores (a better attitude towards patient safety) compared to others in their final years of training <sup>54</sup>. This  
21  
22 362 could have arisen among the students due to a lack of formal and well-structured teaching on patient safety that  
23  
24 363 build up with years of study and have led to the reluctance to adopt patient safety practices. In addition, other  
25  
26 364 literature reported that professional socialisation plays a big role in shifting students' and interns' attitudes <sup>55</sup>,  
27  
28 365 which could be another important influencing factor. These results are inconsistent with another study's results  
29  
30 366 among pharmacy students in Ethiopia <sup>52</sup>. Such a difference between the studies could be due to variations in the  
31  
32 367 study settings, the recruited participants or, possibly, due to the greater emphasis allocated to teaching patient  
33  
34 368 safety to students in specific countries over others. A follow-up study focusing on the change in attitudes towards  
35  
36 369 the pharmacy teaching course is required. In addition, there is a need for the reinforcement towards patient safety  
37  
38 370 throughout the pharmacy program. This has also been recommended previously in studies about attitudes towards  
39  
40 371 patient safety among medical students <sup>6,56</sup>. In a previous study, medical students who had received education on  
41  
42 372 patient safety attached greater importance to this topic and had more confidence in reporting incidences of poor  
43  
44 373 patient safety <sup>6</sup>. Also, it has been highlighted previously that there is a lack of patient safety education among a  
45  
46 374 range of clinical disciplines, including medical, nursing and pharmacy students <sup>57,58</sup>. Patient safety education has  
47  
48 375 the potential to revolutionise the attitudes of pharmacists and pharmacists-in-training, which has broad  
49  
50 376 implications for practice <sup>57</sup>.

51 377 In addition to the importance of educating patient safety at the university level, there is a need for constant  
52  
53 378 reinforcement of messages regarding patient safety. In one study, it has been reported that some of the positive  
54  
55 379 messages regarding improving patient care, which were taught to second-year medical students, had been  
56  
57 380 forgotten after one year <sup>37</sup>. Those students were also less likely to be open about the errors they had witnessed and  
58  
59 381 less likely to believe that it was necessary to disclose errors that had not caused patient harm. Similarly, in the  
60

1  
2  
3 382 present study, it has been found that 49% of students agreed that errors should be internalised, regardless of harm  
4  
5 383 to patients. Pharmacy students in Ethiopia shared the same belief in reporting self-errors, where only half of the  
6  
7 384 students agreed, or strongly agreed, that pharmacists should report errors concerning a patient in situations where  
8  
9 385 harm had occurred <sup>52</sup>. A previous study in Pakistan that assessed the attitudes and perceptions of postgraduate  
10  
11 386 students towards patient safety reported consistent findings: that students felt less confident in reporting any error  
12  
13 387 other people had made in the work environment, no matter how serious the outcome had been for the patient <sup>54</sup>.  
14  
15 388 Many studies from different countries have reported that health care students have a common belief that medical  
16  
17 389 errors are inevitable, and that even very experienced people make medical errors <sup>54,56,59,60</sup>. Reporting medical  
18  
19 390 errors is important, and a failure to report such types of error indicates a lack of awareness of the risky  
20  
21 391 consequences of such practice to the healthcare services provided to the patients. This finding has an implication  
22  
23 392 for further research to understand the reasons for this behaviour; whether it is from a fear of reprisal from  
24  
25 393 colleagues or patients or a lack of recognition of reporting as part of the duty of care to patients. However,  
26  
27 394 incompatible results have been reported in North America, where the majority of students had positive attitudes  
28  
29 395 towards reporting serious errors when they encountered them, but they had inadequate knowledge about the  
30  
31 396 process of reporting them <sup>61</sup>. Also, in that study, it can be seen that some students had conflicting attitudes towards  
32  
33 397 reporting errors. They believed that reporting them would compromise inter-professional relationships, reduce the  
34  
35 398 patients' confidence in the healthcare system and interrupt the workflow.

### 399 **Strengths and weaknesses**

37  
38 400 The current study has many strengths. First, to the best of our knowledge, this study is the first large-scale study  
39  
40 401 comprising participants from multiple nations (six countries), which suggests the evidence is robust and more  
41  
42 402 generalizable. The data was collected from a large sample compared to previous similar studies from different  
43  
44 403 countries. Second, the research used a validated questionnaire and a non-biased recruitment process, which  
45  
46 404 provided reassurance of the quality of the study and the findings reported <sup>45</sup>. However, there are some limitations.  
47  
48 405 The study design itself, a cross-sectional survey design, limited our ability to identify causality between study  
49  
50 406 variables. A further limitation of the current study was the small number of participants from some of the  
51  
52 407 participating countries (Qatar; n= 61, and Kuwait; n= 134), and the dominance of the sample size by students  
53  
54 408 from only two countries Jordan (39.9%) and Saudi Arabia (19.7%). However, due to the small population size in  
55  
56 409 Qatar and Kuwait, and knowing that we recruited students from the only two available faculties of pharmacy in  
57  
58 410 these two countries, we assume that these small numbers are sufficient to draw conclusions from. Future research  
59  
60 411 should consider a wider range of countries during the recruitment phase to identify whether the findings can be

1  
2  
3 412 expanded. Finally, we were not able to estimate the response rate for our study, which might lead to nonresponse  
4  
5 413 bias, as we could not demonstrate how well the sample drawn from the population of interest. Therefore, the  
6  
7 414 findings should be interpreted carefully.

### 8 9 415 **Implications of Findings to Practice**

10 416 The findings of this study can help curricula developers to focus on patient safety teaching and make it an essential  
11  
12 417 part of pharmacy curricula. Continuous educational sessions on patient safety and the reporting of errors in patient  
13  
14 418 care will help in raising the students' knowledge and awareness of patient safety and medical errors. In addition,  
15  
16 419 to ensure the quality of care and patient safety, it is important to provide clinical and senior supervision when  
17  
18 420 students are given tasks related to patient safety at all levels of the pharmacy program. Future studies to investigate  
19  
20 421 the factors and attitudes of pharmacists and pharmacy students are warranted. Cultural and regional factors are  
21  
22 422 important and must be taken into account when conducting future research. However, it is also important to  
23  
24 423 mention that future research should also be conducted at the patient-level to study and explore patient safety from  
25  
26 424 different perspectives.

27  
28  
29 425 In conclusion, the current study has revealed the positive attitudes of pharmacy students towards patient safety.  
30  
31 426 There is currently limited number of research regarding the effect of pharmacy students' attitudes and the wider  
32  
33 427 implications for practice specifically, the Middle East and other developing countries. Patient safety should be  
34  
35 428 covered explicitly during the pharmacy students' education and reinforced at each year of study within the  
36  
37 429 curriculum to ensure that the next generation of pharmacists is equipped with the knowledge and behaviours to  
38  
39 430 ensure good patient safety. An additional focus should be placed on the area of patient safety to investigate further  
40  
41 431 the key findings of the current study.

42 432

43 433

44 434

45 435

46 436

47 437

48 438

49 439

50 440

51 441

1  
2  
3 442 **Author affiliations**  
4

5 443 <sup>1</sup> Faculty of Pharmacy, Isra University, Amman, Jordan (Naser)

6 444 <sup>2</sup> Department of Pharmacy Practice, Faculty of Pharmacy, Kuwait University, Kuwait, Kuwait (Alsairafi and  
7  
8 445 Jeragh-Alhaddad)

9 446 <sup>3</sup> Department of Clinical Pharmacy and Practice, College of Pharmacy, QU Health, Qatar University, Doha, Qatar  
10  
11 447 (Awaisu)

12 448 <sup>4</sup> Faculty of Medicine, Umm Alqura University, Mecca, Saudi Arabia (Alwafi)

13 449 <sup>5</sup> Department of Biopharmaceutics and Clinical Pharmacy, Faculty of Pharmacy, The University of Jordan  
14  
15 450 (Awwad)

16 451 <sup>6</sup> Department of Pharmaceutics, College of Pharmacy, Najran University, Najran, Saudi Arabia (Alyami)

17 452 <sup>7</sup> Research Department of Practice and Policy, UCL School of Pharmacy, London, United Kingdom (Alsharif)

18 453 <sup>8</sup> Department of Pharmacy Practice, College of Pharmacy, Princess Nourah bint Abdulrahman University, Riyadh,  
19  
20 454 Saudi Arabia (Alsharif)

21 455 <sup>9</sup> Department of Pharmaceutical Medicine, School of Pharmaceutical Education and Research, Jamia Hamdard,  
22  
23 456 New Delhi, India (Hussain, Singh)

24 457 <sup>10</sup> Faculty of Pharmacy, Universitas Padjadjaran, Indonesia (Kautsar)

25 458 <sup>11</sup> Pharmacy Practice Department, Clinical Pharmacy College, King Faisal University, Alhasa, Saudi Arabia  
26  
27 459 (AbuAlhommos).

28  
29  
30  
31  
32  
33 460 **Acknowledgments**

34 461 This study was supported by Isra University (Amman, Jordan). We would like to thanks Saudi Ministry of  
35  
36 462 Education for their support. Alaa Alsharif was funded by the Deanship of Scientific Research at Princess Nourah  
37  
38 463 bint Abdulrahman University through the Fast-track Research Funding Program. In addition, the authors  
39  
40 464 acknowledge Mohammad Alkharouf, Leena Abdullah, and Asma Almashayekh for helping in collection of data  
41  
42 465 in Jordan.

43 466

44 467

**468 Contributors**

469 The authors who contributed to the work described in this paper are as follows: Naser contributed to the study  
470 design. Naser, Alsairafi, Awaisu, Alwafi, Hussain, Awwad, Alsharif, and Kautsar conducted the study and  
471 collected data. Naser conducted to the data analysis. Naser, Alsairafi, Alwafi, Awwad, Awaisu, and Dahmash  
472 were involved in interpretation of data. Naser, Alsairafi, Alwafi, Awwad, Awaisu, and Dahmash wrote the first  
473 draft of the article. All authors reviewed the manuscript for important intellectual content and provided final  
474 approval of the version to be published. All authors agreed to be accountable for all aspects of the work in ensuring  
475 that questions related to the accuracy or integrity of any part of the work are appropriately investigated and  
476 resolved.

**477 Funding**

478 No fund was received for this study

**479 Competing interests**

480 None declared.

**481 Patient consent**

482 Not required.

**483 Ethics approval**

484 Ethical approval for this study was obtained from the research ethics committees (REC) of the participating  
485 universities in Jordan (REC at faculty of pharmacy at Isra University (PH – 2019 – 07), Saudi Arabia (Prince  
486 Norah bint Abdul Rahman University Institutional Review Board (19 – 0038), Kuwait (Health Sciences Centre  
487 Ethical Committee at Kuwait University (VDR/EC), Indonesia (REC of Universitas Padjadjaran  
488 (04/UN6.KEP/EC/2020), and India (ASPMCH/436/07/2019). Permission and approval for the use of the study  
489 questionnaire were acquired from the corresponding author of the original study.

**490 Provenance and peer review**

491 Not commissioned; externally peer reviewed.

**492 Data sharing statement**

493 No additional data are available.

494

495

496 **References**

497

- 498 1. World Health Organization. Patient safety. *Education and training* 2020;  
 499 <https://www.who.int/patientsafety/education/en/>, 2020.
- 500 2. Frush K. Fundamentals of a patient safety program. . *Pediatr Radiol*. 2008;38(4):S685 – 689.
- 501 3. Elmontsri M, Almashrafi A, Banarsee R, Majeed A. Status of patient safety culture in Arab  
 502 countries: a systematic review. *BMJ Open*. 2017;7(2):e013487.
- 503 4. Elmontsri M, Banarsee R, Majeed A. Improving patient safety in developing countries - moving  
 504 towards an integrated approach. *JRSM Open*. 2018;9(11):2054270418786112.
- 505 5. Tregunno D, Ginsburg L, Clarke B, Norton P. Integrating patient safety into health  
 506 professionals' curricula: a qualitative study of medical, nursing and pharmacy faculty  
 507 perspectives. *BMJ Qual Saf*. 2014;23(3):257-264.
- 508 6. Carruthers S, Lawton R, Sandars J, Howe A, Perry M. Attitudes to patient safety amongst  
 509 medical students and tutors: Developing a reliable and valid measure. *Med Teach*.  
 510 2009;31(8):370 - 376.
- 511 7. Hindle D, Braithwaite J, Iedema R. The Centre for Clinical Governance Research, Patient Safety  
 512 Research: A review of the technical literature. . In. Sydney: University of New South Wales;  
 513 2005.
- 514 8. Teigland C, Blasiak R, Wilson L, Hines R, Meyerhoff K, Viera A. Patient safety and quality  
 515 improvement education: a cross sectional study of medical students' preferences and  
 516 attitudes. *BMC Med Educ*. 2013;13(16):1 - 6.
- 517 9. Unmet Needs: Teaching Physicians to Provide Safe Patient Care. [press release]. Boston, MA:  
 518 National Patient Safety Foundation2010.
- 519 10. Department of Health. *Modernising Medical Careers. The New Curriculum for the Foundation  
 520 Years in Postgraduate Education and Training*. London, UK: Department of Health;2007.
- 521 11. American Association of Colleges of Nursing. Hallmarks of quality and patient safety:  
 522 recommended baccalaureate competencies and curricular guidelines to ensure high-quality  
 523 and safe patient care. *J Prof Nurs*. 2006;22:329 - 330.
- 524 12. Cronenwett L, Sherwood G, Barnsteiner J, et al. Quality and safety education for nurses. *Nurs  
 525 Outlook*. 2007;55(3):122 - 131.
- 526 13. Frank J, Brien S. *The Safety Competencies: Enhancing Patient Safety Across the Health  
 527 Professions*. Ottawa, ON: Canadian Patient Safety Institute;2008.
- 528 14. Schumacher D, Slovin S, Riebschleger M, Englander R, Hicks P, Carraccio C. Perspective:  
 529 beyond counting hours: the importance of supervision, professionalism, transitions of care,  
 530 and workload in residency training. *Acad Med*. 2012;87(7):883 - 888.
- 531 15. World Health Organization. The WHO patient safety curriculum guide for medical schools.  
 532 2009; <https://apps.who.int/iris/handle/10665/44091>, 2020.
- 533 16. World Health Organization. Multi-professional Patient Safety Curriculum Guide. [press  
 534 release]. WHO Press2011.
- 535 17. Marriott J, Nation R, Roller L, et al. Pharmacy education in the context of Australian practice.  
 536 *Am J Pharm Educ*. 2008;72(6):1-18.
- 537 18. Kiersma M, Darbshire P, Plake K, Oswald C, Walters B. Laboratory Session to Improve First-  
 538 year Pharmacy Students' Knowledge and Confidence Concerning the Prevention of  
 539 Medication Errors *Am J Pharm Educ*. 2009;73(6):1 - 8.
- 540 19. Sukkari S, Sasich L, Tuttle D, Abu-Baker A, Howell H. Development and evaluation of a required  
 541 patient safety course. *Am J Pharm Educ*. 2008;72(3):1 - 10.
- 542 20. Lin K, Travlos D, Wadelin J, Vlasses P. Simulation and introductory pharmacy practice  
 543 experiences. *Am J Pharm Educ*. 2011;75(10):1 - 13.
- 544 21. Wilson RM, Michel P, Olsen S, et al. Patient safety in developing countries: retrospective  
 545 estimation of scale and nature of harm to patients in hospital. *BMJ*. 2012;344:e832.

- 1  
2  
3 546 22. Albsoul AY, Wazaify M, Alkofahi A. Pharmaceutical Care Education and Practice in Jordan in  
4 547 the New Millennium. *Jordan Journal of Pharmaceutical Sciences*. 2008;1(1):83 - 90.
- 5 548 23. El Hajj MS, Hammad AS, Afifi HM. Pharmacy students' attitudes toward pharmaceutical care  
6 549 in Qatar. *Ther Clin Risk Manag*. 2014;10:121-129.
- 7 550 24. Al-Wazaify M, Matowe L, Albsoul-Younes A, Al-Omran OA. Pharmacy Education in Jordan,  
8 551 Saudi Arabia, and Kuwait. *American Journal of Pharmaceutical Education* 2006;70(1):1 - 4.
- 9 552 25. Basak SC, Sathyanarayana D. Pharmacy Education in India. *American Journal of*  
10 553 *Pharmaceutical Education* 2010;74(4):1 - 8.
- 11 554 26. Mehmood S, Hasan SMF, Razzakova CM, et al. Abstracts from the 1st JoPPP Conference on  
12 555 Pharmaceutical Policy and Practice. *Journal of Pharmaceutical Policy and Practice*.  
13 556 2020;13(S1).
- 14 557 27. Leotsakos A, Ardolino A, Cheung R, Zheng H, Barraclough B, Walton M. Educating future  
15 558 leaders in patient safety. *J Multidiscip Healthc*. 2014;7:381-388.
- 16 559 28. Bloom S. The medical school as a social organization: the sources of resistance to change. *Med*  
17 560 *Educ*. 1989;23:228 - 241.
- 18 561 29. Nie Y, Li L, Duan Y, et al. Patient safety education for undergraduate medical students: a  
19 562 systematic review. *BMC Med Educ*. 2011;11:33.
- 20 563 30. Wong B, Etchells E, Kuper A, Levinson W, Shojanian K. Teaching quality improvement and  
21 564 patient safety to trainees: a systematic review. *Acad Med*. 2010;85(9):1425 - 1439.
- 22 565 31. Kane J. Patient safety education: overreported and still lacking. *Acad Med*. 2010;85:1397 -  
23 566 1398.
- 24 567 32. Alper E, Rosenberg E, O'Brien K, Fischer M, Durning S. Patient safety education at U.S. and  
25 568 Canadian medical Schools: results from the 2006 Clerkship Directors in Internal Medicine  
26 569 Survey. *Acad Med*. 2009;84(1672 - 1676.).
- 27 570 33. Castel E, Ginsburg L. *Patient Safety in Health Professional Education: Development of a*  
28 571 *Questionnaire to Assess Student Learning*.: The Canadian Patient Safety Institute.;2008.
- 29 572 34. Candace S. Students' Attitudes: The "Other" Important Outcome in Statistics Education Paper  
30 573 presented at: Joint Statistics Meetings2003; San Francisco.
- 31 574 35. Ginsburg LR, Tregunno D, Norton PG. Self-reported patient safety competence among new  
32 575 graduates in medicine, nursing and pharmacy. *BMJ Qual Saf*. 2013;22(2):147-154.
- 33 576 36. Bentler P, Speckart G. Attitudes "cause" behaviors: a structural equation analysis. *J Pers Soc*  
34 577 *Psychol*. 1981;40:226 - 238.
- 35 578 37. Madigosky W, Headrick L, Nelson K, Cox K, Anderson T. Changing and sustaining medical  
36 579 students' knowledge, skills, and attitudes about patient safety and medical fallibility. *Acad*  
37 580 *Med*. 2006;81(1):94 - 101.
- 38 581 38. Leung G, Patil N. Patient safety in the undergraduate curriculum: medical students'  
39 582 perception. *Hong Kong Med J* 2010;16(2):101 - 105.
- 40 583 39. Halbach J, Sullivan L. Teaching medical students about medical errors and patient safety:  
41 584 evaluation of a required curriculum. *Acad Med*. 2005;80(6):600 - 606.
- 42 585 40. Schnall R, Stone P, Currie L, Desjardins K, John R, Bakken S. Development of a self-report  
43 586 instrument to measure patient safety attitudes, skills, and knowledge. *J Nurs Scholarsh*.  
44 587 2008;40(4):391 - 394.
- 45 588 41. Flin R, Patey R, Jackson J, Mearns K, Dissanayaka U. Year 1 medical undergraduates'  
46 589 knowledge of and attitudes to medical error. *Med Educ* 2009;43(12):1147 - 1155.
- 47 590 42. Dudas R, Bundy D, Miller M, M. B. Can teaching medical students to investigate medication  
48 591 errors change their attitudes towards patient safety? *BMJ Qual Saf*. 2011;20(4):319 - 325.
- 49 592 43. Moskowitz E, Veloski J, Fields S, Nash D. Development and evaluation of a 1-day interclerkship  
50 593 program for medical students on medical errors and patient safety. *Am J Med Qual*  
51 594 2007;22(1):13 - 17.
- 52 595 44. Kiersma M, Plake K, Darbishire P. Patient safety instruction in US health professions education.  
53 596 *Am J Pharm Educ* 2011;75(8):1 - 12.

- 1  
2  
3 597 45. Walpola RL, Fois RA, Carter SR, McLachlan AJ, Chen TF. Validation of a survey tool to assess  
4 598 the patient safety attitudes of pharmacy students. *BMJ Open*. 2015;5(9):e008442.  
5 599 46. World Health Organization. Foodborne Disease Outbreaks. Guidelines for Investigation and  
6 600 Control. 2017;  
7 601 [http://www.who.int/foodsafety/publications/foodborne\\_disease/Annex\\_4.pdf](http://www.who.int/foodsafety/publications/foodborne_disease/Annex_4.pdf) 2019.  
8 602 47. Farmer K. Methods for measuring and monitoring medication regimen adherence in clinical  
9 603 trials and clinical practice. *Clin Ther*. 1999;21(6):1074 -1090.  
10 604 48. MacCallum R, Widaman K, Zhang K, Sehee S. Sample size in factor analysis. *Psychol Methods*.  
11 605 1999;4(1):84 - 99.  
12 606 49. Dornyei Z. *Research methods in applied linguistics*. . New York 2007.  
13 607 50. Mathers N, Fox N, Hunn A. *Surveys and Questionnaires*. . The NIHR RDS for the East  
14 608 Midlands;2007.  
15 609 51. Smith F. *Research Methods in Pharmacy Practice*. London 2002.  
16 610 52. Tegegn H, Abebe T, Ayalew M, Bhagavathula A. Patient safety attitudes of pharmacy students  
17 611 in an Ethiopian university: a cross-sectional study. *Drug Healthc Patient Saf*. 2017;2017(9):19  
18 612 - 24.  
19 613 53. Gilligan AM, Myers, J., Nash, J. D., Lavigne, J. E., Moczygemba, L. R., Plake, K. S., Quiñones-  
20 614 Boex, A. C., Holdford, D., West-Strum, D., & Warholak, T. L. . Educating Pharmacy Students to  
21 615 Improve Quality (EPIQ) in Colleges and Schools of Pharmacy *American journal of*  
22 616 *pharmaceutical education*. 2012;76(6):1 - 7.  
23 617 54. Bari A, Jabeen U, Bano I, Rathore AW. Patient safety awareness among postgraduate students  
24 618 and nurses in a tertiary health care facility. *Pak J Med Sci*. 2017;33(5):1059-1064.  
25 619 55. Walpola RL, Fois RA, McLachlan AJ, Chen TF. Evaluating the Effectiveness of an Educational  
26 620 Intervention to Improve the Patient Safety Attitudes of Intern Pharmacists *American Journal*  
27 621 *of Pharmaceutical Education* 2017;81(1):1 - 7.  
28 622 56. Nabilou B, Feizi A, Seyedin H. Patient Safety in Medical Education: Students' Perceptions,  
29 623 Knowledge and Attitudes. *PLoS One*. 2015;10(8):e0135610.  
30 624 57. Fuji K, Paschal K, Galt K, Abbott A. Pharmacy student attitudes toward an interprofessional  
31 625 patient safety course: an exploratory mixed methods study. *Curr Pharm Teach Learn*  
32 626 2010;2(4):238 - 247.  
33 627 58. Sherwood G, Drenkard K. Quality and safety curricula in nursing education: Matching practice  
34 628 realities. *Nurs Outlook*. 2007;55(3):151 - 155.  
35 629 59. Shah N, Jawaid M, Shah N, Ali S. Patient safety: Perceptions of Medical Students of Dow  
36 630 Medical College ,Karachi *J Pak Med Assoc*. 2015;65(12):1261- 1265.  
37 631 60. Al-Khaldi YM. Attitude of primary care physicians toward patient safety in Aseer region, Saudi  
38 632 Arabia. *J Family Community Med*. 2013;20(3):153-158.  
39 633 61. Gavaza P, Bui B. Pharmacy students' attitudes toward reporting serious adverse drug events.  
40 634 *Am J Pharm Educ*. 2012;76(10):1- 8.  
41 635  
42  
43  
44  
45  
46  
47 636  
48  
49 637  
50  
51 638  
52  
53 639  
54  
55 640  
56  
57 641  
58  
59 642  
60



1  
2  
3 643 **Tables legends:**  
4

5 644 **Table 1** Pharmacy students' characteristics from each country.  
6

7 645 **Table 2** Pharmacy students mean attitude towards patient safety scores in individual subscales and total scale  
8  
9 646 scores stratified by country (n = 2,595).  
10

11 647 **Table 3** Pharmacy students' attitude towards patient safety score by students' characteristics (n = 2,595).  
12

13 648 **Table 4** Multiple regression analysis predicting students' attitude towards patients' safety.  
14

15 649  
16  
17  
18  
19  
20  
21  
22  
23  
24  
25  
26  
27  
28  
29  
30  
31  
32  
33  
34  
35  
36  
37  
38  
39  
40  
41  
42  
43  
44  
45  
46  
47  
48  
49  
50  
51  
52  
53  
54  
55  
56  
57  
58  
59  
60

For peer review only

**Tables:****Table 1** Pharmacy students' characteristics from each country.

| <b>Demographics</b>                                                                 | <b>Overall (n= 2,595)</b> | <b>Jordan (n= 1,044)</b> | <b>Saudi Arabia (n= 514)</b> | <b>Indonesia (n= 429)</b> | <b>India (n= 416)</b> | <b>Kuwait (n= 134)</b> | <b>Qatar (n= 61)</b> |
|-------------------------------------------------------------------------------------|---------------------------|--------------------------|------------------------------|---------------------------|-----------------------|------------------------|----------------------|
| <b>Gender No. (%)</b>                                                               |                           |                          |                              |                           |                       |                        |                      |
| Female                                                                              | 1,752 (67.5)              | 741 (71.0)               | 323 (62.8)                   | 388 (90.4)                | 124 (29.8)            | 115 (85.8)             | 61 (100)             |
| <b>Year of study No. (%)</b>                                                        |                           |                          |                              |                           |                       |                        |                      |
| First year                                                                          | 511 (19.7)                | 74 (7.1)                 | 9 (1.8)                      | 255 (59.4)                | 165 (39.7)            | 0 (0.0)                | 8 (13.1)             |
| Second year                                                                         | 407 (15.7)                | 148 (14.2)               | 21 (4.1)                     | 78 (18.2)                 | 108 (26.0)            | 32 (23.9)              | 20 (32.8)            |
| Third year                                                                          | 546 (21.0)                | 243 (23.3)               | 110 (21.4)                   | 60 (14.0)                 | 57 (13.7)             | 67 (50.0)              | 9 (14.8)             |
| Fourth year                                                                         | 679 (26.2)                | 319 (30.6)               | 232 (45.1)                   | 29 (6.8)                  | 64 (15.4)             | 22 (16.4)              | 13 (21.3)            |
| Fifth year                                                                          | 452 (17.4)                | 260 (24.9)               | 142 (27.6)                   | 7 (1.6)                   | 22 (5.3)              | 13 (9.7)               | 11 (18.0)            |
| <b>Prior healthcare experience No. (%)</b>                                          |                           |                          |                              |                           |                       |                        |                      |
| Yes                                                                                 | 990 (38.2)                | 448 (42.9)               | 281 (54.7)                   | 39 (9.1)                  | 141 (33.9)            | 49 (36.6)              | 32 (52.5)            |
| <b>Ever been involved in or witnessed harm to patients while practicing No. (%)</b> |                           |                          |                              |                           |                       |                        |                      |
| Yes                                                                                 | 712 (27.4)                | 249 (23.9)               | 230 (44.7)                   | 82 (19.1)                 | 110 (26.4)            | 28 (20.9)              | 13 (21.3)            |

**Table 2** Pharmacy students mean attitude towards patient safety scores in individual subscales and total scale scores stratified by country (n = 2,595).

|                                                                              | Overall         |       |                 |                            | Jordan          |                            | Saudi Arabia    |                            | Indonesia       |                            | India           |                            | Kuwait          |                            | Qatar           |                            |
|------------------------------------------------------------------------------|-----------------|-------|-----------------|----------------------------|-----------------|----------------------------|-----------------|----------------------------|-----------------|----------------------------|-----------------|----------------------------|-----------------|----------------------------|-----------------|----------------------------|
| Subscale                                                                     | Number of items | Range | Mean Score (SD) | Students score out of 100% | Mean Score (SD) | Students score out of 100% | Mean Score (SD) | Students score out of 100% | Mean Score (SD) | Students score out of 100% | Mean Score (SD) | Students score out of 100% | Mean Score (SD) | Students score out of 100% | Mean Score (SD) | Students score out of 100% |
| Being quality improvement focused                                            | 4               | 0-16  | 12.1 (3.1)      | <b>75.6</b>                | 11.7 (2.8)      | <b>73.1</b>                | 10.4 (3.4)      | <b>65.0</b>                | 13.7 (1.9)      | <b>85.6</b>                | 13.4 (1.9)      | <b>83.8</b>                | 11.5 (4.5)      | <b>71.9</b>                | 13.9 (1.6)      | <b>86.9</b>                |
| Acceptability of questioning more senior healthcare professionals' behaviour | 2               | 0-8   | 5.6 (1.7)       | <b>70.0</b>                | 5.4 (1.6)       | <b>67.5</b>                | 4.9 (1.8)       | <b>61.3</b>                | 6.3 (1.4)       | <b>78.8</b>                | 6.3 (1.3)       | <b>78.8</b>                | 5.1 (2.2)       | <b>63.8</b>                | 6.5 (1.3)       | <b>81.3</b>                |
| Attitude towards open disclosure                                             | 2               | 0-8   | 5.5 (1.7)       | <b>68.8</b>                | 5.6 (1.7)       | <b>70.0</b>                | 4.7 (1.6)       | <b>58.8</b>                | 6.0 (1.7)       | <b>75.0</b>                | 6.0 (1.5)       | <b>75.0</b>                | 5.0 (2.0)       | <b>62.5</b>                | 6.0 (1.4)       | <b>75.0</b>                |
| Value of contextual learning                                                 | 3               | 0-12  | 8.2 (2.2)       | <b>68.3</b>                | 8.1 (2.0)       | <b>67.5</b>                | 7.1 (2.4)       | <b>59.2</b>                | 9.2 (1.8)       | <b>76.7</b>                | 9.5 (1.7)       | <b>79.2</b>                | 6.6 (2.3)       | <b>55.0</b>                | 8.0 (2.1)       | <b>66.7</b>                |
| Internalising errors regardless of harm                                      | 3               | 0-12  | 5.9 (3.2)       | <b>49.2</b>                | 8.1 (2.6)       | <b>67.5</b>                | 5.0 (2.7)       | <b>41.7</b>                | 3.4 (2.0)       | <b>28.3</b>                | 5.4 (2.8)       | <b>45.0</b>                | 3.9 (3.3)       | <b>32.5</b>                | 1.9 (1.5)       | <b>15.8</b>                |
| <b>Total Scale</b>                                                           | 14              | 0-56  | 37.4 (7.0)      | <b>66.8</b>                | 38.9 (6.7)      | <b>69.5</b>                | 32.1 (7.0)      | <b>57.3</b>                | 38.6 (5.3)      | <b>68.9</b>                | 40.6 (5.5)      | <b>72.5</b>                | 32.1 (6.6)      | <b>57.3</b>                | 36.2 (3.9)      | <b>64.6</b>                |

Abbreviation: SD, Standard deviation

**Table 3** Pharmacy students' attitude towards patient safety score by students' characteristics (n = 2,595).

| Variable                                                                    | Patients' safety scores |     |          |
|-----------------------------------------------------------------------------|-------------------------|-----|----------|
|                                                                             | Mean                    | SD  | P-value  |
| <b>Country</b>                                                              |                         |     |          |
| Jordan                                                                      | 38.9                    | 6.7 | 0.000*** |
| Saudi Arabia                                                                | 32.1                    | 7.0 |          |
| Indonesia                                                                   | 38.6                    | 5.3 |          |
| India                                                                       | 40.6                    | 5.5 |          |
| Kuwait                                                                      | 32.1                    | 6.6 |          |
| Qatar                                                                       | 36.2                    | 3.9 |          |
| <b>Gender</b>                                                               |                         |     |          |
| Male                                                                        | 36.6                    | 7.8 | 0.000*** |
| Female                                                                      | 37.7                    | 6.6 |          |
| <b>Year of study</b>                                                        |                         |     |          |
| First year                                                                  | 39.3                    | 6.1 | 0.000*** |
| Second year                                                                 | 37.8                    | 6.8 |          |
| Third year                                                                  | 37.0                    | 6.9 |          |
| Fourth year                                                                 | 36.4                    | 7.7 |          |
| Fifth year                                                                  | 36.8                    | 7.1 |          |
| <b>Prior healthcare experience</b>                                          |                         |     |          |
| Yes                                                                         | 36.8                    | 7.4 | 0.001**  |
| No                                                                          | 37.7                    | 6.8 |          |
| <b>Ever been involved in or witnessed harm to patients while practicing</b> |                         |     |          |
| Yes                                                                         | 36.2                    | 7.8 | 0.001**  |
| No                                                                          | 37.8                    | 6.7 |          |

\*\*p &lt; 0.01

\*\*\*p &lt; 0.001

Abbreviation: SD, Standard deviation

**Table 4** Multiple regression analysis predicting students' attitude towards patients' safety.

| Variable         | Model <sup>a</sup> |       |          |
|------------------|--------------------|-------|----------|
|                  | B                  | SE    | β        |
| Demographic data |                    |       |          |
| Females          | 0.96               | 0.292 | 0.06**   |
| Year of study    |                    |       |          |
| Second year      | -1.45              | 0.46  | -0.08**  |
| Third year       | -2.20              | 0.43  | -0.13*** |

|                                                                  |       |      |          |
|------------------------------------------------------------------|-------|------|----------|
| <b>Fourth year</b>                                               | -2.76 | 0.42 | -0.17*** |
| <b>Fifth year</b>                                                | -2.41 | 0.42 | -0.13*** |
| Having prior experience in healthcare                            |       |      |          |
| <b>Yes</b>                                                       | 0.21  | 0.33 | 0.01     |
| Being involved in or witnessed harm to patients while practicing |       |      |          |
| <b>Yes</b>                                                       | -1.17 | 0.33 | -0.07*** |
| Constant                                                         |       |      |          |
| Adjusted R <sup>2</sup>                                          |       |      | 0.030    |
| P-value                                                          |       |      | 0.000    |

\*p < 0.05, \*\*p < 0.01, \*\*\*p < 0.001

a: includes gender, year of study, having prior experience in healthcare, and being involved in or witnessed harm to patients while practicing.

B: the average change in the dependent variable associated with a 1 unit change in the independent variable, statistically controlling for the other independent variables; SE: it is the standard deviation of its sampling distribution or an estimate of that standard deviation;

β: a statistical measure that compares the strength of the effect of each individual independent variable to the dependent variable

1  
2  
3  
4  
5  
6  
7  
8  
9  
10  
11  
12  
13  
14  
15  
16  
17  
18  
19  
20  
21  
22  
23  
24  
25  
26  
27  
28  
29  
30  
31  
32  
33  
34  
35  
36  
37  
38  
39  
40  
41  
42  
43  
44  
45  
46

For peer review only

**STROBE 2007 (v4) Statement—Checklist of items that should be included in reports of *cross-sectional studies***

| Section/Topic                | Item # | Recommendation                                                                                                                                                                       | Reported on page # |
|------------------------------|--------|--------------------------------------------------------------------------------------------------------------------------------------------------------------------------------------|--------------------|
| <b>Title and abstract</b>    | 1      | (a) Indicate the study's design with a commonly used term in the title or the abstract                                                                                               | 1 and 2            |
|                              |        | (b) Provide in the abstract an informative and balanced summary of what was done and what was found                                                                                  | 2                  |
| <b>Introduction</b>          |        |                                                                                                                                                                                      |                    |
| Background/rationale         | 2      | Explain the scientific background and rationale for the investigation being reported                                                                                                 | 4 and 5            |
| Objectives                   | 3      | State specific objectives, including any prespecified hypotheses                                                                                                                     | 5                  |
| <b>Methods</b>               |        |                                                                                                                                                                                      |                    |
| Study design                 | 4      | Present key elements of study design early in the paper                                                                                                                              | 5                  |
| Setting                      | 5      | Describe the setting, locations, and relevant dates, including periods of recruitment, exposure, follow-up, and data collection                                                      | 5 and 6            |
| Participants                 | 6      | (a) Give the eligibility criteria, and the sources and methods of selection of participants                                                                                          | 5 and 6            |
| Variables                    | 7      | Clearly define all outcomes, exposures, predictors, potential confounders, and effect modifiers. Give diagnostic criteria, if applicable                                             | Not applicable     |
| Data sources/<br>measurement | 8*     | For each variable of interest, give sources of data and details of methods of assessment (measurement). Describe comparability of assessment methods if there is more than one group | 5, 6 and 7         |
| Bias                         | 9      | Describe any efforts to address potential sources of bias                                                                                                                            | Not applicable     |
| Study size                   | 10     | Explain how the study size was arrived at                                                                                                                                            | 5 and 6            |
| Quantitative variables       | 11     | Explain how quantitative variables were handled in the analyses. If applicable, describe which groupings were chosen and why                                                         | 7                  |
| Statistical methods          | 12     | (a) Describe all statistical methods, including those used to control for confounding                                                                                                | 7                  |
|                              |        | (b) Describe any methods used to examine subgroups and interactions                                                                                                                  | 7                  |
|                              |        | (c) Explain how missing data were addressed                                                                                                                                          | Not applicable     |
|                              |        | (d) If applicable, describe analytical methods taking account of sampling strategy                                                                                                   | Not applicable     |
|                              |        | (e) Describe any sensitivity analyses                                                                                                                                                | Not applicable     |
| <b>Results</b>               |        |                                                                                                                                                                                      |                    |

|                          |     |                                                                                                                                                                                                              |                |
|--------------------------|-----|--------------------------------------------------------------------------------------------------------------------------------------------------------------------------------------------------------------|----------------|
| Participants             | 13* | (a) Report numbers of individuals at each stage of study—eg numbers potentially eligible, examined for eligibility, confirmed eligible, included in the study, completing follow-up, and analysed            | 8              |
|                          |     | (b) Give reasons for non-participation at each stage                                                                                                                                                         | Not applicable |
|                          |     | (c) Consider use of a flow diagram                                                                                                                                                                           | Not applicable |
| Descriptive data         | 14* | (a) Give characteristics of study participants (eg demographic, clinical, social) and information on exposures and potential confounders                                                                     | 8 and 9        |
|                          |     | (b) Indicate number of participants with missing data for each variable of interest                                                                                                                          | Not applicable |
| Outcome data             | 15* | Report numbers of outcome events or summary measures                                                                                                                                                         | 8 -12          |
| Main results             | 16  | (a) Give unadjusted estimates and, if applicable, confounder-adjusted estimates and their precision (eg, 95% confidence interval). Make clear which confounders were adjusted for and why they were included | Not applicable |
|                          |     | (b) Report category boundaries when continuous variables were categorized                                                                                                                                    | Not applicable |
|                          |     | (c) If relevant, consider translating estimates of relative risk into absolute risk for a meaningful time period                                                                                             | Not applicable |
| Other analyses           | 17  | Report other analyses done—eg analyses of subgroups and interactions, and sensitivity analyses                                                                                                               | Not applicable |
| <b>Discussion</b>        |     |                                                                                                                                                                                                              |                |
| Key results              | 18  | Summarise key results with reference to study objectives                                                                                                                                                     | 12             |
| Limitations              | 19  | Discuss limitations of the study, taking into account sources of potential bias or imprecision. Discuss both direction and magnitude of any potential bias                                                   | 14             |
| Interpretation           | 20  | Give a cautious overall interpretation of results considering objectives, limitations, multiplicity of analyses, results from similar studies, and other relevant evidence                                   | 12-14          |
| Generalisability         | 21  | Discuss the generalisability (external validity) of the study results                                                                                                                                        | 14             |
| <b>Other information</b> |     |                                                                                                                                                                                                              |                |
| Funding                  | 22  | Give the source of funding and the role of the funders for the present study and, if applicable, for the original study on which the present article is based                                                | 17             |

\*Give information separately for cases and controls in case-control studies and, if applicable, for exposed and unexposed groups in cohort and cross-sectional studies.

**Note:** An Explanation and Elaboration article discusses each checklist item and gives methodological background and published examples of transparent reporting. The STROBE checklist is best used in conjunction with this article (freely available on the Web sites of PLoS Medicine at <http://www.plosmedicine.org/>, Annals of Internal Medicine at <http://www.annals.org/>, and Epidemiology at <http://www.epidem.com/>). Information on the STROBE Initiative is available at [www.strobe-statement.org](http://www.strobe-statement.org).



# BMJ Open

## Attitudes of pharmacy students towards patient safety: a cross-sectional study from six developing countries

|                                 |                                                                                                                                                                                                                                                                                                                                                                                                                                                                                                                                                                                                                                                                                                                                                                                                                                                                                                                                                                                                                                                                                                                                                                                                                                                                                                                                                                                                                                                            |
|---------------------------------|------------------------------------------------------------------------------------------------------------------------------------------------------------------------------------------------------------------------------------------------------------------------------------------------------------------------------------------------------------------------------------------------------------------------------------------------------------------------------------------------------------------------------------------------------------------------------------------------------------------------------------------------------------------------------------------------------------------------------------------------------------------------------------------------------------------------------------------------------------------------------------------------------------------------------------------------------------------------------------------------------------------------------------------------------------------------------------------------------------------------------------------------------------------------------------------------------------------------------------------------------------------------------------------------------------------------------------------------------------------------------------------------------------------------------------------------------------|
| Journal:                        | <i>BMJ Open</i>                                                                                                                                                                                                                                                                                                                                                                                                                                                                                                                                                                                                                                                                                                                                                                                                                                                                                                                                                                                                                                                                                                                                                                                                                                                                                                                                                                                                                                            |
| Manuscript ID                   | bmjopen-2020-039459.R2                                                                                                                                                                                                                                                                                                                                                                                                                                                                                                                                                                                                                                                                                                                                                                                                                                                                                                                                                                                                                                                                                                                                                                                                                                                                                                                                                                                                                                     |
| Article Type:                   | Original research                                                                                                                                                                                                                                                                                                                                                                                                                                                                                                                                                                                                                                                                                                                                                                                                                                                                                                                                                                                                                                                                                                                                                                                                                                                                                                                                                                                                                                          |
| Date Submitted by the Author:   | 17-Oct-2020                                                                                                                                                                                                                                                                                                                                                                                                                                                                                                                                                                                                                                                                                                                                                                                                                                                                                                                                                                                                                                                                                                                                                                                                                                                                                                                                                                                                                                                |
| Complete List of Authors:       | Naser, Abdallah; Isra University, Department of Applied Pharmaceutical Sciences and Clinical Pharmacy<br>Alsairafi, Zahra; Kuwait University, Department of Pharmacy Practice, Faculty of Pharmacy<br>Awaisu, Ahmed; Qatar University, Department of Clinical Pharmacy and Practice, College of Pharmacy, QU Health<br>Alwafi, Hassan; Umm Al-Qura University, Department of Pharmacology and Toxicology<br>Awwad, Oriana ; The University of Jordan, Department of Biopharmaceutics and Clinical Pharmacy<br>Dahmash, Eman; Isra University, Department of Applied Pharmaceutical Sciences and Clinical Pharmacy<br>Hussain, Salman; Jamia Hamdard, Department of Pharmaceutical Medicine, School of Pharmaceutical Education and Research<br>Alyami, Hamad; Najran University, Department of Pharmaceutics, College of Pharmacy<br>Alsharif , Alaa ; UCL School of Pharmacy, Research Department of Practice and Policy, UCL School of Pharmacy; Princess Nora bint Abdul Rahman University, Department of Pharmacy Practice, Faculty of Pharmacy<br>Singh, Avinash ; Jamia Hamdard, Department of Pharmaceutical Medicine, School of Pharmaceutical Education and Research<br>Jeragh-Alhaddad, Fatima ; Kuwait University, Department of Pharmacy Practice, Faculty of Pharmacy<br>Kautsar, Angga ; Universitas Padjadjaran, Faculty of Pharmacy<br>AbuAlhommos, Amal ; King Faisal University, Pharmacy Practice Department, Clinical Pharmacy College |
| <b>Primary Subject Heading</b>: | Medical education and training                                                                                                                                                                                                                                                                                                                                                                                                                                                                                                                                                                                                                                                                                                                                                                                                                                                                                                                                                                                                                                                                                                                                                                                                                                                                                                                                                                                                                             |
| Secondary Subject Heading:      | Public health, Health services research, Patient-centred medicine                                                                                                                                                                                                                                                                                                                                                                                                                                                                                                                                                                                                                                                                                                                                                                                                                                                                                                                                                                                                                                                                                                                                                                                                                                                                                                                                                                                          |
| Keywords:                       | MEDICAL EDUCATION & TRAINING, Health & safety < HEALTH SERVICES ADMINISTRATION & MANAGEMENT, Quality in health care < HEALTH SERVICES ADMINISTRATION & MANAGEMENT                                                                                                                                                                                                                                                                                                                                                                                                                                                                                                                                                                                                                                                                                                                                                                                                                                                                                                                                                                                                                                                                                                                                                                                                                                                                                          |
|                                 |                                                                                                                                                                                                                                                                                                                                                                                                                                                                                                                                                                                                                                                                                                                                                                                                                                                                                                                                                                                                                                                                                                                                                                                                                                                                                                                                                                                                                                                            |

1  
2  
3  
4  
5  
6  
7  
8  
9  
10  
11  
12  
13  
14  
15  
16  
17  
18  
19  
20  
21  
22  
23  
24  
25  
26  
27  
28  
29  
30  
31  
32  
33  
34  
35  
36  
37  
38  
39  
40  
41  
42  
43  
44  
45  
46  
47  
48  
49  
50  
51  
52  
53  
54  
55  
56  
57  
58  
59  
60





I, the Submitting Author has the right to grant and does grant on behalf of all authors of the Work (as defined in the below author licence), an exclusive licence and/or a non-exclusive licence for contributions from authors who are: i) UK Crown employees; ii) where BMJ has agreed a CC-BY licence shall apply, and/or iii) in accordance with the terms applicable for US Federal Government officers or employees acting as part of their official duties; on a worldwide, perpetual, irrevocable, royalty-free basis to BMJ Publishing Group Ltd ("BMJ") its licensees and where the relevant Journal is co-owned by BMJ to the co-owners of the Journal, to publish the Work in this journal and any other BMJ products and to exploit all rights, as set out in our [licence](#).

The Submitting Author accepts and understands that any supply made under these terms is made by BMJ to the Submitting Author unless you are acting as an employee on behalf of your employer or a postgraduate student of an affiliated institution which is paying any applicable article publishing charge ("APC") for Open Access articles. Where the Submitting Author wishes to make the Work available on an Open Access basis (and intends to pay the relevant APC), the terms of reuse of such Open Access shall be governed by a Creative Commons licence – details of these licences and which [Creative Commons](#) licence will apply to this Work are set out in our licence referred to above.

Other than as permitted in any relevant BMJ Author's Self Archiving Policies, I confirm this Work has not been accepted for publication elsewhere, is not being considered for publication elsewhere and does not duplicate material already published. I confirm all authors consent to publication of this Work and authorise the granting of this licence.

1  
2  
3 1 **Article title:** Attitudes of pharmacy students towards patient safety: a cross-sectional study from six developing  
4  
5 2 countries

6  
7 3 **Short-running title:** Attitudes of pharmacy students towards patient safety

8  
9  
10 4 **Authors' information:**

11  
12  
13 5 Abdallah Y Naser<sup>1</sup>, Zahra Khalil Alsairafi<sup>2</sup>, Ahmed Awaisu<sup>3</sup>, Hassan Alwafi<sup>4</sup>, Oriana Awwad<sup>5</sup>, Eman Zmaily  
14 6 Dahmash<sup>1</sup>, Salman Hussain<sup>6</sup>, Hamad S. Alyami<sup>7</sup>, Alaa Alsharif<sup>8,9</sup>, Avinash Kumar Singh<sup>6</sup>, Fatima B Jeragh-  
15 7 Alhaddad<sup>2</sup>, Angga Prawira Kautsar<sup>10</sup>, Amal Khaleel AbuAlhommos<sup>11</sup>

16  
17  
18  
19 8 **Corresponding Author:** Dr. Abdallah Y Naser, Assistant Professor in Clinical Pharmacy and  
20 9 Pharmacoeconomics, Department of Applied Pharmaceutical Sciences and Clinical Pharmacy, Faculty of  
21 10 Pharmacy, Isra University, Amman, Jordan (abdallah.naser@iu.edu.jo), 00962795285555

1  
2  
3 36 **ABSTRACT**  
4

5 37 **Objective:** To evaluate the attitudes of undergraduate pharmacy students towards patient safety in six developing  
6  
7 38 countries.

8  
9 39 **Design:** A cross-sectional study.

10  
11 40 **Setting:** Participants were enrolled from the participating universities in six countries.

12  
13 41 **Participants:** Undergraduate pharmacy students from the participating universities in six developing countries  
14  
15 42 (Jordan, Saudi Arabia, Kuwait, Qatar, India and Indonesia) were invited to participate in the study between  
16  
17 43 October 2018 and September 2019.

18  
19 44 **Primary outcome:** Attitudes towards patient safety was measured using 14-item questionnaire that contained  
20  
21 45 five subscales: being quality-improvement focused, internalising errors regardless of harm, value of contextual  
22  
23 46 learning, acceptability of questioning more senior healthcare professionals' behaviour, and attitude towards open  
24  
25 47 disclosure. Multiple-linear regression analysis was used to identify predictors of positive attitudes towards patient  
26  
27 48 safety.

28  
29 49 **Results:** A total of 2,595 students participated in this study (1,044 from Jordan, 514 from Saudi Arabia, 134 from  
30  
31 50 Kuwait, 61 from Qatar, 416 from India and 429 from Indonesia). Overall, the pharmacy students reported a  
32  
33 51 positive attitude towards patient safety with a mean score of 37.4 (SD= 7.0) out of 56 (66.8%). The "being quality-  
34  
35 52 improvement focused" subscale had the highest score, 75.6%. The subscale with the lowest score was  
36  
37 53 "internalising errors regardless of harm", 49.2%. Female students had significantly better attitudes towards patient  
38  
39 54 safety scores compared to male students ( $p=0.001$ ). Being at a higher level of study and involvement in or  
40  
41 55 witnessing harm to patients while practising were important predictors of negative attitudes towards patient safety  
42  
43 56 ( $p<0.001$ ).

44  
45 57 **Conclusion:** Patient safety content should be covered comprehensively in pharmacy curricula and reinforced in  
46  
47 58 each year of study. This should be more focused on students in their final year of study and who have started their  
48  
49 59 training. This will ensure that the next generation of pharmacists are equipped with the requisite knowledge, core  
50  
51 60 competencies and attitudes to ensure optimal patient safety when they practice.

51 61 **Keywords:** Attitude; Patient; Pharmacy; Safety; Students.  
52  
53 62  
54  
55 63  
56  
57 64  
58  
59 65  
60

### 66 **Strengths and limitations of this study**

- 67 • This is the first study comprising participants from multiple countries to investigate the attitudes of  
68 undergraduate pharmacy students towards patient safety in the Middle East region.
- 69 • We were not able to estimate the response rate for our study, which might have led to nonresponse bias.
- 70 • The study sample was mainly dominated by students from two countries (Jordan and Saudi Arabia),  
71 while there was a small number of participants from Qatar and Kuwait.

For peer review only

## 96 INTRODUCTION

97 Patient safety is one of the main concerns of healthcare systems during the provision of healthcare services and is  
98 increasingly being used as a measure of healthcare quality. The World Health Organization (WHO) has stressed  
99 the importance of reducing healthcare errors and establishing action plans to reduce patient harm and increase  
100 patient safety<sup>1</sup>. Medical errors are associated with high probability of patients harm and high mortality rate which  
101 raised the need for strategies that are evidence-based to enhance patient safety<sup>2</sup>. Research results revealed that  
102 around 10.0% of patients admitted to hospital within developed countries have a chance of being harmed, and up  
103 to 18.0% of hospital admissions experienced adverse events. Besides, there is a growing concern pertinent to the  
104 level of harm among patients in developing countries that could be attributed to the lack of accountability<sup>3-5</sup>.  
105 One of the best strategies to promote safer attitudes towards patient safety is education<sup>6,7</sup>. Patient safety education  
106 for undergraduate healthcare students has been considered a crucial element in minimising patient harm and  
107 developing a positive patient safety culture<sup>8</sup>. Several key international organisations have made recommendations  
108 to reshape healthcare professional education curricula to guarantee that they foster students' attitudes toward  
109 patient safety through enhancing their knowledge, skills and attitudes<sup>9-14</sup>. In recent years, pharmacy degree  
110 programmes have included content related to patient safety through curriculum guides<sup>5</sup>, including the WHO's  
111 Patient Safety Curriculum Guide for Medical Schools<sup>15</sup> and their Multiprofessional Patient Safety Curriculum  
112 Guide<sup>16-19</sup>. Pharmacy students, in developing countries, gain some practical experience in healthcare settings at  
113 an earlier stage of their studies, either through experiential education placements or simulation-based programs  
114<sup>20</sup>. However, unlike other healthcare professions, pharmacists' training is not well structured and does not mandate  
115 close monitoring of students during their training by preceptors. Although patient-centred care and patient safety  
116 might have been embedded through the curriculum, it has been mostly informal and theoretical<sup>4,5,21</sup>.  
117 Unfortunately, there is no recent studies that described the curricula in the Middle Eastern countries, However, a  
118 study in 2008, in Jordan reported that curricula at various pharmacy schools covers only 20% of allocated credit  
119 hours in pharmaceutical care which covers elements of patient safety. A study with sample of government and  
120 private universities in Jordan concluded that none of the evaluated universities had adopted a structured patient-  
121 oriented training for students<sup>22</sup>. In Qatar, the pharmacy practice focuses mainly on medication dispensing, and  
122 patient care that includes patient safety is still in its infancy<sup>23</sup>. Similar situations are present in Kuwait and Saudi  
123 Arabia where pharmaceutical care is only a focused in Pharm D program not the BSc Pharmacy program<sup>24</sup>. The  
124 situation in India is not widely different, there is no standard curriculum and it varies across universities. Most  
125 pharmacy school's education is away from practice sites and compulsory training is not required<sup>25</sup>. In Indonesia,

1  
2  
3 126 recent study in 2020 revealed that the provision of the pharmaceutical care that covers patient centered care and  
4  
5 127 safety by community pharmacists in Malaysia is minimal <sup>26</sup>.

6  
7 128 In developing countries, there are cultural concerns, where pharmacy students are intimidated by other healthcare  
8  
9 129 professionals particularly, physicians, when they are in the clinical practice setting which will hamper patient  
10  
11 130 safety. The 'hierarchical difference in medical knowledge' will make young pharmacists' reluctance to question  
12  
13 131 decisions made by physicians <sup>5,27</sup>. Therefore, improving patient safety in developing countries requires changing  
14  
15 132 attitude particularly in shifting the blame culture in healthcare settings.

16  
17 133 Efforts to foster patient safety in developing countries must be augmented and education systems during  
18  
19 134 undergraduate level must provide knowledge to improve patient safety <sup>27</sup>.

20  
21 135 Despite the increasing effort to enhance patient safety through improving healthcare professional curricula, this  
22  
23 136 improvement is considered challenging, and progress is very slow <sup>5,12,13,28-33</sup>. Developing positive attitudes among  
24  
25 137 university students is important as it is positively related to their achievement <sup>34</sup>. The accomplishment of  
26  
27 138 educational goals related to delivering safe and quality healthcare services requires students to have positive  
28  
29 139 attitudes towards patient safety <sup>34,35</sup>. Since attitude can substantially impact an individual's behaviour and practice  
30  
31 140 <sup>36</sup>, it is crucial that pharmacy students' attitudes towards patient safety are understood and evaluated particularly  
32  
33 141 in developing countries.

34  
35 142 Previous studies have explored the attitudes and values of healthcare students towards patient safety in different  
36  
37 143 countries, using different instruments <sup>18,19,37-44</sup>. The most widely-used validated tool is the patient safety/medical  
38  
39 144 fallibility survey, which was originally developed by Madigosky et al. for use among medical students <sup>37</sup>. This  
40  
41 145 tool was validated to assess the patient safety attitudes of pharmacy students by Walpola et al. <sup>45</sup>. However, there  
42  
43 146 are a limited number of studies that have focused on attitudes of undergraduate pharmacy students towards patient  
44  
45 147 safety, especially in developing countries. Therefore, the aim of this study was to evaluate the attitudes of  
46  
47 148 undergraduate pharmacy students towards patient safety in six developing countries.

## 47 149 **METHODS**

### 48 49 150 **Study design**

50  
51 151 A quantitative cross-sectional survey using a self-administered questionnaire was conducted to explore patient  
52  
53 152 safety attitudes and values among pharmacy students in six developing countries (Jordan, Saudi Arabia, Kuwait,  
54  
55 153 Qatar, India and Indonesia). To achieve the study aim, a self-administered questionnaire approach was adopted.  
56  
57 154 This approach has the advantage of being easily administered to a large number of participants within a short time  
58  
59 155 period, eliminating interviewer bias <sup>46</sup>. In addition, this technique can easily explain students' behaviour <sup>47</sup>.



### 156 **Sample size**

157 Based on the original study conducted by Walpola et al.<sup>45</sup>, a sample size of 200 students from each country was  
158 considered adequately representative. The original study estimated the appropriate sample size based on  
159 Boomsma's method of estimating a minimum sample size to conduct a confirmatory factor analysis based on the  
160 number of items to number of factors ratio of the model<sup>48</sup>.

### 161 **Sampling strategy**

162 The study population included undergraduate pharmacy students across all professional years of study. A  
163 convenience sampling technique was used to recruit eligible participants as it was not feasible to determine a  
164 sampling frame in each of the six countries. This sampling technique is a type of non-probability sampling method,  
165 in which participants from the target population who met the inclusion criteria of the study were easily accessible  
166 due to geographical proximity, availability at a given time, or were willing to take part in the study<sup>49</sup>. Student  
167 recruitment was conducted by researchers (AN, OA) in Jordan, (A. Alsharif) in Saudi Arabia, (ZA) in Kuwait,  
168 (A. Awaisu) in Qatar, (SH) in India and (AK) in Indonesia. The questionnaire was administered either as a hard-  
169 copy or electronically to eligible participants in a consistent manner to reduce the risk of assessment bias. All the  
170 undergraduate pharmacy students in the participating universities were approached and invited to take part in the  
171 study. For students who agreed to participate, the questionnaire was administered either as a hard copy or  
172 electronically after the study aim and objectives had been explained.

### 173 **Survey instrument**

174 A previously validated questionnaire<sup>45</sup> was used in this study to explore the attitudes of undergraduate pharmacy  
175 students towards patient safety. This questionnaire was originally developed and validated by Walpola and  
176 colleagues, who validated an adaptation of Madigosky et al's questionnaire (the Patient Safety/Medical Fallibility  
177 Curriculum Survey)<sup>37</sup>, to evaluate attitudes and values of pharmacy students towards patient safety. Walpola et  
178 al.'s 14-item questionnaire comprised five subscales: (1) quality-improvement focused (four questions), (2)  
179 internalising errors regardless of harm (three questions), (3) value of contextual learning (three questions), (4)  
180 acceptability of questioning more senior healthcare professionals' behaviour (two questions), and (5) attitude  
181 towards open disclosure (two questions). The study questionnaire asked undergraduate pharmacy students about  
182 the degree of applicability of each item to them using a 5-point Likert scale. Response options ranged from 0 to  
183 4, where 0 meant "strongly disagree" and 4 meant "strongly agree". Three items (items numbered 5, 6, and 7)  
184 were negatively worded and, thus, were reversely scored during the analysis, where 0 meant "strongly agree" and  
185 4 meant "strongly disagree". The total possible score for the questionnaire ranged between 0 and 56 and could be

1  
2  
3 186 interpreted based on the mid-point of the highest possible score of the scale (equal to 28): the higher the score,  
4  
5 187 the better the attitude towards patient safety. Besides, the following data were collected: participant's gender, year  
6  
7 188 of study, prior practical experience in healthcare settings- if applicable, and involvement in an incident that  
8  
9 189 resulted in harm or potential harm as a result of receiving healthcare.

10  
11 190 The use of a pre-existing questionnaire has the advantage of using a validated and tested instrument, which  
12  
13 191 increases the reliability of measurement<sup>50</sup>. In addition, the use of an existing questionnaire allows for comparison  
14  
15 192 with different populations<sup>51</sup>. The mean score  $\pm$  SD for each item was calculated based on the student responses  
16  
17 193 using the 5-point Likert scale, which ranged between 0 and 4. In addition, the total mean score for each subscale  
18  
19 194 was calculated to allow comparison between different subscales.

### 20 195 **Validity and reliability of the survey instrument**

21  
22 196 Walpola's questionnaire was examined for its psychometric properties in 446 students<sup>45</sup>. The face and content  
23  
24 197 validity of the questionnaire were tested. In addition, exploratory factor analysis was conducted to test the  
25  
26 198 construct validity and the internal consistency of the questionnaire was examined. In addition, the original  
27  
28 199 investigators conducted focus groups among three populations: initially among five pharmacy academics, five  
29  
30 200 practising pharmacists and seven pharmacy student representatives to assess the face validity of the survey  
31  
32 201 instrument. Besides this, we examined Cronbach's alpha measures for the five factors in the questionnaire, which  
33  
34 202 ranged between 0.56 and 0.78. The overall Cronbach's alpha measure was 0.72 (Cronbach's alpha value for each  
35  
36 203 subscale is included in the supplements). This identified the questionnaire as having acceptable stability.

### 37 204 **Pre-testing of the questionnaire**

38  
39 205 A pilot study using the original questionnaire was conducted on 45 pharmacy students (from different Arab  
40  
41 206 nationalities) in Jordan, who met the inclusion criteria for the study. Students were asked about the clarity and  
42  
43 207 comprehensibility of the questionnaire, and if any of the questions were difficult to understand. Students  
44  
45 208 confirmed that the questionnaire was considered easy to understand and to complete.

### 46 47 209 **Data collection procedure**

48  
49 210 In Jordan, we used hard copies of the questionnaire, and the recruitment of participants was conducted in two  
50  
51 211 universities (one private and one government). An electronic version of the questionnaire was used for the students  
52  
53 212 recruited in the other countries. In Saudi Arabia, the survey was distributed in three government universities. In  
54  
55 213 Indonesia, student recruitment was conducted in two government universities, while in India it was conducted in  
56  
57 214 five universities. In Kuwait and Qatar, the study was conducted in one government university in each country,  
58  
59 215 these being the only available ones that offer an undergraduate pharmacy degree program.

## 216 **Patient and public involvement**

217 It was not appropriate or possible to involve patients or the public in the design, or conduct, or reporting, or  
218 dissemination plans of our research.

## 219 **Statistical analysis**

220 Data were analysed using SPSS software, version 25 (IBM Corp, Armonk, NY, USA). Continuous variables were  
221 reported as mean ( $\pm$  standard deviation [SD]), while categorical variables were reported as frequencies and  
222 percentages. The Kolmogorov–Smirnov and Shapiro Wilk tests were used to check the normality of the data.  
223 Students' scores were interpreted as a continuous scale based on the scale midpoint, where scores above the  
224 midpoint represented more positive attitudes towards patient safety for that factor. The one-way ANOVA test and  
225 Pearson's correlation coefficient were used to compare the mean scores between different demographic groups  
226 and to analyse the correlation between continuous independent variables and students' scores, respectively.  
227 Tukey's HSD post-hoc test was conducted to identify the source of significant variation within each group.  
228 Additionally, significant predictors of positive attitudes towards patients' safety were determined using multiple  
229 linear regression analysis. A confidence interval of 95% ( $p < 0.05$ ) was applied to represent the statistical  
230 significance of the results, and the level of significance was predetermined as 5%.

## 231 **RESULTS**

### 232 **Students' demographic characteristics**

233 A total of 2,595 undergraduate pharmacy students participated in the study (Jordan = 1,044, Saudi Arabia = 514,  
234 Indonesia = 429, India = 416, Kuwait = 134 and Qatar = 61). About 67.0% ( $n = 1,752$ ) of the students were female.  
235 The majority of the respondents were recruited from Jordan ( $n = 1,044$ ; 39.9%), followed by Saudi Arabia ( $n =$   
236 514; 19.7%). An approximately similar percentage of participants were recruited from Indonesia ( $n = 429$ ; 16.5%)  
237 and India ( $n = 416$ ; 16.0%). The lowest percentages of participants came from Kuwait and Qatar, with only 5.2%  
238 ( $n = 134$ ) and 2.4% ( $n = 61$ ) being recruited from these two countries, respectively. This was expected due to the  
239 small population size and, thus, the small number of pharmacy students (Kuwait and Qatar only have one faculty  
240 of pharmacy each). The majority of the students were in their thirds and fourth year of study with 21.0% ( $n = 546$ )  
241 and 26.2% ( $n = 679$ ), respectively. Only 38.2% ( $n = 990$ ) of the participants reported that they had had prior or  
242 were undergoing current practical experience in a practice setting, with only 27.4% ( $n = 712$ ) of the participants  
243 have been involved in or have witnessed harm to patients while practicing. **Table 1** below summarises the  
244 demographic characteristics of the study participants from each country.

245 **Table 1** Pharmacy students' characteristics from each country.

| <b>Demographics</b>                                                                 | <b>Overall (n= 2,595)</b> | <b>Jordan (n= 1,044)</b> | <b>Saudi Arabia (n= 514)</b> | <b>Indonesia (n= 429)</b> | <b>India (n= 416)</b> | <b>Kuwait (n= 134)</b> | <b>Qatar (n= 61)</b> |
|-------------------------------------------------------------------------------------|---------------------------|--------------------------|------------------------------|---------------------------|-----------------------|------------------------|----------------------|
| <b>Gender No. (%)</b>                                                               |                           |                          |                              |                           |                       |                        |                      |
| Female                                                                              | 1,752 (67.5)              | 741 (71.0)               | 323 (62.8)                   | 388 (90.4)                | 124 (29.8)            | 115 (85.8)             | 61 (100)             |
| <b>Year of study No. (%)</b>                                                        |                           |                          |                              |                           |                       |                        |                      |
| First year                                                                          | 511 (19.7)                | 74 (7.1)                 | 9 (1.8)                      | 255 (59.4)                | 165 (39.7)            | 0 (0.0)                | 8 (13.1)             |
| Second year                                                                         | 407 (15.7)                | 148 (14.2)               | 21 (4.1)                     | 78 (18.2)                 | 108 (26.0)            | 32 (23.9)              | 20 (32.8)            |
| Third year                                                                          | 546 (21.0)                | 243 (23.3)               | 110 (21.4)                   | 60 (14.0)                 | 57 (13.7)             | 67 (50.0)              | 9 (14.8)             |
| Fourth year                                                                         | 679 (26.2)                | 319 (30.6)               | 232 (45.1)                   | 29 (6.8)                  | 64 (15.4)             | 22 (16.4)              | 13 (21.3)            |
| Fifth year                                                                          | 452 (17.4)                | 260 (24.9)               | 142 (27.6)                   | 7 (1.6)                   | 22 (5.3)              | 13 (9.7)               | 11 (18.0)            |
| <b>Prior healthcare experience No. (%)</b>                                          |                           |                          |                              |                           |                       |                        |                      |
| Yes                                                                                 | 990 (38.2)                | 448 (42.9)               | 281 (54.7)                   | 39 (9.1)                  | 141 (33.9)            | 49 (36.6)              | 32 (52.5)            |
| <b>Ever been involved in or witnessed harm to patients while practicing No. (%)</b> |                           |                          |                              |                           |                       |                        |                      |
| Yes                                                                                 | 712 (27.4)                | 249 (23.9)               | 230 (44.7)                   | 82 (19.1)                 | 110 (26.4)            | 28 (20.9)              | 13 (21.3)            |

### 247 **Pharmacy students' attitude towards patient safety**

248 The mean score of the participants for the total scale was 37.4 [SD= 7.0] out of 56 (the highest possible score),  
249 66.8%. The first subscale measured students' attitude in terms of "being quality-improvement focused". The  
250 participants' score was the highest for this scale, 75.6%. The lowest score was for the "internalising errors  
251 regardless of harm" subscale, 49.2%.

252 The highest mean score for the total scale was for India (40.6 (SD= 5.5), 72.5%). India had the highest subscale  
253 score for the subscale "value of contextual learning" (9.5 (SD= 1.7), 79.2%). Qatar had the highest subscale score  
254 for two subscales which are "being quality improvement focused" (13.9 (SD= 1.6), 86.9%) and "acceptability of  
255 questioning more senior healthcare professionals' behaviour" (6.5 (SD= 1.3), 81.3%). The score of the subscale  
256 "attitude towards open disclosure" was similar across students from Indonesia, India, and Qatar with a mean score  
257 that range between 6.0 (SD= 1.4) to 6.0 (SD= 1.7), 75.0%. Jordan had the highest subscale score for the subscale  
258 "internalising errors regardless of harm" (8.1 (SD= 2.6), 67.5%). **Table 2** summarizes these findings.

276 **Table 2** Pharmacy students mean attitude towards patient safety scores in individual subscales and total scale scores stratified by country (n = 2,595).

| Subscale                                                                     | Overall         |       |                 |                            | Jordan          |                            | Saudi Arabia    |                            | Indonesia       |                            | India           |                            | Kuwait          |                            | Qatar           |                            |
|------------------------------------------------------------------------------|-----------------|-------|-----------------|----------------------------|-----------------|----------------------------|-----------------|----------------------------|-----------------|----------------------------|-----------------|----------------------------|-----------------|----------------------------|-----------------|----------------------------|
|                                                                              | Number of items | Range | Mean Score (SD) | Students score out of 100% | Mean Score (SD) | Students score out of 100% | Mean Score (SD) | Students score out of 100% | Mean Score (SD) | Students score out of 100% | Mean Score (SD) | Students score out of 100% | Mean Score (SD) | Students score out of 100% | Mean Score (SD) | Students score out of 100% |
| Being quality improvement focused                                            | 4               | 0-16  | 12.1 (3.1)      | <b>75.6</b>                | 11.7 (2.8)      | <b>73.1</b>                | 10.4 (3.4)      | <b>65.0</b>                | 13.7 (1.9)      | <b>85.6</b>                | 13.4 (1.9)      | <b>83.8</b>                | 11.5 (4.5)      | <b>71.9</b>                | 13.9 (1.6)      | <b>86.9</b>                |
| Acceptability of questioning more senior healthcare professionals' behaviour | 2               | 0-8   | 5.6 (1.7)       | <b>70.0</b>                | 5.4 (1.6)       | <b>67.5</b>                | 4.9 (1.8)       | <b>61.3</b>                | 6.3 (1.4)       | <b>78.8</b>                | 6.3 (1.3)       | <b>78.8</b>                | 5.1 (2.2)       | <b>63.8</b>                | 6.5 (1.3)       | <b>81.3</b>                |
| Attitude towards open disclosure                                             | 2               | 0-8   | 5.5 (1.7)       | <b>68.8</b>                | 5.6 (1.7)       | <b>70.0</b>                | 4.7 (1.6)       | <b>58.8</b>                | 6.0 (1.7)       | <b>75.0</b>                | 6.0 (1.5)       | <b>75.0</b>                | 5.0 (2.0)       | <b>62.5</b>                | 6.0 (1.4)       | <b>75.0</b>                |
| Value of contextual learning                                                 | 3               | 0-12  | 8.2 (2.2)       | <b>68.3</b>                | 8.1 (2.0)       | <b>67.5</b>                | 7.1 (2.4)       | <b>59.2</b>                | 9.2 (1.8)       | <b>76.7</b>                | 9.5 (1.7)       | <b>79.2</b>                | 6.6 (2.3)       | <b>55.0</b>                | 8.0 (2.1)       | <b>66.7</b>                |
| Internalising errors regardless of harm                                      | 3               | 0-12  | 5.9 (3.2)       | <b>49.2</b>                | 8.1 (2.6)       | <b>67.5</b>                | 5.0 (2.7)       | <b>41.7</b>                | 3.4 (2.0)       | <b>28.3</b>                | 5.4 (2.8)       | <b>45.0</b>                | 3.9 (3.3)       | <b>32.5</b>                | 1.9 (1.5)       | <b>15.8</b>                |
| <b>Total Scale</b>                                                           | 14              | 0-56  | 37.4 (7.0)      | <b>66.8</b>                | 38.9 (6.7)      | <b>69.5</b>                | 32.1 (7.0)      | <b>57.3</b>                | 38.6 (5.3)      | <b>68.9</b>                | 40.6 (5.5)      | <b>72.5</b>                | 32.1 (6.6)      | <b>57.3</b>                | 36.2 (3.9)      | <b>64.6</b>                |

277

278 Abbreviation: SD, Standard deviation

279

280

281

282

283

284

285

286

287

288 **Effect of students' characteristics on their attitude towards patients' safety**

289 **Table 3** presents the effect of the students' demographics on their attitude towards patient safety scores. Students'  
 290 scores significantly differed by country, gender, year of study, having prior experience in healthcare and being  
 291 involved in or having witnessed harm to patients while practicing ( $p < 0.01$ ). Tukey's HSD post-hoc test confirmed  
 292 that all countries contributed to the significant difference in the mean score except Indonesia, and that Saudi  
 293 Arabia, Kuwait and India had the most significant contributions in this variation. Regarding the year of study  
 294 variable, the Tukey HSD test confirmed that all years of study contributed to the significant variation between  
 295 groups.

296 **Table 3** Pharmacy students' attitude towards patient safety score by students' characteristics (n= 2,595).

| Variable                                                                    | Patients' safety scores |     |          |
|-----------------------------------------------------------------------------|-------------------------|-----|----------|
|                                                                             | Mean                    | SD  | P-value  |
| <b>Country</b>                                                              |                         |     |          |
| Jordan                                                                      | 38.9                    | 6.7 | 0.000*** |
| Saudi Arabia                                                                | 32.1                    | 7.0 |          |
| Indonesia                                                                   | 38.6                    | 5.3 |          |
| India                                                                       | 40.6                    | 5.5 |          |
| Kuwait                                                                      | 32.1                    | 6.6 |          |
| Qatar                                                                       | 36.2                    | 3.9 |          |
| <b>Gender</b>                                                               |                         |     |          |
| Male                                                                        | 36.6                    | 7.8 | 0.000*** |
| Female                                                                      | 37.7                    | 6.6 |          |
| <b>Year of study</b>                                                        |                         |     |          |
| First year                                                                  | 39.3                    | 6.1 | 0.000*** |
| Second year                                                                 | 37.8                    | 6.8 |          |
| Third year                                                                  | 37.0                    | 6.9 |          |
| Fourth year                                                                 | 36.4                    | 7.7 |          |
| Fifth year                                                                  | 36.8                    | 7.1 |          |
| <b>Prior healthcare experience</b>                                          |                         |     |          |
| Yes                                                                         | 36.8                    | 7.4 | 0.001**  |
| No                                                                          | 37.7                    | 6.8 |          |
| <b>Ever been involved in or witnessed harm to patients while practicing</b> |                         |     |          |
| Yes                                                                         | 36.2                    | 7.8 | 0.001**  |
| No                                                                          | 37.8                    | 6.7 |          |

297 \*\* $p < 0.01$ , \*\*\* $p < 0.001$ , Abbreviation: SD, Standard deviation

298 Simple linear regression analysis showed that all demographic variables were significantly associated with a better  
 299 attitude towards patients' safety score ( $p < 0.01$ ). Multiple linear regression analysis showed that female students  
 300 had a better attitude towards patients' safety score ( $p = 0.001$ ). In addition, it showed that higher-level students  
 301 and being involved in or having witnessed harm to patients while practicing were associated with a slightly lower  
 302 score ( $p = 0.000$ ), **Table 4**.

303 **Table 4** Multiple linear regression analysis predicting students' attitude towards patients' safety.

| Variable                                                         | Model <sup>a</sup> |       |          |                         |
|------------------------------------------------------------------|--------------------|-------|----------|-------------------------|
|                                                                  | B                  | SE    | $\beta$  | 95% Confidence interval |
| Demographic data                                                 |                    |       |          |                         |
| Males                                                            | Reference category |       |          |                         |
| <b>Females</b>                                                   | 0.96               | 0.292 | 0.06**   | (0.38 - 1.53)           |
| Year of study                                                    |                    |       |          |                         |
| First year                                                       | Reference category |       |          |                         |
| <b>Second year</b>                                               | -1.45              | 0.46  | -0.08**  | (-2.35 - -0.54)         |
| <b>Third year</b>                                                | -2.20              | 0.43  | -0.13*** | (-3.04 - -1.36)         |
| <b>Fourth year</b>                                               | -2.76              | 0.42  | -0.17*** | (-3.60 - -1.93)         |
| <b>Fifth year</b>                                                | -2.41              | 0.42  | -0.13*** | (-3.34 - -1.48)         |
| Having prior experience in healthcare                            |                    |       |          |                         |
| No                                                               | Reference category |       |          |                         |
| <b>Yes</b>                                                       | 0.21               | 0.33  | 0.01     | (-0.43 - 0.85)          |
| Being involved in or witnessed harm to patients while practicing |                    |       |          |                         |
| No                                                               | Reference category |       |          |                         |
| <b>Yes</b>                                                       | -1.17              | 0.33  | -0.07*** | (-1.81 - -0.53)         |
| Constant                                                         |                    |       |          |                         |
| Adjusted R <sup>2</sup>                                          |                    |       |          | 0.030                   |
| P-value                                                          |                    |       |          | 0.000                   |

304 \* $p < 0.05$ , \*\* $p < 0.01$ , \*\*\* $p < 0.001$

305 a: includes gender, year of study, having prior experience in healthcare, and being involved in or witnessed harm to patients while  
 306 practicing.

307 B: the average change in the dependent variable associated with a 1 unit change in the independent variable, statistically controlling  
 308 for the other independent variables; SE: it is the standard deviation of its sampling distribution or an estimate of that standard deviation;

309  $\beta$ : a statistical measure that compares the strength of the effect of each individual independent variable to the dependent variable



## 310 **DISCUSSION**

311 The current study has identified the attitudes of undergraduate pharmacy students towards patients' safety. The  
312 sample was collected from different universities in different countries, across all years of study for the pharmacy  
313 program, and using a previously validated tool. The data was collected from a large sample compared to previous  
314 similar studies. For example, Carruthers et al. (2009) conducted a questionnaire-based study on 364 undergraduate  
315 medical students and 66 tutors from one medical school in the UK <sup>6</sup>, while Tegegn et al. conducted their study  
316 with a population of 83 students from a single university in Ethiopia <sup>52</sup>. Also, there were previous surveys  
317 conducted by Tegegn et al. <sup>52</sup> and Carruthers et al. <sup>6</sup> which did not obtain data on the nationality of the participants.  
318 This limited our ability to make direct comparisons between different nationalities settings. The results highlighted  
319 that, generally, a positive attitude towards patient safety was an important issue among pharmacy undergraduate  
320 students. There was a small but significant difference in attitudes between male and female pharmacy students.  
321 These results are comparable with those of another previous study <sup>52</sup>, where 86.7% of female respondents had an  
322 overall positive attitude to patient safety compared to 83% of their male counterparts. Neither the previous nor  
323 the current study was able to explain this difference, and a further study of attitudes of male and female students  
324 towards patient safety is required to elucidate whether this is a real gender-influenced trait. Female students could  
325 be more emotional and sensitive to patients' health outcomes, therefore, this would make them more proactive  
326 and have stronger drive to act towards safer practices.

327 Comparison in terms of patient safety elements revealed variations among countries. The first subscale focused  
328 on "students being quality improvement focused" with results highlighting the superiority of Qatar, Indonesia,  
329 and India over the other countries. Such difference could be attributed to students in these countries receiving  
330 education more pertinent to patient safety and the science behind it that could cover medication errors, drug  
331 adverse events and their effect in optimizing patient outcomes. Although there are no recent research indicating  
332 that in these countries patient safety is fundamental in curricula, results reflect presence of such teaching modules,  
333 where studies reported that integrating patient safety in curricula will improve student knowledge <sup>53</sup>. Similar  
334 results were obtained in the second and third subscales which focused on addressing "the acceptability of  
335 questioning more senior healthcare professionals' behaviour" and "attitude towards open disclosure" which  
336 apparently put an emphasis on something that is a consequence of what has been taught. In these subscales the  
337 scores were lower than the first subscale and this could be expected, where students attitude will enable them to  
338 develop a culture of understanding and preventing errors from occurring <sup>45</sup>, which apparently requires practice

1  
2  
3 339 and elements that are beyond knowledge and hence the lower score of these two subscales were obtained when  
4  
5 340 compared to the first one.

6  
7 341 As for the fourth subscale “value of contextual learning”, Indonesia and India scored the highest. Here the domain  
8  
9 342 is assessing the students belief in the need to the delivery of patient safety interventions and teaching materials  
10  
11 343 <sup>45</sup>. Apparently, students who have good level of knowledge about patient safety will value the need to integrate  
12  
13 344 that into curricula and healthcare setting and hence the results reflected that. The last subscale assessed” students’  
14  
15 345 attitude pertinent to internalising errors regardless of harm”, this subscale is related to the attitude of students in  
16  
17 346 internalising the error rather than taking action and this section provides good indication whether students would  
18  
19 347 manage risks and errors that could or not affect patients. Results showed that Jordan scored the highest among the  
20  
21 348 seven countries while Qatar scored the lowest. Although Jordan did not score the highest among the countries in  
22  
23 349 the first four subscales, it scored around the mean and none of the sections was below 67.0% indicating a positive  
24  
25 350 attitude towards patient safety. This last subscale is critical in fostering a patient safety culture. As this attitude is  
26  
27 351 related to the presence of transparency and willingness to reporting errors. Despite variations and slightly lower  
28  
29 352 scores, Jordan scores were above average and their score in the final subsection rated the highest among the seven  
30  
31 353 countries. Future research is required to assess the pharmacy curricula in developing countries. Interestingly,  
32  
33 354 students’ attitude towards patient safety in Kuwait and Saudi Arabia, neighbouring countries with similar cultural  
34  
35 355 values, reported the lowest among the seven countries. The average of scores for the two countries showed results  
36  
37 356 that are shy above the 50% mark. It could be expected that in these two countries patient safety is still in its infancy  
38  
39 357 phase.

40  
41 358 In the current study, there were two factors which have been negatively correlated with attitudes towards patient  
42  
43 359 safety; these are the ‘year of study’ and “being involved in or having witnessed harm to patients while practicing”.  
44  
45 360 Similar findings were reported in a previous study and showed that students in their early years of study had  
46  
47 361 higher scores (a better attitude towards patient safety) compared to others in their final years of training <sup>54</sup>. This  
48  
49 362 could have arisen among the students due to a lack of formal and well-structured teaching on patient safety that  
50  
51 363 build up with years of study and have led to the reluctance to adopt patient safety practices. In addition, other  
52  
53 364 literature reported that professional socialisation plays a big role in shifting students’ and interns’ attitudes <sup>55</sup>,  
54  
55 365 which could be another important influencing factor. These results are inconsistent with another study’s results  
56  
57 366 among pharmacy students in Ethiopia <sup>52</sup>. Such a difference between the studies could be due to variations in the  
58  
59 367 study settings, the recruited participants or, possibly, due to the greater emphasis allocated to teaching patient  
60  
368 safety to students in specific countries over others. A follow-up study focusing on the change in attitudes towards

1  
2  
3 369 the pharmacy teaching course is required. In addition, there is a need for the reinforcement towards patient safety  
4  
5 370 throughout the pharmacy program. This has also been recommended previously in studies about attitudes towards  
6  
7 371 patient safety among medical students <sup>6,56</sup>. In a previous study, medical students who had received education on  
8  
9 372 patient safety attached greater importance to this topic and had more confidence in reporting incidences of poor  
10  
11 373 patient safety <sup>6</sup>. Also, it has been highlighted previously that there is a lack of patient safety education among a  
12  
13 374 range of clinical disciplines, including medical, nursing and pharmacy students <sup>57,58</sup>. Patient safety education has  
14  
15 375 the potential to revolutionise the attitudes of pharmacists and pharmacists-in-training, which has broad  
16  
17 376 implications for practice <sup>57</sup>.

18 377 In addition to the importance of educating patient safety at the university level, there is a need for constant  
19  
20 378 reinforcement of messages regarding patient safety. In one study, it has been reported that some of the positive  
21  
22 379 messages regarding improving patient care, which were taught to second-year medical students, had been  
23  
24 380 forgotten after one year <sup>37</sup>. Those students were also less likely to be open about the errors they had witnessed and  
25  
26 381 less likely to believe that it was necessary to disclose errors that had not caused patient harm. Similarly, in the  
27  
28 382 present study, it has been found that 49% of students agreed that errors should be internalised, regardless of harm  
29  
30 383 to patients. Pharmacy students in Ethiopia shared the same belief in reporting self-errors, where only half of the  
31  
32 384 students agreed, or strongly agreed, that pharmacists should report errors concerning a patient in situations where  
33  
34 385 harm had occurred <sup>52</sup>. A previous study in Pakistan that assessed the attitudes and perceptions of postgraduate  
35  
36 386 students towards patient safety reported consistent findings: that students felt less confident in reporting any error  
37  
38 387 other people had made in the work environment, no matter how serious the outcome had been for the patient <sup>54</sup>.

39 388 Many studies from different countries have reported that health care students have a common belief that medical  
40  
41 389 errors are inevitable, and that even very experienced people make medical errors <sup>54,56,59,60</sup>. Reporting medical  
42  
43 390 errors is important, and a failure to report such types of error indicates a lack of awareness of the risky  
44  
45 391 consequences of such practice to the healthcare services provided to the patients. This finding has an implication  
46  
47 392 for further research to understand the reasons for this behaviour; whether it is from a fear of reprisal from  
48  
49 393 colleagues or patients or a lack of recognition of reporting as part of the duty of care to patients. However,  
50  
51 394 incompatible results have been reported in North America, where the majority of students had positive attitudes  
52  
53 395 towards reporting serious errors when they encountered them, but they had inadequate knowledge about the  
54  
55 396 process of reporting them <sup>61</sup>. Also, in that study, it can be seen that some students had conflicting attitudes towards  
56  
57 397 reporting errors. They believed that reporting them would compromise inter-professional relationships, reduce the  
58  
59 398 patients' confidence in the healthcare system and interrupt the workflow.

60

### 399 **Strengths and weaknesses**

400 The current study has many strengths. First, to the best of our knowledge, this study is the first large-scale study  
401 comprising participants from multiple nations (six countries), which suggests the evidence is robust and more  
402 generalizable. The data was collected from a large sample compared to previous similar studies from different  
403 countries. Second, the research used a validated questionnaire and a non-biased recruitment process, which  
404 provided reassurance of the quality of the study and the findings reported<sup>45</sup>. However, there are some limitations.  
405 The study design itself, a cross-sectional survey design, limited our ability to identify causality between study  
406 variables. A further limitation of the current study was the small number of participants from some of the  
407 participating countries (Qatar; n= 61, and Kuwait; n= 134), and the dominance of the sample size by students  
408 from only two countries Jordan (39.9%) and Saudi Arabia (19.7%). However, due to the small population size in  
409 Qatar and Kuwait, and knowing that we recruited students from the only two available faculties of pharmacy in  
410 these two countries, we assume that these small numbers are sufficient to draw conclusions from. Future research  
411 should consider a wider range of countries during the recruitment phase to identify whether the findings can be  
412 expanded. Finally, we were not able to estimate the response rate for our study, which might lead to nonresponse  
413 bias, as we could not demonstrate how well the sample drawn from the population of interest. Therefore, the  
414 findings should be interpreted carefully.

### 415 **Implications of Findings to Practice**

416 The findings of this study can help curricula developers to focus on patient safety teaching and make it an essential  
417 part of pharmacy curricula. Continuous educational sessions on patient safety and the reporting of errors in patient  
418 care will help in raising the students' knowledge and awareness of patient safety and medical errors. In addition,  
419 to ensure the quality of care and patient safety, it is important to provide clinical and senior supervision when  
420 students are given tasks related to patient safety at all levels of the pharmacy program. Future studies to investigate  
421 the factors and attitudes of pharmacists and pharmacy students are warranted. Cultural and regional factors are  
422 important and must be taken into account when conducting future research. However, it is also important to  
423 mention that future research should also be conducted at the patient-level to study and explore patient safety from  
424 different perspectives.

425 In conclusion, the current study has revealed the positive attitudes of pharmacy students towards patient safety.  
426 There is currently limited number of research regarding the effect of pharmacy students' attitudes and the wider  
427 implications for practice specifically, the Middle East and other developing countries. Patient safety should be  
428 covered explicitly during the pharmacy students' education and reinforced at each year of study within the

1  
2  
3 429 curriculum to ensure that the next generation of pharmacists is equipped with the knowledge and behaviours to  
4  
5 430 ensure good patient safety. An additional focus should be placed on the area of patient safety to investigate further  
6  
7 431 the key findings of the current study.  
8

9 432

10  
11 433 **Author affiliations**

12  
13  
14 434 <sup>1</sup> Faculty of Pharmacy, Isra University, Amman, Jordan (Naser)

15  
16 435 <sup>2</sup> Department of Pharmacy Practice, Faculty of Pharmacy, Kuwait University, Kuwait, Kuwait (Alsairafi and  
17  
18 436 Jeragh-Alhaddad)

19  
20  
21 437 <sup>3</sup> Department of Clinical Pharmacy and Practice, College of Pharmacy, QU Health, Qatar University, Doha, Qatar  
22  
23 438 (Awaisu)

24  
25 439 <sup>4</sup> Faculty of Medicine, Umm Alqura University, Mecca, Saudi Arabia (Alwafi)

26  
27  
28 440 <sup>5</sup> Department of Biopharmaceutics and Clinical Pharmacy, Faculty of Pharmacy, The University of Jordan  
29  
30 441 (Awwad)

31  
32  
33 442 <sup>6</sup> Department of Pharmaceutical Medicine, School of Pharmaceutical Education and Research, Jamia Hamdard,  
34  
35 443 New Delhi, India (Hussain, Singh)

36  
37 444 <sup>7</sup> Department of Pharmaceutics, College of Pharmacy, Najran University, Najran, Saudi Arabia (Alyami)

38  
39 445 <sup>8</sup> Research Department of Practice and Policy, UCL School of Pharmacy, London, United Kingdom (Alsharif)

40  
41  
42 446 <sup>9</sup> Department of Pharmacy Practice, College of Pharmacy, Princess Nourah bint Abdulrahman University, Riyadh,  
43  
44 447 Saudi Arabia (Alsharif)

45  
46 448 <sup>10</sup> Faculty of Pharmacy, Universitas Padjadjaran, Indonesia (Kautsar)

47  
48  
49 449 <sup>11</sup> Pharmacy Practice Department, Clinical Pharmacy College, King Faisal University, Alhasa, Saudi Arabia  
50  
51 450 (AbuAlhommos).

52  
53  
54 451 **Acknowledgments**

55  
56 452 This study was supported by Isra University (Amman, Jordan). We would like to thanks Saudi Ministry of  
57  
58 453 Education for their support. Alaa Alsharif was funded by the Deanship of Scientific Research at Princess Nourah  
59  
60 454 bint Abdulrahman University through the Fast-track Research Funding Program. In addition, the authors

1  
2  
3 455 acknowledge Mohammad Alkharouf, Leena Abdullah, and Asma Almashayekh for helping in collection of data  
4  
5 456 in Jordan.

#### 6 7 457 **Contributors**

8  
9 458 The authors who contributed to the work described in this paper are as follows: Naser contributed to the study  
10  
11 459 design. Naser, Alsairafi, Awaisu, Alwafi, Hussain, Singh, Awwad, Alsharif, AbuAlhommos, Alyami, Alhaddad,  
12  
13 460 and Kautsar conducted the study and collected data. Naser conducted to the data analysis. Naser, Alsairafi, Alwafi,  
14  
15 461 Awwad, Awaisu, and Dahmash were involved in interpretation of data. Naser, Alsairafi, Alwafi, Awwad, Awaisu,  
16  
17 462 and Dahmash wrote the first draft of the article. All authors reviewed the manuscript for important intellectual  
18  
19 463 content and provided final approval of the version to be published. All authors agreed to be accountable for all  
20  
21 464 aspects of the work in ensuring that questions related to the accuracy or integrity of any part of the work are  
22  
23 465 appropriately investigated and resolved.

#### 24 466 **Funding**

25  
26 467 No fund was received for this study

#### 27 28 468 **Competing interests**

29  
30 469 None declared.

#### 31 32 470 **Patient consent**

33  
34 471 Not required.

#### 35 36 472 **Ethics approval**

37  
38 473 Ethical approval for this study was obtained from the research ethics committees (REC) of the participating  
39  
40 474 universities in Jordan (REC at faculty of pharmacy at Isra University (PH – 2019 – 07), Saudi Arabia (Prince  
41  
42 475 Norah bint Abdul Rahman University Institutional Review Board (19 – 0038), Kuwait (Health Sciences Centre  
43  
44 476 Ethical Committee at Kuwait University (VDR/EC), Indonesia (REC of Universitas Padjadjaran  
45  
46 477 (04/UN6.KEP/EC/2020), and India (ASPMCH/436/07/2019). Permission and approval for the use of the study  
47  
48 478 questionnaire were acquired from the corresponding author of the original study.

#### 49 50 479 **Provenance and peer review**

51  
52 480 Not commissioned; externally peer reviewed.

#### 53 54 481 **Data sharing statement**

55  
56 482 No additional data are available.

57  
58  
59  
60 483

484 **References**

485

- 486 1. World Health Organization. Patient safety. *Education and training* 2020;  
 487 <https://www.who.int/patientsafety/education/en/>, 2020.
- 488 2. Frush K. Fundamentals of a patient safety program. . *Pediatr Radiol.* 2008;38(4):S685 – 689.
- 489 3. Elmontsri M, Almashrafi A, Banarsee R, Majeed A. Status of patient safety culture in Arab countries: a  
 490 systematic review. *BMJ Open.* 2017;7(2):e013487.
- 491 4. Elmontsri M, Banarsee R, Majeed A. Improving patient safety in developing countries - moving towards  
 492 an integrated approach. *JRSM Open.* 2018;9(11):2054270418786112.
- 493 5. Tregunno D, Ginsburg L, Clarke B, Norton P. Integrating patient safety into health professionals'  
 494 curricula: a qualitative study of medical, nursing and pharmacy faculty perspectives. *BMJ Qual Saf.*  
 495 2014;23(3):257-264.
- 496 6. Carruthers S, Lawton R, Sandars J, Howe A, Perry M. Attitudes to patient safety amongst medical  
 497 students and tutors: Developing a reliable and valid measure. *Med Teach.* 2009;31(8):370 - 376.
- 498 7. Hindle D, Braithwaite J, Iedema R. The Centre for Clinical Governance Research, Patient Safety  
 499 Research: A review of the technical literature. . In. Sydney: University of New South Wales; 2005.
- 500 8. Teigland C, Blasiak R, Wilson L, Hines R, Meyerhoff K, Viera A. Patient safety and quality  
 501 improvement education: a cross sectional study of medical students' preferences and attitudes. *BMC Med*  
 502 *Educ.* 2013;13(16):1 - 6.
- 503 9. Unmet Needs: Teaching Physicians to Provide Safe Patient Care. [press release]. Boston, MA: National  
 504 Patient Safety Foundation 2010.
- 505 10. Department of Health. *Modernising Medical Careers. The New Curriculum for the Foundation Years in*  
 506 *Postgraduate Education and Training.* London, UK: Department of Health; 2007.
- 507 11. American Association of Colleges of Nursing. Hallmarks of quality and patient safety: recommended  
 508 baccalaureate competencies and curricular guidelines to ensure high-quality and safe patient care. *J Prof*  
 509 *Nurs.* 2006;22:329 - 330.
- 510 12. Cronenwett L, Sherwood G, Barnsteiner J, et al. Quality and safety education for nurses. *Nurs Outlook.*  
 511 2007;55(3):122 - 131.
- 512 13. Frank J, Brien S. *The Safety Competencies: Enhancing Patient Safety Across the Health Professions.*  
 513 Ottawa, ON: Canadian Patient Safety Institute; 2008.
- 514 14. Schumacher D, Slovin S, Riebschleger M, Englander R, Hicks P, Carraccio C. Perspective: beyond  
 515 counting hours: the importance of supervision, professionalism, transitions of care, and workload in  
 516 residency training. *Acad Med.* 2012;87(7):883 - 888.
- 517 15. World Health Organization. The WHO patient safety curriculum guide for medical schools. 2009;  
 518 <https://apps.who.int/iris/handle/10665/44091>, 2020.
- 519 16. World Health Organization. Multi-professional Patient Safety Curriculum Guide. [press release]. WHO  
 520 Press 2011.
- 521 17. Marriott J, Nation R, Roller L, et al. Pharmacy education in the context of Australian practice. *Am J*  
 522 *Pharm Educ.* 2008;72(6):1-18.

- 1  
2  
3 523 18. Kiersma M, Darbishire P, Plake K, Oswald C, Walters B. Laboratory Session to Improve First-year  
4 524 Pharmacy Students' Knowledge and Confidence Concerning the Prevention of Medication Errors *Am J*  
5 525 *Pharm Educ.* 2009;73(6):1 - 8.  
6  
7 526 19. Sukkari S, Sasich L, Tuttle D, Abu-Baker A, Howell H. Development and evaluation of a required patient  
8 527 safety course. *Am J Pharm Educ.* 2008;72(3):1 - 10.  
9  
10 528 20. Lin K, Travlos D, Wadelin J, Vlases P. Simulation and introductory pharmacy practice experiences. *Am*  
11 529 *J Pharm Educ.* 2011;75(10):1 - 13.  
12  
13 530 21. Wilson RM, Michel P, Olsen S, et al. Patient safety in developing countries: retrospective estimation of  
14 531 scale and nature of harm to patients in hospital. *BMJ.* 2012;344:e832.  
15  
16 532 22. Albsoul AY, Wazaify M, Alkofahi A. Pharmaceutical Care Education and Practice in Jordan in the New  
17 533 Millennium. *Jordan Journal of Pharmaceutical Sciences.* 2008;1(1):83 - 90.  
18  
19 534 23. El Hajj MS, Hammad AS, Afifi HM. Pharmacy students' attitudes toward pharmaceutical care in Qatar.  
20 535 *Ther Clin Risk Manag.* 2014;10:121-129.  
21  
22 536 24. Al-Wazaify M, Matowe L, Albsoul-Younes A, Al-Omran OA. Pharmacy Education in Jordan, Saudi  
23 537 Arabia, and Kuwait. *American Journal of Pharmaceutical Education* 2006;70(1):1 - 4.  
24  
25 538 25. Basak SC, Sathyanarayana D. Pharmacy Education in India. *American Journal of Pharmaceutical*  
26 539 *Education* 2010;74(4):1 - 8.  
27  
28 540 26. Mehmood S, Hasan SMF, Razzakova CM, et al. Abstracts from the 1st JoPPP Conference on  
29 541 Pharmaceutical Policy and Practice. *Journal of Pharmaceutical Policy and Practice.* 2020;13(S1).  
30  
31 542 27. Leotsakos A, Ardolino A, Cheung R, Zheng H, Barraclough B, Walton M. Educating future leaders in  
32 543 patient safety. *J Multidiscip Healthc.* 2014;7:381-388.  
33  
34 544 28. Bloom S. The medical school as a social organization: the sources of resistance to change. *Med Educ.*  
35 545 1989;23:228 - 241.  
36  
37 546 29. Nie Y, Li L, Duan Y, et al. Patient safety education for undergraduate medical students: a systematic  
38 547 review. *BMC Med Educ.* 2011;11:33.  
39  
40 548 30. Wong B, Etchells E, Kuper A, Levinson W, Shojanian K. Teaching quality improvement and patient  
41 549 safety to trainees: a systematic review. *Acad Med.* 2010;85(9):1425 - 1439.  
42  
43 550 31. Kane J. Patient safety education: overreported and still lacking. *Acad Med.* 2010;85:1397 - 1398.  
44  
45 551 32. Alper E, Rosenberg E, O'Brien K, Fischer M, Durning S. Patient safety education at U.S. and Canadian  
46 552 medical Schools: results from the 2006 Clerkship Directors in Internal Medicine Survey. *Acad Med.*  
47 553 2009;84(1672 - 1676).  
48  
49 554 33. Castel E, Ginsburg L. *Patient Safety in Health Professional Education: Development of a Questionnaire*  
50 555 *to Assess Student Learning*: The Canadian Patient Safety Institute.;2008.  
51  
52 556 34. Candace S. Students' Attitudes: The "Other" Important Outcome in Statistics Education Paper presented  
53 557 at: Joint Statistics Meetings2003; San Francisco.  
54  
55 558 35. Ginsburg LR, Tregunno D, Norton PG. Self-reported patient safety competence among new graduates  
56 559 in medicine, nursing and pharmacy. *BMJ Qual Saf.* 2013;22(2):147-154.  
57  
58 560 36. Bentler P, Speckart G. Attitudes "cause" behaviors: a structural equation analysis. *J Pers Soc Psychol.*  
59 561 1981;40:226 - 238.  
60



- 1  
2  
3 562 37. Madigosky W, Headrick L, Nelson K, Cox K, Anderson T. Changing and sustaining medical students' knowledge, skills, and attitudes about patient safety and medical fallibility. *Acad Med.* 2006;81(1):94 -  
4 563  
5 564 101.  
6  
7 565 38. Leung G, Patil N. Patient safety in the undergraduate curriculum: medical students' perception. *Hong*  
8 566  
9 567 39. Halbach J, Sullivan L. Teaching medical students about medical errors and patient safety: evaluation of  
10 568  
11 569 40. Schnall R, Stone P, Currie L, Desjardins K, John R, Bakken S. Development of a self-report instrument  
12 570  
13 571 41. Flin R, Patey R, Jackson J, Mearns K, Dissanayaka U. Year 1 medical undergraduates' knowledge of  
14 572  
15 573 42. Dudas R, Bundy D, Miller M, M. B. Can teaching medical students to investigate medication errors  
16 574  
17 575 43. Moskowitz E, Veloski J, Fields S, Nash D. Development and evaluation of a 1-day interclerkship  
18 576  
19 577 44. Kiersma M, Plake K, Darbishire P. Patient safety instruction in US health professions education. *Am J*  
20 578  
21 579 45. Walpola RL, Fois RA, Carter SR, McLachlan AJ, Chen TF. Validation of a survey tool to assess the  
22 580  
23 581 46. World Health Organization. Foodborne Disease Outbreaks. Guidelines for Investigation and Control.  
24 582  
25 583 47. Farmer K. Methods for measuring and monitoring medication regimen adherence in clinical trials and  
26 584  
27 585 48. MacCallum R, Widaman K, Zhang K, Sehee S. Sample size in factor analysis. *Psychol Methods.*  
28 586  
29 587 49. Dornyei Z. *Research methods in applied linguistics.* . New York 2007.  
30 588 50. Mathers N, Fox N, Hunn A. *Surveys and Questionnaires.* . The NIHR RDS for the East Midlands; 2007.  
31 589 51. Smith F. *Research Methods in Pharmacy Practice.* London 2002.  
32 590 52. Tegegn H, Abebe T, Ayalew M, Bhagavathula A. Patient safety attitudes of pharmacy students in an  
33 591  
34 592 53. Gilligan AM, Myers, J., Nash, J. D., Lavigne, J. E., Moczygemba, L. R., Plake, K. S., Quiñones-Boex,  
35 593  
36 594 A. C., Holdford, D., West-Strum, D., & Warholak, T. L. . Educating Pharmacy Students to Improve  
37 595  
38 596 54. Bari A, Jabeen U, Bano I, Rathore AW. Patient safety awareness among postgraduate students and nurses  
39 597  
40 598 55. Walpola RL, Fois RA, McLachlan AJ, Chen TF. Evaluating the Effectiveness of an Educational  
41 599  
42 600  
43  
44  
45  
46  
47  
48  
49  
50  
51  
52  
53  
54  
55  
56  
57  
58  
59  
60

- 1  
2  
3 601 56. Nabilou B, Feizi A, Seyedin H. Patient Safety in Medical Education: Students' Perceptions, Knowledge  
4 602 and Attitudes. *PLoS One*. 2015;10(8):e0135610.  
5  
6 603 57. Fuji K, Paschal K, Galt K, Abbott A. Pharmacy student attitudes toward an interprofessional patient  
7 604 safety course: an exploratory mixed methods study. *Curr Pharm Teach Learn* 2010;2(4):238 - 247.  
8  
9 605 58. Sherwood G, Drenkard K. Quality and safety curricula in nursing education: Matching practice realities.  
10 606 *Nurs Outlook*. 2007;55(3):151 - 155.  
11  
12 607 59. Shah N, Jawaid M, Shah N, Ali S. Patient safety: Perceptions of Medical Students of Dow Medical  
13 608 College ,Karachi *J Pak Med Assoc*. 2015;65(12):1261- 1265.  
14  
15 609 60. Al-Khaldi YM. Attitude of primary care physicians toward patient safety in Aseer region, Saudi Arabia.  
16 610 *J Family Community Med*. 2013;20(3):153-158.  
17  
18 611 61. Gavaza P, Bui B. Pharmacy students' attitudes toward reporting serious adverse drug events. *Am J Pharm*  
19 612 *Educ*. 2012;76(10):1- 8.  
20  
21  
22  
23  
24 615  
25  
26 616  
27  
28 617  
29  
30 618  
31  
32 619  
33  
34 620  
35  
36 621  
37  
38 622  
39  
40 623  
41  
42 624  
43  
44 625  
45  
46 626  
47  
48 627  
49  
50 628  
51  
52 629  
53  
54 630  
55  
56 631  
57  
58 632  
59  
60 633  
60 634

1  
2  
3 635 **Tables legends:**  
4

5 636 **Table 1** Pharmacy students' characteristics from each country.  
6

7 637 **Table 2** Pharmacy students mean attitude towards patient safety scores in individual subscales and total scale  
8  
9 638 scores stratified by country (n = 2,595).  
10

11 639 **Table 3** Pharmacy students' attitude towards patient safety score by students' characteristics (n = 2,595).  
12

13 640 **Table 4** Multiple linear regression analysis predicting students' attitude towards patients' safety.  
14  
15  
16  
17  
18  
19  
20  
21  
22  
23  
24  
25  
26  
27  
28  
29  
30  
31  
32  
33  
34  
35  
36  
37  
38  
39  
40  
41  
42  
43  
44  
45  
46  
47  
48  
49  
50  
51  
52  
53  
54  
55  
56  
57  
58  
59  
60

1  
2  
3  
4  
5  
6  
7  
8  
9  
10  
11  
12  
13  
14  
15  
16  
17  
18  
19  
20  
21  
22  
23  
24  
25  
26  
27  
28  
29  
30  
31  
32  
33  
34  
35  
36  
37  
38  
39  
40  
41  
42  
43  
44  
45  
46

For peer review only

**Cronbach alpha values:**

| <b>Scale</b>                                                                            | <b>Cronbach's Alpha</b> | <b>Cronbach's Alpha Based on Standardized Items</b> | <b>Number of Items</b> |
|-----------------------------------------------------------------------------------------|-------------------------|-----------------------------------------------------|------------------------|
| “Being quality improvement focused” subscale                                            | 0.783                   | 0.783                                               | 4                      |
| “Value of contextual learning” subscale                                                 | 0.586                   | 0.585                                               | 3                      |
| “Internalising errors regardless of harm” subscale                                      | 0.746                   | 0.755                                               | 3                      |
| “Acceptability of questioning more senior healthcare professionals’ behaviour” subscale | 0.633                   | 0.634                                               | 2                      |
| “Attitude towards open disclosure” subscale                                             | 0.561                   | 0.562                                               | 2                      |
| <b>Total scale</b>                                                                      | <b>0.724</b>            | 0.755                                               | 14                     |

**STROBE 2007 (v4) Statement—Checklist of items that should be included in reports of *cross-sectional studies***

| Section/Topic                | Item # | Recommendation                                                                                                                                                                       | Reported on page # |
|------------------------------|--------|--------------------------------------------------------------------------------------------------------------------------------------------------------------------------------------|--------------------|
| <b>Title and abstract</b>    | 1      | (a) Indicate the study's design with a commonly used term in the title or the abstract                                                                                               | 1 and 2            |
|                              |        | (b) Provide in the abstract an informative and balanced summary of what was done and what was found                                                                                  | 2                  |
| <b>Introduction</b>          |        |                                                                                                                                                                                      |                    |
| Background/rationale         | 2      | Explain the scientific background and rationale for the investigation being reported                                                                                                 | 4 and 5            |
| Objectives                   | 3      | State specific objectives, including any prespecified hypotheses                                                                                                                     | 5                  |
| <b>Methods</b>               |        |                                                                                                                                                                                      |                    |
| Study design                 | 4      | Present key elements of study design early in the paper                                                                                                                              | 5                  |
| Setting                      | 5      | Describe the setting, locations, and relevant dates, including periods of recruitment, exposure, follow-up, and data collection                                                      | 5 and 6            |
| Participants                 | 6      | (a) Give the eligibility criteria, and the sources and methods of selection of participants                                                                                          | 5 and 6            |
| Variables                    | 7      | Clearly define all outcomes, exposures, predictors, potential confounders, and effect modifiers. Give diagnostic criteria, if applicable                                             | Not applicable     |
| Data sources/<br>measurement | 8*     | For each variable of interest, give sources of data and details of methods of assessment (measurement). Describe comparability of assessment methods if there is more than one group | 5, 6 and 7         |
| Bias                         | 9      | Describe any efforts to address potential sources of bias                                                                                                                            | Not applicable     |
| Study size                   | 10     | Explain how the study size was arrived at                                                                                                                                            | 5 and 6            |
| Quantitative variables       | 11     | Explain how quantitative variables were handled in the analyses. If applicable, describe which groupings were chosen and why                                                         | 7                  |
| Statistical methods          | 12     | (a) Describe all statistical methods, including those used to control for confounding                                                                                                | 7                  |
|                              |        | (b) Describe any methods used to examine subgroups and interactions                                                                                                                  | 7                  |
|                              |        | (c) Explain how missing data were addressed                                                                                                                                          | Not applicable     |
|                              |        | (d) If applicable, describe analytical methods taking account of sampling strategy                                                                                                   | Not applicable     |
|                              |        | (e) Describe any sensitivity analyses                                                                                                                                                | Not applicable     |
| <b>Results</b>               |        |                                                                                                                                                                                      |                    |

|                          |     |                                                                                                                                                                                                              |                |
|--------------------------|-----|--------------------------------------------------------------------------------------------------------------------------------------------------------------------------------------------------------------|----------------|
| Participants             | 13* | (a) Report numbers of individuals at each stage of study—eg numbers potentially eligible, examined for eligibility, confirmed eligible, included in the study, completing follow-up, and analysed            | 8              |
|                          |     | (b) Give reasons for non-participation at each stage                                                                                                                                                         | Not applicable |
|                          |     | (c) Consider use of a flow diagram                                                                                                                                                                           | Not applicable |
| Descriptive data         | 14* | (a) Give characteristics of study participants (eg demographic, clinical, social) and information on exposures and potential confounders                                                                     | 8 and 9        |
|                          |     | (b) Indicate number of participants with missing data for each variable of interest                                                                                                                          | Not applicable |
| Outcome data             | 15* | Report numbers of outcome events or summary measures                                                                                                                                                         | 8 -12          |
| Main results             | 16  | (a) Give unadjusted estimates and, if applicable, confounder-adjusted estimates and their precision (eg, 95% confidence interval). Make clear which confounders were adjusted for and why they were included | Not applicable |
|                          |     | (b) Report category boundaries when continuous variables were categorized                                                                                                                                    | Not applicable |
|                          |     | (c) If relevant, consider translating estimates of relative risk into absolute risk for a meaningful time period                                                                                             | Not applicable |
| Other analyses           | 17  | Report other analyses done—eg analyses of subgroups and interactions, and sensitivity analyses                                                                                                               | Not applicable |
| <b>Discussion</b>        |     |                                                                                                                                                                                                              |                |
| Key results              | 18  | Summarise key results with reference to study objectives                                                                                                                                                     | 12             |
| Limitations              | 19  | Discuss limitations of the study, taking into account sources of potential bias or imprecision. Discuss both direction and magnitude of any potential bias                                                   | 14             |
| Interpretation           | 20  | Give a cautious overall interpretation of results considering objectives, limitations, multiplicity of analyses, results from similar studies, and other relevant evidence                                   | 12-14          |
| Generalisability         | 21  | Discuss the generalisability (external validity) of the study results                                                                                                                                        | 14             |
| <b>Other information</b> |     |                                                                                                                                                                                                              |                |
| Funding                  | 22  | Give the source of funding and the role of the funders for the present study and, if applicable, for the original study on which the present article is based                                                | 17             |

\*Give information separately for cases and controls in case-control studies and, if applicable, for exposed and unexposed groups in cohort and cross-sectional studies.

**Note:** An Explanation and Elaboration article discusses each checklist item and gives methodological background and published examples of transparent reporting. The STROBE checklist is best used in conjunction with this article (freely available on the Web sites of PLoS Medicine at <http://www.plosmedicine.org/>, Annals of Internal Medicine at <http://www.annals.org/>, and Epidemiology at <http://www.epidem.com/>). Information on the STROBE Initiative is available at [www.strobe-statement.org](http://www.strobe-statement.org).
