# Supplementary material for: Attitudes of pharmacy students towards patient safety: a cross-sectional study from six developing countries
Source: PubMed Central journal article supplement — BMJ Open. 2020 Dec 15;10(12):e039459. doi: 10.1136/bmjopen-2020-039459 (PMC7745325; doi:10.1136/bmjopen-2020-039459), 2020-12-15
Supplement: bmjopen-2020-039459supp001.pdf [file bmjopen-2020-039459supp001.pdf]

**Cronbach alpha values:**

| <b>Scale</b>                                                                            | <b>Cronbach's Alpha</b> | <b>Cronbach's Alpha Based on Standardized Items</b> | <b>Number of Items</b> |
|-----------------------------------------------------------------------------------------|-------------------------|-----------------------------------------------------|------------------------|
| “Being quality improvement focused” subscale                                            | 0.783                   | 0.783                                               | 4                      |
| “Value of contextual learning” subscale                                                 | 0.586                   | 0.585                                               | 3                      |
| “Internalising errors regardless of harm” subscale                                      | 0.746                   | 0.755                                               | 3                      |
| “Acceptability of questioning more senior healthcare professionals’ behaviour” subscale | 0.633                   | 0.634                                               | 2                      |
| “Attitude towards open disclosure” subscale                                             | 0.561                   | 0.562                                               | 2                      |
| <b>Total scale</b>                                                                      | <b>0.724</b>            | 0.755                                               | 14                     |
